# Supplementary material for: Developing degraders: principles and perspectives on design and chemical space
Source: Royal Society of Chemistry journal article supplement (doi:10.1039/c9md00272c), 2019-01-01
Supplement: c9md00272c1.xlsx [file c9md00272c1.xlsx]

## Sheet: Sheet1
Structure	SMILES	Name	Reference	Institute	E3 Ligase	E3 Ligase Ligand	Target	MW	cLogP	HBD	HBA	NRotB	TPSA	Amide bond count	NAr	cLogD	AB-MPS	Linker Length	Linker Type	Lipinski Rule Violations	Deg_S
O=C(CC1)NC(C1N2C(C(C(OCCNC(C[C@@H](C3=NN=C(N3C4=C5C(C)=C(S4)C)C)N=C5C(C=C6)=CC=C6Cl)=O)=CC=C7)=C7C2=O)=O)=O	O=C(CC1)NC(C1N2C(C(C(OCCNC(C[C@@H](C3=NN=C(N3C4=C5C(C)=C(S4)C)C)N=C5C(C=C6)=CC=C6Cl)=O)=CC=C7)=C7C2=O)=O)=O	ZXH-2-42	https://www.ncbi.nlm.nih.gov/pubmed/29892083	Dana-Farber Cancer Institute	CRBN	Thalidomide	BRD4	700.167	3.32	2	10	9	162.2	1	4	1.47	14.53	4	Alkyl	2	7
O=C(CCC1N2C(C3=C(C=CC=C3NCCCCCNC(C4=C(C5=C(S4)N6C(C)=NN=C6[C@H](CC(OC)=O)N=C5C7=CC=C(C=C7)Cl)C)=O)C2=O)=O)NC1=O	O=C(CCC1N2C(C3=C(C=CC=C3NCCCCCNC(C4=C(C5=C(S4)N6C(C)=NN=C6[C@H](CC(OC)=O)N=C5C7=CC=C(C=C7)Cl)C)=O)C2=O)=O)NC1=O	ZXH-3-26	https://www.ncbi.nlm.nih.gov/pubmed/29892083	Dana-Farber Cancer Institute	CRBN	Pomalidomide	BRD4	785.273	4.07	3	11	14	191.3	1	4	1.97	19.03	6	Alkyl	4	7
CN(S(C)(=O)=O)C1=CC(CNC2=C(C(F)(F)F)C=NC(NC3=CC=C(OCCOCCOCCC(NCCOC4=C(C(N(C5C(NC(CC5)=O)=O)C6=O)=O)C6=CC=C4)=O)C=C3)=N2)=CC=C1	CN(S(C)(=O)=O)C1=CC(CNC2=C(C(F)(F)F)C=NC(NC3=CC=C(OCCOCCOCCC(NCCOC4=C(C(N(C5C(NC(CC5)=O)=O)C6=O)=O)C6=CC=C4)=O)C=C3)=N2)=CC=C1	FAK PROTAC-9	https://www.ncbi.nlm.nih.gov/pubmed/30444612	Yale University	CRBN	Thalidomide	FAK	926.922	3.23	4	18	24	235.73	1	4	2	29	14	PEG2 Alkyl Amide	4	7
CN(S(C)(=O)=O)C1=CC(CNC2=C(C(F)(F)F)C=NC(NC3=CC=C(OCCCOCCC(NCCOC4=C(C(N(C5C(NC(CC5)=O)=O)C6=O)=O)C6=CC=C4)=O)C=C3)=N2)=CC=C1	CN(S(C)(=O)=O)C1=CC(CNC2=C(C(F)(F)F)C=NC(NC3=CC=C(OCCCOCCC(NCCOC4=C(C(N(C5C(NC(CC5)=O)=O)C6=O)=O)C6=CC=C4)=O)C=C3)=N2)=CC=C1	FAK PROTAC-8	https://www.ncbi.nlm.nih.gov/pubmed/30444612	Yale University	CRBN	Thalidomide	FAK	896.896	3.35	4	17	22	226.5	1	4	2.11	26.89	12	PEG3 Alkyl Amide	4	7
O=C1N[C@H](COC2=C3C=C(OC)C(C(N)=O)=CC3=C(C#CCN4CCC5(CCN(C6=NC=C(C(N[C@H](C(N7C[C@H](O)C[C@H]7C(NCC8=CC=C(C9=C(C)N=CS9)C=C8)=O)=O)C(C)(C)C)=O)C=N6)CC5)CC4)C=C2)[C@H](CC)[C@@H]1F	O=C1N[C@H](COC2=C3C=C(OC)C(C(N)=O)=CC3=C(C#CCN4CCC5(CCN(C6=NC=C(C(N[C@H](C(N7C[C@H](O)C[C@H]7C(NCC8=CC=C(C9=C(C)N=CS9)C=C8)=O)=O)C(C)(C)C)=O)C=N6)CC5)CC4)C=C2)[C@H](CC)[C@@H]1F	GSK 314A	Unpublished	GSK	VHL	VH 032	IRAK4	1085.31	5.03	5	14	21	232.95	2	5	3	26	16	Spiro piperidine Pyrimidine	5	7
CN(CCCNC1=NC(NC2=CC=C(OCCOCCOCCOCCOCCOCC(=O)N[C@H](C(=O)N3C[C@H](O)C[C@H]3C(=O)NCC3=CC=C(C=C3)C3=C(C)N=CS3)C(C)(C)C)C=C2)=NC=C1Br)C(=O)C1CCC1	CN(CCCNC1=NC(NC2=CC=C(OCCOCCOCCOCCOCCOCC(=O)N[C@H](C(=O)N3C[C@H](O)C[C@H]3C(=O)NCC3=CC=C(C=C3)C3=C(C)N=CS3)C(C)(C)C)C=C2)=NC=C1Br)C(=O)C1CCC1	3k	https://www.ncbi.nlm.nih.gov/pubmed/28692295	Yale University	VHL	VH032	TBK1	1125.19	5.23	5	16	37	235.57	2	4	3.51	41.51	18	PEG2	4	7
CN(S(C)(=O)=O)C1=CC(CNC2=C(C(F)(F)F)C=NC(NC3=CC=C(OCCOCC(N[C@@H](C(C)(C)C)C(N4C[C@@H](O)C[C@H]4C(NCC(C=C5)=CC=C5C6=C(C)N=CS6)=O)=O)=O)C=C3)=N2)=CC=C1	CN(S(C)(=O)=O)C1=CC(CNC2=C(C(F)(F)F)C=NC(NC3=CC=C(OCCOCC(N[C@@H](C(C)(C)C)C(N4C[C@@H](O)C[C@H]4C(NCC(C=C5)=CC=C5C6=C(C)N=CS6)=O)=O)=O)C=C3)=N2)=CC=C1	FAK PROTAC-1	https://www.ncbi.nlm.nih.gov/pubmed/30444612	Yale University	VHL	VH032	FAK	982.108	5.04	5	16	24	215.72	2	5	3.6	29.6	6	PEG2	5	7
CN(S(C)(=O)=O)C1=CC(CNC2=C(C(F)(F)F)C=NC(NC3=CC=C(OCCCOCC(N[C@@H](C(C)(C)C)C(N4C[C@@H](O)C[C@H]4C(NCC(C=C5)=CC=C5C6=C(C)N=CS6)=O)=O)=O)C=C3)=N2)=CC=C1	CN(S(C)(=O)=O)C1=CC(CNC2=C(C(F)(F)F)C=NC(NC3=CC=C(OCCCOCC(N[C@@H](C(C)(C)C)C(N4C[C@@H](O)C[C@H]4C(NCC(C=C5)=CC=C5C6=C(C)N=CS6)=O)=O)=O)C=C3)=N2)=CC=C1	FAK PROTAC-2	https://www.ncbi.nlm.nih.gov/pubmed/30444612	Yale University	VHL	VH032	FAK	996.135	5.34	5	16	25	215.72	2	5	3.66	30.66	7	PEG3	5	7
CN(S(C)(=O)=O)C1=CC(CNC2=C(C(F)(F)F)C=NC(NC3=CC=C(OCCOCCOCCC(N[C@@H](C(C)(C)C)C(N4C[C@@H](O)C[C@H]4C(NCC(C=C5)=CC=C5C6=C(C)N=CS6)=O)=O)=O)C=C3)=N2)=CC=C1	CN(S(C)(=O)=O)C1=CC(CNC2=C(C(F)(F)F)C=NC(NC3=CC=C(OCCOCCOCCC(N[C@@H](C(C)(C)C)C(N4C[C@@H](O)C[C@H]4C(NCC(C=C5)=CC=C5C6=C(C)N=CS6)=O)=O)=O)C=C3)=N2)=CC=C1	FAK PROTAC-5	https://www.ncbi.nlm.nih.gov/pubmed/30444612	Yale University	VHL	VH032	FAK	1040.19	5.44	5	17	28	224.95	2	5	3.79	33.79	10	PEG2	5	7
O=C(N1)CCC(N2C(C3=C(C2=O)C=CC=C3OCCCCCCCCCNC(C[C@H](N=C4C5=CC=C(Cl)C=C5)C6=NN=C(C)N6C7=C4C(C)=C(C)S7)=O)=O)C1=O	O=C(N1)CCC(N2C(C3=C(C2=O)C=CC=C3OCCCCCCCCCNC(C[C@H](N=C4C5=CC=C(Cl)C=C5)C6=NN=C(C)N6C7=C4C(C)=C(C)S7)=O)=O)C1=O	ZXH-2-43	https://www.ncbi.nlm.nih.gov/pubmed/29892083	Dana-Farber Cancer Institute	CRBN	Thalidomide	BRD4	798.356	5.73	2	10	16	162.2	1	4	3.84	20.84	11	Alkyl	4	7
O=C(CCC1N2C(C3=C(C=C(OCCCCCCCCCNC(C[C@@H](C4=NN=C(N4C5=C6C(C)=C(S5)C)C)N=C6C7=CC=C(C=C7)Cl)=O)C=C3)C2=O)=O)NC1=O	O=C(CCC1N2C(C3=C(C=C(OCCCCCCCCCNC(C[C@@H](C4=NN=C(N4C5=C6C(C)=C(S5)C)C)N=C6C7=CC=C(C=C7)Cl)=O)C=C3)C2=O)=O)NC1=O	ZXH-2-45	https://www.ncbi.nlm.nih.gov/pubmed/29892083	Dana-Farber Cancer Institute	CRBN	Thalidomide	BRD4	798.356	5.72	2	10	16	162.2	1	4	3.84	20.84	11	Alkyl	4	7
CN(S(C)(=O)=O)C1=CC(CNC2=C(C(F)(F)F)C=NC(NC3=CC=C(OCCOCCC(N[C@@H](C(C)(C)C)C(N4C[C@@H](O)C[C@H]4C(NCC(C=C5)=CC=C5C6=C(C)N=CS6)=O)=O)=O)C=C3)=N2)=CC=C1	CN(S(C)(=O)=O)C1=CC(CNC2=C(C(F)(F)F)C=NC(NC3=CC=C(OCCOCCC(N[C@@H](C(C)(C)C)C(N4C[C@@H](O)C[C@H]4C(NCC(C=C5)=CC=C5C6=C(C)N=CS6)=O)=O)=O)C=C3)=N2)=CC=C1	FAK PROTAC-3	https://www.ncbi.nlm.nih.gov/pubmed/30444612	Yale University	VHL	VH032	FAK	996.135	5.3	5	16	25	215.72	2	5	3.84	30.84	7	PEG2	5	7
CN(S(C)(=O)=O)C1=CC(CNC2=C(C(F)(F)F)C=NC(NC3=CC=C(OCCCOCCC(N[C@@H](C(C)(C)C)C(N4C[C@@H](O)C[C@H]4C(NCC(C=C5)=CC=C5C6=C(C)N=CS6)=O)=O)=O)C=C3)=N2)=CC=C1	CN(S(C)(=O)=O)C1=CC(CNC2=C(C(F)(F)F)C=NC(NC3=CC=C(OCCCOCCC(N[C@@H](C(C)(C)C)C(N4C[C@@H](O)C[C@H]4C(NCC(C=C5)=CC=C5C6=C(C)N=CS6)=O)=O)=O)C=C3)=N2)=CC=C1	FAK PROTAC-4	https://www.ncbi.nlm.nih.gov/pubmed/30444612	Yale University	VHL	VH032	FAK	1010.16	5.75	5	16	26	215.72	2	5	3.9	31.9	8	PEG3	5	7
CN(CCCNC1=C(Br)C=NC(NC2=CC=C(OCCCOCCCOCCCOCCCOCCC(=O)N[C@H](C(=O)N3C[C@H](O)C[C@H]3C(=O)NCC3=CC=C(C=C3)C3=C(C)N=CS3)C(C)(C)C)C=C2)=N1)C(=O)C1CCC1	CN(CCCNC1=C(Br)C=NC(NC2=CC=C(OCCCOCCCOCCCOCCCOCCC(=O)N[C@H](C(=O)N3C[C@H](O)C[C@H]3C(=O)NCC3=CC=C(C=C3)C3=C(C)N=CS3)C(C)(C)C)C=C2)=N1)C(=O)C1CCC1	3m	https://www.ncbi.nlm.nih.gov/pubmed/28692295	Yale University	VHL	VH032	TBK1	1151.27	6.54	5	15	39	226.34	2	4	4.03	44.03	20	PEG3	5	7
CN(CCCNC1=NC(NC2=CC=C(OCCCOCCCCOCCCOCC(=O)N[C@H](C(=O)N3C[C@H](O)C[C@H]3C(=O)NCC3=CC=C(C=C3)C3=C(C)N=CS3)C(C)(C)C)C=C2)=NC=C1Cl)C(=O)C1CCC1	CN(CCCNC1=NC(NC2=CC=C(OCCCOCCCCOCCCOCC(=O)N[C@H](C(=O)N3C[C@H](O)C[C@H]3C(=O)NCC3=CC=C(C=C3)C3=C(C)N=CS3)C(C)(C)C)C=C2)=NC=C1Cl)C(=O)C1CCC1	5c	https://www.ncbi.nlm.nih.gov/pubmed/28692295	Yale University	VHL	VH032	TBK1	1048.74	6.17	5	14	35	217.11	2	4	4.14	40.14	16	PEG4 PEG3	5	7
CN(CCCNC1=NC(NC2=CC=C(OCCCOCCCCOCCCOCC(=O)N[C@H](C(=O)N3C[C@H](O)C[C@H]3C(=O)NCC3=CC=C(C=C3)C3=C(C)N=CS3)C(C)(C)C)C=C2)=NC=C1C(F)(F)F)C(=O)C1CCC1	CN(CCCNC1=NC(NC2=CC=C(OCCCOCCCCOCCCOCC(=O)N[C@H](C(=O)N3C[C@H](O)C[C@H]3C(=O)NCC3=CC=C(C=C3)C3=C(C)N=CS3)C(C)(C)C)C=C2)=NC=C1C(F)(F)F)C(=O)C1CCC1	5e	https://www.ncbi.nlm.nih.gov/pubmed/28692295	Yale University	VHL	VH032	TBK1	1082.3	6.62	5	17	36	217.11	2	4	4.41	41.41	16	PEG4 PEG3	5	7
CN(CCCNC1=NC(NC2=CC=C(OCCCOCCCCOCCCOCC(=O)N[C@H](C(=O)N3C[C@H](O)C[C@H]3C(=O)NCC3=CC=C(C=C3)C3=C(C)N=CS3)C(C)(C)C)C=C2)=NC=C1I)C(=O)C1CCC1	CN(CCCNC1=NC(NC2=CC=C(OCCCOCCCCOCCCOCC(=O)N[C@H](C(=O)N3C[C@H](O)C[C@H]3C(=O)NCC3=CC=C(C=C3)C3=C(C)N=CS3)C(C)(C)C)C=C2)=NC=C1I)C(=O)C1CCC1	5d	https://www.ncbi.nlm.nih.gov/pubmed/28692295	Yale University	VHL	VH032	TBK1	1140.19	6.2	5	14	35	217.11	2	4	4.46	40.46	16	PEG4 PEG3	5	7
COC1=C(OC)C(OC)=CC([C@@H](C(N2CCCC[C@H]2C(O[C@@H](C3=CC=CC(OCC(NCCCOCCOCCOCCCOC4=CC=CC(C(N5C6CC(NC(C6)=O)=O)=O)=C4C5=O)=O)=C3)CCC7=CC=C(OC)C(OC)=C7)=O)=O)CC)=C1	COC1=C(OC)C(OC)=CC([C@@H](C(N2CCCC[C@H]2C(O[C@@H](C3=CC=CC(OCC(NCCCOCCOCCOCCCOC4=CC=CC(C(N5C6CC(NC(C6)=O)=O)=O)=C4C5=O)=O)=C3)CCC7=CC=C(OC)C(OC)=C7)=O)=O)CC)=C1	dTAG 48	https://www.ncbi.nlm.nih.gov/pubmed/29581585	Dana-Farber Cancer Institute	CRBN	Thalidomide	FKBP12 F36V	1153.29	5.21	2	17	36	251.56	1	4	4.58	41.58	15	PEG2 alkyl	4	7
CN(CCCNC1=C(Br)C=NC(NC2=CC=C(OCCOCCOCCCCOCCCCOCCOCC(=O)N[C@H](C(=O)N3C[C@H](O)C[C@H]3C(=O)NCC3=CC=C(C=C3)C3=C(C)N=CS3)C(C)(C)C)C=C2)=N1)C(=O)C1CCC1	CN(CCCNC1=C(Br)C=NC(NC2=CC=C(OCCOCCOCCCCOCCCCOCCOCC(=O)N[C@H](C(=O)N3C[C@H](O)C[C@H]3C(=O)NCC3=CC=C(C=C3)C3=C(C)N=CS3)C(C)(C)C)C=C2)=N1)C(=O)C1CCC1	3o	https://www.ncbi.nlm.nih.gov/pubmed/28692295	Yale University	VHL	VH032	TBK1	1181.3	6.33	5	16	41	235.57	2	4	4.66	46.66	22	PEG2 PEG4	4	7
CN(CCCNC1=C(Br)C=NC(NC2=CC=C(OCCOCCCCOCCCCOCCOCC(=O)N[C@H](C(=O)N3C[C@H](O)C[C@H]3C(=O)NCC3=CC=C(C=C3)C3=C(C)N=CS3)C(C)(C)C)C=C2)=N1)C(=O)C1CCC1	CN(CCCNC1=C(Br)C=NC(NC2=CC=C(OCCOCCCCOCCCCOCCOCC(=O)N[C@H](C(=O)N3C[C@H](O)C[C@H]3C(=O)NCC3=CC=C(C=C3)C3=C(C)N=CS3)C(C)(C)C)C=C2)=N1)C(=O)C1CCC1	3l	https://www.ncbi.nlm.nih.gov/pubmed/28692295	Yale University	VHL	VH032	TBK1	1137.25	6.29	5	15	38	226.34	2	4	4.71	43.71	19	PEG2 PEG4	5	7
FC1=CC=C(C=C1)NC(C2(CC2)C(NC3=CC=C(C(F)=C3)OC4=C5C=C(C(OCCCOCCOCCCC(NC(C(N6C(CC(C6)O)C(NCC7=CC=C(C=C7)C8=C(N=CS8)C)=O)=O)C(C)(C)C)=O)=CC5=NC=C4)OC)=O)=O	FC1=CC=C(C=C1)NC(C2(CC2)C(NC3=CC=C(C(F)=C3)OC4=C5C=C(C(OCCCOCCOCCCC(NC(C(N6C(CC(C6)O)C(NCC7=CC=C(C=C7)C8=C(N=CS8)C)=O)=O)C(C)(C)C)=O)=CC5=NC=C4)OC)=O)=O	SJF6690	https://www.ncbi.nlm.nih.gov/pubmed/30631068	Yale University	VHL	VH032	p38	1106.25	6.98	5	15	31	227.81	4	6	5.65	39.65	11	PEG2 PEG3	5	7
FC1=CC=C(NC(C2(C(NC3=CC=C(OC4=C(C=C(OC)C(OCCCCOCCCCOCC(NC(C(C)(C)C)C(N5C(C(NCC6=CC=C(C7=C(C)N=CS7)C=C6)=O)CC(O)C5)=O)=O)=C8)C8=NC=C4)C(F)=C3)=O)CC2)=O)C=C1	FC1=CC=C(NC(C2(C(NC3=CC=C(OC4=C(C=C(OC)C(OCCCCOCCCCOCC(NC(C(C)(C)C)C(N5C(C(NCC6=CC=C(C7=C(C)N=CS7)C=C6)=O)CC(O)C5)=O)=O)=C8)C8=NC=C4)C(F)=C3)=O)CC2)=O)C=C1	SJFalpha	https://www.ncbi.nlm.nih.gov/pubmed/30631068	Yale University	VHL	VH032	p38alpha	1120.28	7.16	5	15	32	227.81	4	6	6.22	41.22	13	PEG4	5	7
COC1=C(OC)C(OC)=CC([C@@H](C(N2CCCC[C@H]2C(O[C@@H](C3=CC=CC(OCC(NCCCCCCCCNC4=CC=CC(C(N5C6CC(NC(C6)=O)=O)=O)=C4C5=O)=O)=C3)CCC7=CC=C(OC)C(OC)=C7)=O)=O)CC)=C1	COC1=C(OC)C(OC)=CC([C@@H](C(N2CCCC[C@H]2C(O[C@@H](C3=CC=CC(OCC(NCCCCCCCCNC4=CC=CC(C(N5C6CC(NC(C6)=O)=O)=O)=C4C5=O)=O)=C3)CCC7=CC=C(OC)C(OC)=C7)=O)=O)CC)=C1	dTAG 51	https://www.ncbi.nlm.nih.gov/pubmed/29581585	Dana-Farber Cancer Institute	CRBN	Pomalidomide	FKBP12 F36V	1076.25	6.44	3	14	31	226.67	1	4	7.23	39.23	9	Alkyl	5	7
CN(CCCNC1=NC(NC2=CC=C(OCCOCCOCCOCCOCCOCCOCC(=O)N[C@H](C(=O)N3C[C@H](O)C[C@H]3C(=O)NCC3=CC=C(C=C3)C3=C(C)N=CS3)C(C)(C)C)C=C2)=NC=C1Br)C(=O)C1CCC1	CN(CCCNC1=NC(NC2=CC=C(OCCOCCOCCOCCOCCOCCOCC(=O)N[C@H](C(=O)N3C[C@H](O)C[C@H]3C(=O)NCC3=CC=C(C=C3)C3=C(C)N=CS3)C(C)(C)C)C=C2)=NC=C1Br)C(=O)C1CCC1	3n	https://www.ncbi.nlm.nih.gov/pubmed/28692295	Yale University	VHL	VH032	TBK1	1169.24	5.2	5	17	40	244.8	2	4	3.46	44.46	21	PEG2	4	6.33333
CN(CCCNC1=C(C=C)C=NC(NC2=CC=C(OCCCOCCCCOCCCOCC(=O)N[C@H](C(=O)N3C[C@H](O)C[C@H]3C(=O)NCC3=CC=C(C=C3)C3=C(C)N=CS3)C(C)(C)C)C=C2)=N1)C(=O)C1CCC1	CN(CCCNC1=C(C=C)C=NC(NC2=CC=C(OCCCOCCCCOCCCOCC(=O)N[C@H](C(=O)N3C[C@H](O)C[C@H]3C(=O)NCC3=CC=C(C=C3)C3=C(C)N=CS3)C(C)(C)C)C=C2)=N1)C(=O)C1CCC1	5i	https://www.ncbi.nlm.nih.gov/pubmed/28692295	Yale University	VHL	VH032	TBK1	1040.34	6.04	5	14	36	217.11	2	4	4.26	41.26	16	PEG4 PEG3	5	6.33333
FC1=CC=C(NC(C2(C(NC3=CC=C(OC4=C(C=C(OC)C(OCCOCCOCCOC5=C(CNC(C6CC(O)CN6C(C(C(C)C)N7C(C(C=CC=C8)=C8C7)=O)=O)=O)C=CC(C9=C(C)N=CS9)=C5)=C%10)C%10=NC=C4)C(F)=C3)=O)CC2)=O)C=C1	FC1=CC=C(NC(C2(C(NC3=CC=C(OC4=C(C=C(OC)C(OCCOCCOCCOC5=C(CNC(C6CC(O)CN6C(C(C(C)C)N7C(C(C=CC=C8)=C8C7)=O)=O)=O)C=CC(C9=C(C)N=CS9)=C5)=C%10)C%10=NC=C4)C(F)=C3)=O)CC2)=O)C=C1	SJFdelta	https://www.ncbi.nlm.nih.gov/pubmed/30631068	Yale University	VHL	Phenyl-VH 033	p38delta	1168.28	7.44	4	16	29	228.25	3	7	6.49	39.49	10	PEG2	5	6.33333
O=C(NC1=CC=CC(C(N2C(CC3)C(NC3=O)=O)=O)=C1C2=O)CCOCCOCCOCCNC(C4=CC=C(NC5=NC=C(C(F)(F)F)C(OC6=CC=CC(CC7)=C6C7=O)=N5)C(OC)=C4)=O	O=C(NC1=CC=CC(C(N2C(CC3)C(NC3=O)=O)=O)=C1C2=O)CCOCCOCCOCCNC(C4=CC=C(NC5=NC=C(C(F)(F)F)C(OC6=CC=CC(CC7)=C6C7=O)=N5)C(OC)=C4)=O	BI-3663	https://www.ncbi.nlm.nih.gov/pubmed/30739444/	Uni Dundee	CRBN	Pomalidomide	PTK2	917.852	3.7	4	18	23	241.72	2	4	3.62	27.62	13	PEG2	4	6.33333
ClC1=CC=C(C2=N[C@](C3=NN=C(C)N3C4=C2C(C)=C(C)S4)(CC(NCCOCCOCCOCCOCC(N[C@@H](C(C)(C)C)C(N5C[C@@H](O)C[C@@H]5C(NCC6=CC=C(C7=C(C)N=CS7)C=C6)=O)=O)=O)=O)[H])C=C1	ClC1=CC=C(C2=N[C@](C3=NN=C(C)N3C4=C2C(C)=C(C)S4)(CC(NCCOCCOCCOCCOCC(N[C@@H](C(C)(C)C)C(N5C[C@@H](O)C[C@@H]5C(NCC6=CC=C(C7=C(C)N=CS7)C=C6)=O)=O)=O)=O)[H])C=C1	MZ2	https://www.ncbi.nlm.nih.gov/pmc/articles/PMC5788402/	University of Dundee	VHL	VH032	BET	1046.7	4.99	4	14	28	217.44	3	5	1.59	34.41	15	PEG2	4	6.2
ClC1=CC=C(C=C1)C2=N[C@]([H])(C3=NN=C(N3C4=C2C(C)=C(S4)C)C)CC(NCCOCCOCCOCC(N[C@H](C(N5C[C@H](C[C@@H]5C(NCC6=CC=C(C=C6)C7=C(N=CS7)C)=O)O)=O)C(C)(C)C)=O)=O	ClC1=CC=C(C=C1)C2=N[C@]([H])(C3=NN=C(N3C4=C2C(C)=C(S4)C)C)CC(NCCOCCOCCOCC(N[C@H](C(N5C[C@H](C[C@@H]5C(NCC6=CC=C(C=C6)C7=C(N=CS7)C)=O)O)=O)C(C)(C)C)=O)=O	MZ1	https://www.ncbi.nlm.nih.gov/pmc/articles/PMC5788402/	University of Dundee	VHL	VH032	BET	1002.64	5.09	4	13	25	208.21	3	5	1.75	31.25	12	PEG2	4	6.2
O=C(CCC1N(C(C2=C3C(OCC(NCCCCNC(C4=NC5=C(C6=CC(OC)=C(C=C6N5)C7=C(ON=C7C)C)C(NC8=CC(C9CC9)=NN8CC)=N4)=O)=O)=CC=C2)=O)C3=O)NC1=O	O=C(CCC1N(C(C2=C3C(OCC(NCCCCNC(C4=NC5=C(C6=CC(OC)=C(C=C6N5)C7=C(ON=C7C)C)C(NC8=CC(C9CC9)=NN8CC)=N4)=O)=O)=CC=C2)=O)C3=O)NC1=O	Compound 9	https://www.ncbi.nlm.nih.gov/pubmed/?term=Discovery+of+a+Small-Molecule+Degrader+of+Bromodomain+and+Extra-Terminal+(BET)+Proteins+with+Picomolar+Cellular+Potencies+and+Capable	University of Michigan	CRBN	Thalidomide	BET	871.912	3.37	5	16	18	246.18	2	6	2.11	24.89	9	Alkyl	4	6.2
O=C1NC(CCC1N2C(C(C=CC=C3OCCCC4=CC=C(N(C)CCCN(C)C(C5=CC=C(C6CN(C)CC(NC7C(Br)C(N(C)N=C7)=O)C6)C=C5)=O)C=C4)=C3C2=O)=O)=O	O=C1NC(CCC1N2C(C(C=CC=C3OCCCC4=CC=C(N(C)CCCN(C)C(C5=CC=C(C6CN(C)CC(NC7C(Br)C(N(C)N=C7)=O)C6)C=C5)=O)C=C4)=C3C2=O)=O)=O	GSK 699	https://www.ncbi.nlm.nih.gov/pubmed/30200762	GSK	CRBN	Thalidomide	PCAF GCN5	897.872	3.51	2	11	16	164.27	0	3	3.06	19.06	14	Alkyl benzyl	4	6.2
CC1=C(SC=N1)C2=CC=C(C=C2)CNC([C@@H]3C[C@H](CN3C([C@@H](NC(COCCOCCOCCOCCOC4=CC(N=CC=C5NC6=CC(N=CS7)=C7C=C6)=C5C=C4S(=O)(C(C)(C)C)=O)=O)C(C)(C)C)=O)O)=O	CC1=C(SC=N1)C2=CC=C(C=C2)CNC([C@@H]3C[C@H](CN3C([C@@H](NC(COCCOCCOCCOCCOC4=CC(N=CC=C5NC6=CC(N=CS7)=C7C=C6)=C5C=C4S(=O)(C(C)(C)C)=O)=O)C(C)(C)C)=O)O)=O	PROTAC_RIPK2	https://www.ncbi.nlm.nih.gov/pubmed/26075522	Yale University	VHL	VH032	RIPK2	1060.31	5.9	4	15	29	228.14	2	6	3.89	35.89	15	PEG2	4	6.2
COC1=C(OC)C(OC)=CC([C@@H](C(N2CCCC[C@H]2C(O[C@@H](C3=CC=CC=C3OCC(NCCCCCCOC4=CC=CC(C(N5C6CC(NC(C6)=O)=O)=O)=C4C5=O)=O)CCC7=CC=C(OC)C(OC)=C7)=O)=O)CC)=C1	COC1=C(OC)C(OC)=CC([C@@H](C(N2CCCC[C@H]2C(O[C@@H](C3=CC=CC=C3OCC(NCCCCCCOC4=CC=CC(C(N5C6CC(NC(C6)=O)=O)=O)=C4C5=O)=O)CCC7=CC=C(OC)C(OC)=C7)=O)=O)CC)=C1	dTAG 13	https://www.ncbi.nlm.nih.gov/pubmed/29581585	Dana-Farber Cancer Institute	CRBN	Thalidomide	FKBP12 F36V	1049.18	5.78	2	14	29	223.87	1	4	6.06	36.06	8	Alkyl	5	6.2
O=C1C2=C(C=C(C=C2)NC(COCCCCOCCCCN3CCC(CC3)N4C5=C(C(C6=CC=C(C=C6)OC7=CC=CC=C7)=N4)C(N)=NC=N5)=O)C(N1C8CCC(NC8=O)=O)=O	O=C1C2=C(C=C(C=C2)NC(COCCCCOCCCCN3CCC(CC3)N4C5=C(C(C6=CC=C(C=C6)OC7=CC=CC=C7)=N4)C(N)=NC=N5)=O)C(N1C8CCC(NC8=O)=O)=O	MT-809	https://www.ncbi.nlm.nih.gov/pubmed/29851337	Yale University	CRBN	Pomalidomide	BTK	843.942	3.76	3	14	19	209.92	1	5	0.86	26.14	13	PEG4	4	6
O=C1C2=CC=CC(C#CCCCN3C=C(C#CC4=C(CC5=CC=CC=C5)C(COCC6=NN=C(C)N67)=C7S4)C=N3)=C2CN1C8C(NC(CC8)=O)=O	O=C1C2=CC=CC(C#CCCCN3C=C(C#CC4=C(CC5=CC=CC=C5)C(COCC6=NN=C(C)N67)=C7S4)C=N3)=C2CN1C8C(NC(CC8)=O)=O	QCA570	https://pubs.acs.org/doi/10.1021/acs.jmedchem.8b00506	University of Michigan	CRBN	Based on Lenalidomide	BET	695.798	4.26	1	9	10	119.27	0	5	2.66	15.34	5	alkyne-alkyl	2	6
O=C1NC(C(CC1)N2C(C3=C(C2=O)C=CC=C3NCC(NCCOCCOCCN4CCN(CC4)C5=CC=C(C=C5)NC6=NC(NC7=C(C=CC=C7)S(C(C)C)(=O)=O)=C(C=N6)Cl)=O)=O)=O	O=C1NC(C(CC1)N2C(C3=C(C2=O)C=CC=C3NCC(NCCOCCOCCN4CCN(CC4)C5=CC=C(C=C5)NC6=NC(NC7=C(C=CC=C7)S(C(C)C)(=O)=O)=C(C=N6)Cl)=O)=O)=O	TL12-186	https://www.ncbi.nlm.nih.gov/pubmed/29129717	Dana-Farber Cancer Institute	CRBN	Pomalidomide	Multi-kinase	931.463	3.32	5	16	21	232.54	1	4	3	25	12	PEG2	4	6
O=C(N(C1=O)C2CCC(NC2=O)=O)C3=C1C=CC=C3NCC(NCCOCCOCCN4CCN(C5=CC=C(NC6=NC(NC7=C(S(=O)(C(C)C)=O)C=CC=C7)=C(Cl)C=N6)C=C5)CC4)=O	O=C(N(C1=O)C2CCC(NC2=O)=O)C3=C1C=CC=C3NCC(NCCOCCOCCN4CCN(C5=CC=C(NC6=NC(NC7=C(S(=O)(C(C)C)=O)C=CC=C7)=C(Cl)C=N6)C=C5)CC4)=O	TL12-186	https://www.ncbi.nlm.nih.gov/pubmed/29129717	Dana-Farber Cancer Institute	CRBN	Pomalidomide	Multi-kinase	931.463	3.32	5	16	21	232.54	1	4	3	25	12	PEG2	4	6
O=C(N(C1=O)C2CCC(NC2=O)=O)C3=C1C=CC=C3NCCOCCOCCOCCOC4=CC=C(NC(C[C@]5([H])C6=NN=C(C)N6C7=C(C(C)=C(C)S7)C(C8=CC=C(Cl)C=C8)=N5)=O)C=C4	O=C(N(C1=O)C2CCC(NC2=O)=O)C3=C1C=CC=C3NCCOCCOCCOCCOC4=CC=C(NC(C[C@]5([H])C6=NN=C(C)N6C7=C(C(C)=C(C)S7)C(C8=CC=C(Cl)C=C8)=N5)=O)C=C4	ARV-825	https://www.ncbi.nlm.nih.gov/pubmed/26051217	Yale University	CRBN	Pomalidomide	BET	923.439	4.84	3	14	20	201.92	1	5	3.33	25.33	17	PEG2 benzyl	4	6
O=C(CCC1N(C2=O)CC3=C2C=CC=C3CCCCNC(C4=NC5=C(C6=CC(OC)=C(C=C6N5)C7=C(ON=C7C)C)C(NC8=CC(C9CC9)=NN8CC)=N4)=O)NC1=O	O=C(CCC1N(C2=O)CC3=C2C=CC=C3CCCCNC(C4=NC5=C(C6=CC(OC)=C(C=C6N5)C7=C(ON=C7C)C)C(NC8=CC(C9CC9)=NN8CC)=N4)=O)NC1=O	Compound 24	https://www.ncbi.nlm.nih.gov/pubmed/?term=Discovery+of+a+Small-Molecule+Degrader+of+Bromodomain+and+Extra-Terminal+(BET)+Proteins+with+Picomolar+Cellular+Potencies+and+Capable	University of Michigan	CRBN	Based on Lenalidomide	BET	784.878	4.47	4	13	14	190.78	1	6	4.06	21.06	5	Alkyl	5	6
O=C(CCC1N2CC3=C(C=CC=C3CCCCCNC(C4=NC(NC5=CC(C6CC6)=NN5CC)=C7C8=C(C=C(C(OC)=C8)C9=C(C)ON=C9C)NC7=N4)=O)C2=O)NC1=O	O=C(CCC1N2CC3=C(C=CC=C3CCCCCNC(C4=NC(NC5=CC(C6CC6)=NN5CC)=C7C8=C(C=C(C(OC)=C8)C9=C(C)ON=C9C)NC7=N4)=O)C2=O)NC1=O	Compound 23	https://www.ncbi.nlm.nih.gov/pubmed/?term=Discovery+of+a+Small-Molecule+Degrader+of+Bromodomain+and+Extra-Terminal+(BET)+Proteins+with+Picomolar+Cellular+Potencies+and+Capable	University of Michigan	CRBN	Thalidomide	BET	798.905	4.66	4	13	15	190.78	1	6	4.48	22.48	6	Alkyl	5	6
O=C(CCC1N(C2=O)CC3=C2C=CC=C3CCCCCCNC(C4=NC5=C(C6=CC(OC)=C(C=C6N5)C7=C(ON=C7C)C)C(NC8=CC(C9CC9)=NN8CC)=N4)=O)NC1=O	O=C(CCC1N(C2=O)CC3=C2C=CC=C3CCCCCCNC(C4=NC5=C(C6=CC(OC)=C(C=C6N5)C7=C(ON=C7C)C)C(NC8=CC(C9CC9)=NN8CC)=N4)=O)NC1=O	Compound 21	https://www.ncbi.nlm.nih.gov/pubmed/?term=Discovery+of+a+Small-Molecule+Degrader+of+Bromodomain+and+Extra-Terminal+(BET)+Proteins+with+Picomolar+Cellular+Potencies+and+Capable	University of Michigan	CRBN	Based on Lenalidomide	BET	812.932	5.17	4	13	16	190.78	1	6	4.9	23.9	7	Alkyl	5	6
OC1=CC=C2C(SC(C3=CC=C(O)C=C3)=C2C(C4=CC=C(OCCN(CCCCCOCC(N[C@@H](C(C)(C)C)C(N5[C@H](C(N[C@@H](C)C6=CC=C(C7=C(C)N=CS7)C=C6)=O)C[C@@H](O)C5)=O)=O)CC)C=C4)=O)=C1	OC1=CC=C2C(SC(C3=CC=C(O)C=C3)=C2C(C4=CC=C(OCCN(CCCCCOCC(N[C@@H](C(C)(C)C)C(N5[C@H](C(N[C@@H](C)C6=CC=C(C7=C(C)N=CS7)C=C6)=O)C[C@@H](O)C5)=O)=O)CC)C=C4)=O)=C1	ERD-308	https://pubs.acs.org/doi/abs/10.1021/acs.jmedchem.8b01572	Uni Michigan	VHL	VH032	ER	1004.27	7.09	5	11	26	190.33	2	6	5.87	34.87	8	alkyl ether	5	6
CC(C)([C@H](NC(COCCOCCOCCNC(C1=CC=C(C=C1)C2=CC3=C(C=C2)N(C(C)=O)[C@@H](C)C[C@H]3NC4=CC=C(C=C4)Cl)=O)=O)C(N5C[C@@H](O)C[C@@H]5C(NCC6=CC=C(C7=C(C)N=CS7)C=C6)=O)=O)C	CC(C)([C@H](NC(COCCOCCOCCNC(C1=CC=C(C=C1)C2=CC3=C(C=C2)N(C(C)=O)[C@@H](C)C[C@H]3NC4=CC=C(C=C4)Cl)=O)=O)C(N5C[C@@H](O)C[C@@H]5C(NCC6=CC=C(C7=C(C)N=CS7)C=C6)=O)=O)C	MZP-54	https://www.ncbi.nlm.nih.gov/pmc/articles/PMC5788402/	University of Dundee	VHL	VH032	BET	1036.68	5.82	5	11	27	200.23	3	5	4.19	33.19	12	PEG2	5	5.8
CN(S(C)(=O)=O)C1=CC(CNC2=C(C(F)(F)F)C=NC(NC3=CC=C(OCCOCCOCCOCCOCCC(NCCOC4=C(C(N(C5C(NC(CC5)=O)=O)C6=O)=O)C6=CC=C4)=O)C=C3)=N2)=CC=C1	CN(S(C)(=O)=O)C1=CC(CNC2=C(C(F)(F)F)C=NC(NC3=CC=C(OCCOCCOCCOCCOCCC(NCCOC4=C(C(N(C5C(NC(CC5)=O)=O)C6=O)=O)C6=CC=C4)=O)C=C3)=N2)=CC=C1	FAK PROTAC-10	https://www.ncbi.nlm.nih.gov/pubmed/30444612	Yale University	CRBN	Thalidomide	FAK	1015.03	3.29	4	20	30	254.19	1	4	1.91	35.09	20	PEG2 Alkyl Amide	4	5.66667
O=C(CC1)NC(C1N2C(C(C=CC=C3OCC(NCCCCCCCCNC(C[C@@H](C4=NN=C(N4C5=C6C(C)=C(S5)C)C)N=C6C(C=C7)=CC=C7Cl)=O)=O)=C3C2=O)=O)=O	O=C(CC1)NC(C1N2C(C(C=CC=C3OCC(NCCCCCCCCNC(C[C@@H](C4=NN=C(N4C5=C6C(C)=C(S5)C)C)N=C6C(C=C7)=CC=C7Cl)=O)=O)=C3C2=O)=O)=O	dBET6	https://www.ncbi.nlm.nih.gov/pubmed/29892083	Dana-Farber Cancer Institute	CRBN	Thalidomide	BRD4	841.381	4.7	3	11	18	191.3	2	4	2.37	22.63	13	Alkyl	5	5.66667
O=C(NC1=O)CCC1N2C(C3=C(C2=O)C(NCCCCCCCCNC(C4=C(C)C(C(C5=CC=C(Cl)C=C5)=N[C@H](C6=NN=C(N76)C)CC(OC)=O)=C7S4)=O)=CC=C3)=O	O=C(NC1=O)CCC1N2C(C3=C(C2=O)C(NCCCCCCCCNC(C4=C(C)C(C(C5=CC=C(Cl)C=C5)=N[C@H](C6=NN=C(N76)C)CC(OC)=O)=C7S4)=O)=CC=C3)=O	dBET70	https://www.ncbi.nlm.nih.gov/pubmed/29892083	Dana-Farber Cancer Institute	CRBN	Pomalidomide	BRD4	827.354	5.18	3	11	17	191.3	1	4	3.16	21.16	9	Alkyl	5	5.66667
CN(S(C)(=O)=O)C1=CC(CNC2=C(C(F)(F)F)C=NC(NC3=CC=C(OCCOCCOCCOCCOCCC(N[C@@H](C(C)(C)C)C(N4C[C@@H](O)C[C@H]4C(NCC(C=C5)=CC=C5C6=C(C)N=CS6)=O)=O)=O)C=C3)=N2)=CC=C1	CN(S(C)(=O)=O)C1=CC(CNC2=C(C(F)(F)F)C=NC(NC3=CC=C(OCCOCCOCCOCCOCCC(N[C@@H](C(C)(C)C)C(N4C[C@@H](O)C[C@H]4C(NCC(C=C5)=CC=C5C6=C(C)N=CS6)=O)=O)=O)C=C3)=N2)=CC=C1	FAK PROTAC-6	https://www.ncbi.nlm.nih.gov/pubmed/30444612	Yale University	VHL	VH032	FAK	1128.29	5.49	5	19	34	243.41	2	5	3.7	39.7	16	PEG2	4	5.66667
CN(CCCNC1=C(C=NC(NC2=CC=C(OCCCOCCCCOCCCOCC(=O)N[C@H](C(=O)N3C[C@H](O)C[C@H]3C(=O)NCC3=CC=C(C=C3)C3=C(C)N=CS3)C(C)(C)C)C=C2)=N1)C1CC1)C(=O)C1CCC1	CN(CCCNC1=C(C=NC(NC2=CC=C(OCCCOCCCCOCCCOCC(=O)N[C@H](C(=O)N3C[C@H](O)C[C@H]3C(=O)NCC3=CC=C(C=C3)C3=C(C)N=CS3)C(C)(C)C)C=C2)=N1)C1CC1)C(=O)C1CCC1	5j	https://www.ncbi.nlm.nih.gov/pubmed/28692295	Yale University	VHL	VH032	TBK1	1054.36	6.39	5	14	36	217.11	2	4	4.31	41.31	16	PEG4 PEG3	5	5.66667
ClC1=CC=C2C(NC([C@@]23C4(CCCCC4)N[C@@H](C(NC5=CC=C(C(NCCCC#CC6=CC=CC(C7=O)=C6CN7C8C(NC(CC8)=O)=O)=O)C=C5)=O)[C@@H]3C9=CC=CC(Cl)=C9F)=O)=C1	ClC1=CC=C2C(NC([C@@]23C4(CCCCC4)N[C@@H](C(NC5=CC=C(C(NCCCC#CC6=CC=CC(C7=O)=C6CN7C8C(NC(CC8)=O)=O)=O)C=C5)=O)[C@@H]3C9=CC=CC(Cl)=C9F)=O)=C1	MD-224	https://www.ncbi.nlm.nih.gov/pubmed/30525597/	Uni Michigan	CRBN	Lenalidomide	MDM2	889.806	5.59	5	8	12	165.81	2	4	4.97	17.97	6	alkyne	4	5.66667
ClC1=CC=C2C(NC([C@@]23C4(CCCCC4)N[C@@H](C(NC5=CC=C(C(NCCCCCC6=CC=CC(C7=O)=C6CN7C8C(NC(CC8)=O)=O)=O)C=C5)=O)[C@@H]3C9=CC=CC(Cl)=C9F)=O)=C1	ClC1=CC=C2C(NC([C@@]23C4(CCCCC4)N[C@@H](C(NC5=CC=C(C(NCCCCCC6=CC=CC(C7=O)=C6CN7C8C(NC(CC8)=O)=O)=O)C=C5)=O)[C@@H]3C9=CC=CC(Cl)=C9F)=O)=C1	MD-222	https://www.ncbi.nlm.nih.gov/pubmed/30525597/	Uni Michigan	CRBN	Lenalidomide	MDM2	893.838	5.91	5	8	13	165.81	2	4	5.38	19.38	6	alkyl	4	5.66667
FC1=CC=C(C=C1)NC(C2(CC2)C(NC3=CC=C(C(F)=C3)OC4=C5C=C(C(OCCOCCOCCCC(NC(C(N6C(CC(C6)O)C(NCC7=CC=C(C=C7)C8=C(N=CS8)C)=O)=O)C(C)(C)C)=O)=CC5=NC=C4)OC)=O)=O	FC1=CC=C(C=C1)NC(C2(CC2)C(NC3=CC=C(C(F)=C3)OC4=C5C=C(C(OCCOCCOCCCC(NC(C(N6C(CC(C6)O)C(NCC7=CC=C(C=C7)C8=C(N=CS8)C)=O)=O)C(C)(C)C)=O)=CC5=NC=C4)OC)=O)=O	SJF 6693	https://www.ncbi.nlm.nih.gov/pubmed/30631068	Yale University	VHL	VH032	p38	1092.23	6.53	5	15	30	227.81	4	6	5.59	38.59	10	PEG2 PEG3	5	5.66667
OC1=CC=C2C(SC(C3=CC=C(O)C=C3)=C2C(C4=CC=C(OCCN(CCOCCOCC(N[C@@H](C(C)(C)C)C(N5[C@H](C(N[C@@H](C)C6=CC=C(C7=C(C)N=CS7)C=C6)=O)C[C@@H](O)C5)=O)=O)CC)C=C4)=O)=C1	OC1=CC=C2C(SC(C3=CC=C(O)C=C3)=C2C(C4=CC=C(OCCN(CCOCCOCC(N[C@@H](C(C)(C)C)C(N5[C@H](C(N[C@@H](C)C6=CC=C(C7=C(C)N=CS7)C=C6)=O)C[C@@H](O)C5)=O)=O)CC)C=C4)=O)=C1	SW 31	https://pubs.acs.org/doi/abs/10.1021/acs.jmedchem.8b01572	Uni Michigan	VHL	VH032	ER	1006.24	6.18	5	12	26	199.56	2	6	5.59	34.59	8	Peg2	5	5.66667
OC1=CC=C2C(SC(C3=CC=C(O)C=C3)=C2C(C4=CC=C(OCCN(CCCC#CC(C=N5)=CN5CCC(N[C@@H](C(C)(C)C)C(N6[C@H](C(N[C@@H](C)C7=CC=C(C8=C(C)N=CS8)C=C7)=O)C[C@@H](O)C6)=O)=O)CC)C=C4)=O)=C1	OC1=CC=C2C(SC(C3=CC=C(O)C=C3)=C2C(C4=CC=C(OCCN(CCCC#CC(C=N5)=CN5CCC(N[C@@H](C(C)(C)C)C(N6[C@H](C(N[C@@H](C)C7=CC=C(C8=C(C)N=CS8)C=C7)=O)C[C@@H](O)C6)=O)=O)CC)C=C4)=O)=C1	SW 35	https://pubs.acs.org/doi/abs/10.1021/acs.jmedchem.8b01572	Uni Michigan	VHL	VH032	ER	1064.33	7.5	5	12	26	196.7	2	7	6.57	36.57	11	alkyne pyrazole	5	5.66667
OC1=CC=C2C(C(C)=C(C3=CC=C(O)C=C3)N2CC4=CC=C(OCCN(CCCCCCCC(N[C@@H](C(C)(C)C)C(N5[C@H](C(N[C@@H](C)C6=CC=C(C7=C(C)N=CS7)C=C6)=O)C[C@@H](O)C5)=O)=O)CC)C=C4)=C1	OC1=CC=C2C(C(C)=C(C3=CC=C(O)C=C3)N2CC4=CC=C(OCCN(CCCCCCCC(N[C@@H](C(C)(C)C)C(N5[C@H](C(N[C@@H](C)C6=CC=C(C7=C(C)N=CS7)C=C6)=O)C[C@@H](O)C5)=O)=O)CC)C=C4)=C1	SW 40	https://pubs.acs.org/doi/abs/10.1021/acs.jmedchem.8b01572	Uni Michigan	VHL	VH032	ER	985.298	7.71	5	10	26	167.27	2	6	6.63	35.63	8	alkyl	4	5.66667
CC(C)(C)[C@@H](C(N1[C@H](C(N[C@@H](C)C2=CC=C(C3=C(C)N=CS3)C=C2)=O)C[C@@H](O)C1)=O)NC(CCCCCCCN(CC)CCOC4=CC=C([C@@H]5C(C=CC(O)=C6)=C6CC[C@@H]5C7=CC=CC=C7)C=C4)=O	CC(C)(C)[C@@H](C(N1[C@H](C(N[C@@H](C)C2=CC=C(C3=C(C)N=CS3)C=C2)=O)C[C@@H](O)C1)=O)NC(CCCCCCCN(CC)CCOC4=CC=C([C@@H]5C(C=CC(O)=C6)=C6CC[C@@H]5C7=CC=CC=C7)C=C4)=O	SW 41	https://pubs.acs.org/doi/abs/10.1021/acs.jmedchem.8b01572	Uni Michigan	VHL	VH032	ER	956.3	8.56	4	8	25	143.8	2	5	7.11	34.11	8	alkyl	4	5.66667
OC1=CC=C2C(SC(C3=CC=C(O)C=C3)=C2C(C4=CC=C(OCCN(CCCCCCCC(N[C@@H](C(C)(C)C)C(N5[C@H](C(N[C@@H](C)C6=CC=C(C7=C(C)N=CS7)C=C6)=O)C[C@@H](O)C5)=O)=O)CC)C=C4)=O)=C1	OC1=CC=C2C(SC(C3=CC=C(O)C=C3)=C2C(C4=CC=C(OCCN(CCCCCCCC(N[C@@H](C(C)(C)C)C(N5[C@H](C(N[C@@H](C)C6=CC=C(C7=C(C)N=CS7)C=C6)=O)C[C@@H](O)C5)=O)=O)CC)C=C4)=O)=C1	ERD-148	https://pubs.acs.org/doi/abs/10.1021/acs.jmedchem.8b01572	Uni Michigan	VHL	VH032	ER	1002.3	7.94	5	10	26	181.1	2	6	7.2	36.2	8	alkyl	4	5.66667
OC1=CC=C2C(SC(C3=CC=C(O)C=C3)=C2C(C4=CC=C(OCCN(CCCCCCCC(N[C@@H](C(C)(C)C)C(N5[C@H](C(N[C@@H](C)C6=CC=C(C7=C(C)N=CS7)C=C6)=O)C[C@@H](O)C5)=O)=O)C(C)(C)C)C=C4)=O)=C1	OC1=CC=C2C(SC(C3=CC=C(O)C=C3)=C2C(C4=CC=C(OCCN(CCCCCCCC(N[C@@H](C(C)(C)C)C(N5[C@H](C(N[C@@H](C)C6=CC=C(C7=C(C)N=CS7)C=C6)=O)C[C@@H](O)C5)=O)=O)C(C)(C)C)C=C4)=O)=C1	SW 24	https://pubs.acs.org/doi/abs/10.1021/acs.jmedchem.8b01572	Uni Michigan	VHL	VH032	ER	1030.35	8.46	5	10	26	181.1	2	6	7.33	36.33	8	alkyl	4	5.66667
OC1=CC=C2C(SC(C3=CC=C(O)C=C3)=C2C(C4=CC=C(OCCN(CCCCCCCC(N[C@@H](C(C)(C)C)C(N5[C@H](C(N[C@@H](C)C6=CC=C(C7=C(C)N=CS7)C=C6)=O)C[C@@H](O)C5)=O)=O)C(C)C)C=C4)=O)=C1	OC1=CC=C2C(SC(C3=CC=C(O)C=C3)=C2C(C4=CC=C(OCCN(CCCCCCCC(N[C@@H](C(C)(C)C)C(N5[C@H](C(N[C@@H](C)C6=CC=C(C7=C(C)N=CS7)C=C6)=O)C[C@@H](O)C5)=O)=O)C(C)C)C=C4)=O)=C1	SW 23	https://pubs.acs.org/doi/abs/10.1021/acs.jmedchem.8b01572	Uni Michigan	VHL	VH032	ER	1016.33	8.09	5	10	26	181.1	2	6	7.34	36.34	8	alkyl	4	5.66667
OC1=CC=C2C(SC(C3=CC=C(O)C=C3)=C2C(C4=CC=C(OCCN(CCCCCCCC(N[C@@H](C(C)(C)C)C(N5[C@H](C(N[C@@H](C)C6=CC=C(C7=C(C)N=CS7)C=C6)=O)C[C@@H](O)C5)=O)=O)C8CC8)C=C4)=O)=C1	OC1=CC=C2C(SC(C3=CC=C(O)C=C3)=C2C(C4=CC=C(OCCN(CCCCCCCC(N[C@@H](C(C)(C)C)C(N5[C@H](C(N[C@@H](C)C6=CC=C(C7=C(C)N=CS7)C=C6)=O)C[C@@H](O)C5)=O)=O)C8CC8)C=C4)=O)=C1	SW 25	https://pubs.acs.org/doi/abs/10.1021/acs.jmedchem.8b01572	Uni Michigan	VHL	VH032	ER	1014.31	8.25	5	10	26	181.1	2	6	7.51	36.51	8	alkyl	4	5.66667
OC1=CC=C2C(SC(C3=CC=C(O)C=C3)=C2C(C4=CC=C(OCCN(CCCCCCCC(N[C@@H](C(C)(C)C)C(N5[C@H](C(N[C@@H](C)C6=CC=C(C7=C(C)N=CS7)C=C6)=O)C[C@@H](O)C5)=O)=O)C8CCCC8)C=C4)=O)=C1	OC1=CC=C2C(SC(C3=CC=C(O)C=C3)=C2C(C4=CC=C(OCCN(CCCCCCCC(N[C@@H](C(C)(C)C)C(N5[C@H](C(N[C@@H](C)C6=CC=C(C7=C(C)N=CS7)C=C6)=O)C[C@@H](O)C5)=O)=O)C8CCCC8)C=C4)=O)=C1	SW 27	https://pubs.acs.org/doi/abs/10.1021/acs.jmedchem.8b01572	Uni Michigan	VHL	VH032	ER	1042.36	8.73	5	10	26	181.1	2	6	7.54	36.54	8	alkyl	4	5.66667
OC1=CC=C2C(SC(C3=CC=C(O)C=C3)=C2C(C4=CC=C(OCCN(CCCCCCCC(N[C@@H](C(C)(C)C)C(N5[C@H](C(N[C@@H](C)C6=CC=C(C7=C(C)N=CS7)C=C6)=O)C[C@@H](O)C5)=O)=O)CC8CCC8)C=C4)=O)=C1	OC1=CC=C2C(SC(C3=CC=C(O)C=C3)=C2C(C4=CC=C(OCCN(CCCCCCCC(N[C@@H](C(C)(C)C)C(N5[C@H](C(N[C@@H](C)C6=CC=C(C7=C(C)N=CS7)C=C6)=O)C[C@@H](O)C5)=O)=O)CC8CCC8)C=C4)=O)=C1	SW 29	https://pubs.acs.org/doi/abs/10.1021/acs.jmedchem.8b01572	Uni Michigan	VHL	VH032	ER	1042.36	8.83	5	10	27	181.1	2	6	7.58	37.58	8	alkyl	4	5.66667
OC1=CC=C2C(SC(C3=CC=C(O)C=C3)=C2C(C4=CC=C(OCCN(CCCCCCCC(N[C@@H](C(C)(C)C)C(N5[C@H](C(N[C@@H](C)C6=CC=C(C7=C(C)N=CS7)C=C6)=O)C[C@@H](O)C5)=O)=O)C8CCCCC8)C=C4)=O)=C1	OC1=CC=C2C(SC(C3=CC=C(O)C=C3)=C2C(C4=CC=C(OCCN(CCCCCCCC(N[C@@H](C(C)(C)C)C(N5[C@H](C(N[C@@H](C)C6=CC=C(C7=C(C)N=CS7)C=C6)=O)C[C@@H](O)C5)=O)=O)C8CCCCC8)C=C4)=O)=C1	SW 28	https://pubs.acs.org/doi/abs/10.1021/acs.jmedchem.8b01572	Uni Michigan	VHL	VH032	ER	1056.39	8.81	5	10	26	181.1	2	6	7.88	36.88	8	alkyl	4	5.66667
OC1=CC=C2C(SC(C3=CC=C(O)C=C3)=C2C(C4=CC=C(OCCN(CCCCCCCCCC(N[C@@H](C(C)(C)C)C(N5[C@H](C(N[C@@H](C)C6=CC=C(C7=C(C)N=CS7)C=C6)=O)C[C@@H](O)C5)=O)=O)CC)C=C4)=O)=C1	OC1=CC=C2C(SC(C3=CC=C(O)C=C3)=C2C(C4=CC=C(OCCN(CCCCCCCCCC(N[C@@H](C(C)(C)C)C(N5[C@H](C(N[C@@H](C)C6=CC=C(C7=C(C)N=CS7)C=C6)=O)C[C@@H](O)C5)=O)=O)CC)C=C4)=O)=C1	SW 21	https://pubs.acs.org/doi/abs/10.1021/acs.jmedchem.8b01572	Uni Michigan	VHL	VH032	ER	1030.35	8.82	5	10	28	181.1	2	6	8.09	39.09	10	alkyl	4	5.66667
CC(C=C(NC1=NC(NC2=C(S(=O)(C(C)C)=O)C=CC=C2)=C(Cl)C=N1)C(OC(C)C)=C3)=C3C(CC4)CCN4C(CCCCCC(NC(C(C)(C)C)C(N5C(C(NCC6=CC=C(C7=C(C)N=CS7)C=C6)=O)CC(C)C5)=O)=O)=O	CC(C=C(NC1=NC(NC2=C(S(=O)(C(C)C)=O)C=CC=C2)=C(Cl)C=N1)C(OC(C)C)=C3)=C3C(CC4)CCN4C(CCCCCC(NC(C(C)(C)C)C(N5C(C(NCC6=CC=C(C7=C(C)N=CS7)C=C6)=O)CC(C)C5)=O)=O)=O	TD 016	https://www.ncbi.nlm.nih.gov/pubmed/30274780	Korea Research Institute of Chemical Technology	VHL	VH032	ALK	1110.87	8.99	4	12	26	203.33	2	5	9.13	37.13	7	Alkyl	5	5.66667
CC1=C(C2=CC=C(CNC([C@@H]3[C@@]([H])(F)[C@@H](O)CN3C([C@H](C(C)(C)C)NC(COCCOCCOCCNC(C[C@H]4C5=NN=C(C)N5C6=C(C(C7=CC=C(Cl)C=C7)=N4)C(C)=C(C)S6)=O)=O)=O)=O)C=C2)SC=N1	CC1=C(C2=CC=C(CNC([C@@H]3[C@@]([H])(F)[C@@H](O)CN3C([C@H](C(C)(C)C)NC(COCCOCCOCCNC(C[C@H]4C5=NN=C(C)N5C6=C(C(C7=CC=C(Cl)C=C7)=N4)C(C)=C(C)S6)=O)=O)=O)=O)C=C2)SC=N1	15a	https://www.ncbi.nlm.nih.gov/pubmed/?term=3%E2%80%91Fluoro-4-hydroxyprolines%3A+Synthesis%2C+Conformational+Analysis%2C+and+Stereoselective+Recognition+by+the+VHL+E3+Ubiq	University of Dundee	VHL	VH032	BET	1020.63	5.16	4	14	25	208.21	3	5	1.93	31.07	12	PEG2	4	5.6
CN(CCCNC1=NC(NC2=CC=C(OCCCOCCCCOCCCOCC(=O)N[C@H](C(=O)N3C[C@H](O)C[C@H]3C(=O)NCC3=CC=C(C=C3)C3=C(C)N=CS3)C(C)(C)C)C=C2)=NC=C1Br)C(=O)C1CCC1	CN(CCCNC1=NC(NC2=CC=C(OCCCOCCCCOCCCOCC(=O)N[C@H](C(=O)N3C[C@H](O)C[C@H]3C(=O)NCC3=CC=C(C=C3)C3=C(C)N=CS3)C(C)(C)C)C=C2)=NC=C1Br)C(=O)C1CCC1	3i	https://www.ncbi.nlm.nih.gov/pubmed/28692295	Yale University	VHL	VH032	TBK1	1093.19	6.12	5	14	35	217.11	2	4	4.3	40.3	16	PEG4 PEG3	5	5.6
O=C1NC(CCC1N2C(C(C(NCCOCCOCCNC3=CC=CC(C4=O)=C3C(N4C5C(NC(CC5)=O)=O)=O)=CC=C6)=C6C2=O)=O)=O	O=C1NC(CCC1N2C(C(C(NCCOCCOCCNC3=CC=CC(C4=O)=C3C(N4C5C(NC(CC5)=O)=O)=O)=CC=C6)=C6C2=O)=O)=O	15a	https://www.ncbi.nlm.nih.gov/pubmed/30118587	University of Bonn	CRBN	Pomalidomide	CRBN	660.64	0.6	4	12	13	209.62	0	2	0.01	31.07	8	PEG2	4	5.5
CC(C)(C1=CN=C(O1)CSC2=CN=C(S2)NC(C3CCN(CC3)CC(NCCOCCOCCOCCNC4=C5C(N(C(C5=CC=C4)=O)C6CCC(NC6=O)=O)=O)=O)=O)C	CC(C)(C1=CN=C(O1)CSC2=CN=C(S2)NC(C3CCN(CC3)CC(NCCOCCOCCOCCNC4=C5C(N(C(C5=CC=C4)=O)C6CCC(NC6=O)=O)=O)=O)=O)C	THAL SNS 032	https://www.ncbi.nlm.nih.gov/pubmed/29251720	Dana-Farber Cancer Institute	CRBN	Pomalidomide	CDK9	869.022	2.64	4	14	24	218.66	2	3	1.24	28.76	12	PEG2	4	5.5
ClC1=CC=C(C2=N[C@H](C3=NN=C(N3C4=C2C(C)=C(S4)C)C)CC(NCCOCCOCCOCCOCC(N[C@H](C(N5[C@@H](CC(C5)O)C(NCC6=CC=C(C=C6)C7=C(N=CS7)C)=O)=O)C(C)(C)C)=O)=O)C=C1	ClC1=CC=C(C2=N[C@H](C3=NN=C(N3C4=C2C(C)=C(S4)C)C)CC(NCCOCCOCCOCCOCC(N[C@H](C(N5[C@@H](CC(C5)O)C(NCC6=CC=C(C=C6)C7=C(N=CS7)C)=O)=O)C(C)(C)C)=O)=O)C=C1	MZ2	https://www.ncbi.nlm.nih.gov/pubmed/26035625	University of Dundee	VHL	VH032	BET	1046.7	5.12	4	14	28	217.44	3	5	1.59	34.41	15	PEG2	4	5.5
O=C(N1C2C(NC(CC2)=O)=O)C3=CC=CC(NCCCN4C=C(C#CC5=C(CC6=CC=CC=C6)C(COCC7=NN=C(C)N78)=C8S5)C=N4)=C3C1=O	O=C(N1C2C(NC(CC2)=O)=O)C3=CC=CC(NCCCN4C=C(C#CC5=C(CC6=CC=CC=C6)C(COCC7=NN=C(C)N78)=C8S5)C=N4)=C3C1=O	29	https://pubs.acs.org/doi/10.1021/acs.jmedchem.8b00506	University of Michigan	CRBN	Pomalidomide	BET	700.774	3.6	2	11	10	148.37	0	5	1.79	16.21	4	Alkyl	3	5.5
COC(C=C(C(C1=C2C=NC=C1)=CN(C)C2=O)C(OC)=C3)=C3CN4CCN(CCOCCOC5=CC(C6=C(C)N=CS6)=CC=C5CNC([C@@H]7C[C@@H](O)CN7C([C@H](C(C)(C)C)NC(C8(F)CC8)=O)=O)=O)CC4	COC(C=C(C(C1=C2C=NC=C1)=CN(C)C2=O)C(OC)=C3)=C3CN4CCN(CCOCCOC5=CC(C6=C(C)N=CS6)=CC=C5CNC([C@@H]7C[C@@H](O)CN7C([C@H](C(C)(C)C)NC(C8(F)CC8)=O)=O)=O)CC4	VZ 47	https://www.ncbi.nlm.nih.gov/pubmed/30540463	University of Dundee	VHL	VH101	BRD9	997.197	4.25	3	14	23	187.17	2	4	1.81	28.19	8	PEG2	4	5.5
COC1=CC(C(C2=C3C=NC=C2)=CN(C)C3=O)=CC(OC)=C1CN4CCN(CCOCCOC5=CC(C6=C(C)N=CS6)=CC=C5CNC([C@@H]7C[C@@H](O)CN7C([C@H](C(C)(C)C)NC(C8(F)CC8)=O)=O)=O)CC4	COC1=CC(C(C2=C3C=NC=C2)=CN(C)C3=O)=CC(OC)=C1CN4CCN(CCOCCOC5=CC(C6=C(C)N=CS6)=CC=C5CNC([C@@H]7C[C@@H](O)CN7C([C@H](C(C)(C)C)NC(C8(F)CC8)=O)=O)=O)CC4	VZ 46	https://www.ncbi.nlm.nih.gov/pubmed/30540463	University of Dundee	VHL	VH101	BRD9	997.197	4.35	3	14	23	187.17	2	4	1.86	28.14	8	PEG2	4	5.5
CC1=C(SC=N1)C2=CC=C(CNC([C@@H]3C[C@@H](O)CN3C([C@H](C(C)(C)C)NC(C4(F)CC4)=O)=O)=O)C(OCCCCC(NC5CN(CC6=C(OC)C=C(C(C7=C8C=NC=C7)=CN(C)C8=O)C(OC)=C6)C5)=O)=C2	CC1=C(SC=N1)C2=CC=C(CNC([C@@H]3C[C@@H](O)CN3C([C@H](C(C)(C)C)NC(C4(F)CC4)=O)=O)=O)C(OCCCCC(NC5CN(CC6=C(OC)C=C(C(C7=C8C=NC=C7)=CN(C)C8=O)C(OC)=C6)C5)=O)=C2	VZ 62	https://www.ncbi.nlm.nih.gov/pubmed/30540463	University of Dundee	VHL	VH!	BRD9	995.181	4.77	4	13	24	203.8	3	4	2.24	28.76	8	Alkyl	4	5.5
ClC1=CC=C(C2=N[C@H](C3=NN=C(N3C4=C2C(C)=C(S4)C)C)CC(NCCOCCOCCOCC(N[C@@H](CC5=CC=CC=C5)C(N[C@@H](C(C)(C)C)C(N6[C@@H](CC(C6)O)C(NCC7=CC=C(C=C7)C8=C(N=CS8)C)=O)=O)=O)=O)=O)C=C1	ClC1=CC=C(C2=N[C@H](C3=NN=C(N3C4=C2C(C)=C(S4)C)C)CC(NCCOCCOCCOCC(N[C@@H](CC5=CC=CC=C5)C(N[C@@H](C(C)(C)C)C(N6[C@@H](CC(C6)O)C(NCC7=CC=C(C=C7)C8=C(N=CS8)C)=O)=O)=O)=O)=O)C=C1	MZ3	https://www.ncbi.nlm.nih.gov/pubmed/26035625	University of Dundee	VHL	VH032	BET	1149.82	6.03	5	14	30	237.31	4	6	2.9	36.1	12	PEG2	5	5.5
ClC1=CC=C(C2=N[C@](CC(NCCOCCOCC(N[C@@H](C(C)(C)C)C(N3C[C@@H](O)C[C@@H]3C(NCC4=CC=C(C5=C(C)N=CS5)C=C4)=O)=O)=O)=O)([H])C6=NN=C(C)N6C7=C2C(C)=C(C)S7)C=C1	ClC1=CC=C(C2=N[C@](CC(NCCOCCOCC(N[C@@H](C(C)(C)C)C(N3C[C@@H](O)C[C@@H]3C(NCC4=CC=C(C5=C(C)N=CS5)C=C4)=O)=O)=O)=O)([H])C6=NN=C(C)N6C7=C2C(C)=C(C)S7)C=C1	MZ4	https://www.ncbi.nlm.nih.gov/pmc/articles/PMC5788402/	University of Dundee	VHL	VH032	BET	958.591	4.82	4	12	22	198.98	3	5	1.92	28.08	9	PEG2	4	5.4
CC1=C(C2=CC=C(CNC([C@@H]3C[C@@H](C)CN3C([C@@H](NC(COCCOCCOCCOCCOCCOCC(N[C@@H](C(C)(C)C)C(N4C[C@H](C)C[C@H]4C(NCC(C=C5)=CC=C5C(SC=N6)=C6C)=O)=O)=O)=O)C(C)(C)C)=O)=O)C=C2)SC=N1	CC1=C(C2=CC=C(CNC([C@@H]3C[C@@H](C)CN3C([C@@H](NC(COCCOCCOCCOCCOCCOCC(N[C@@H](C(C)(C)C)C(N4C[C@H](C)C[C@H]4C(NCC(C=C5)=CC=C5C(SC=N6)=C6C)=O)=O)=O)=O)C(C)(C)C)=O)=O)C=C2)SC=N1	CM11	https://www.ncbi.nlm.nih.gov/pubmed/29018234	University of Dundee	VHL	VH032	VHL	1175.51	5.82	4	14	39	237.12	4	4	3.66	43.66	20	PEG2	4	5.4
CC([C@@H](C(N1C[C@H](C[C@@H]1C(NCC2=CC=C(C=C2)C3=C(N=CS3)C)=O)O)=O)NC(COCCOCCOCCOCCNC(C4=CC=C(C5=CC6=C(N([C@H](C[C@H]6NC7=CC=C(Cl)C=C7)C)C(C)=O)C=C5)C=C4)=O)=O)(C)C	CC([C@@H](C(N1C[C@H](C[C@@H]1C(NCC2=CC=C(C=C2)C3=C(N=CS3)C)=O)O)=O)NC(COCCOCCOCCOCCNC(C4=CC=C(C5=CC6=C(N([C@H](C[C@H]6NC7=CC=C(Cl)C=C7)C)C(C)=O)C=C5)C=C4)=O)=O)(C)C	MZP-55	https://www.ncbi.nlm.nih.gov/pmc/articles/PMC5788402/	University of Dundee	VHL	VH032	BET	1080.74	5.83	5	12	30	209.46	3	5	4.15	36.15	15	PEG2	5	5.4
FC1=C([C@@]2(C#N)[C@H](CC(C)(C)C)N[C@@H](C(NC3=CC=C(C(NCCOCCOCCOCCNC(C4C5=NN=C(C)N5C(SC(C)=C6C)=C6C(C7=CC=C(Cl)C=C7)=N4)=O)=O)C=C3CC)=O)[C@@H]2C8=CC=CC(Cl)=C8F)C=CC(Cl)=C1	FC1=C([C@@]2(C#N)[C@H](CC(C)(C)C)N[C@@H](C(NC3=CC=C(C(NCCOCCOCCOCCNC(C4C5=NN=C(C)N5C(SC(C)=C6C)=C6C(C7=CC=C(Cl)C=C7)=N4)=O)=O)C=C3CC)=O)[C@@H]2C8=CC=CC(Cl)=C8F)C=CC(Cl)=C1	A 1874	https://www.ncbi.nlm.nih.gov/pubmed/30385614	Yale University	MDM2	Idasanutlin	BET	1157.6	6.41	4	14	26	191.13	3	6	8.25	37.25	13	PEG2	5	5.4
O=C(COCCCCOC1=CC=C(C2=CC=C(N3C(N(C4=CC(C(F)(F)F)=C(C#N)C=C4)C(C3(C)C)=O)=S)C=C2)C=C1)N[C@H](C(N5[C@H](C(NCC6=CC=C(C7=C(C)N=CS7)C=C6)=O)C[C@@H](O)C5)=O)C(C)(C)C	O=C(COCCCCOC1=CC=C(C2=CC=C(N3C(N(C4=CC(C(F)(F)F)=C(C#N)C=C4)C(C3(C)C)=O)=S)C=C2)C=C1)N[C@H](C(N5[C@H](C(NCC6=CC=C(C7=C(C)N=CS7)C=C6)=O)C[C@@H](O)C5)=O)C(C)(C)C	ARCC-4	https://www.ncbi.nlm.nih.gov/pubmed/30271980/	Yale University	VHL	VH032	AR	1024.19	7.34	3	12	23	176.9	2	5	7.33	32.33	12	benzyl alkyl ether	5	5.33333
O=C1CCC2=C1C(OC3=C(C(F)(F)F)C=NC(NC4=C(OC)C=C(C(NCCOCCOCCOCCC(NC5=C(C(N(C6CCC(NC6=O)=O)C7=O)=O)C7=CC=C5)=O)=O)C=C4)=N3)=CC=C2	O=C1CCC2=C1C(OC3=C(C(F)(F)F)C=NC(NC4=C(OC)C=C(C(NCCOCCOCCOCCC(NC5=C(C(N(C6CCC(NC6=O)=O)C7=O)=O)C7=CC=C5)=O)=O)C=C4)=N3)=CC=C2	BI 3663	https://www.ncbi.nlm.nih.gov/pubmed/30739444	Boehringer / Dundee	CRBN	Pomalidomide	PTK2	917.852	3.6	4	18	23	241.72	2	4	3.62	27.62	13	PEG2	4	5.25
CC(C)S(C1=CC=CC=C1NC2=NC(NC3=CC(C)=C(C4CCN(CCOCCOCCNC(CNC5=C(C(N(C6C(NC(CC6)=O)=O)C7=O)=O)C7=CC=C5)=O)CC4)C=C3OC(C)C)=NC=C2Cl)(=O)=O	CC(C)S(C1=CC=CC=C1NC2=NC(NC3=CC(C)=C(C4CCN(CCOCCOCCNC(CNC5=C(C(N(C6C(NC(CC6)=O)=O)C7=O)=O)C7=CC=C5)=O)CC4)C=C3OC(C)C)=NC=C2Cl)(=O)=O	TL13-112	https://www.ncbi.nlm.nih.gov/pubmed/29660984	Dana-Farber Cancer Institute	CRBN	Pomalidomide	ALK	1002.58	4.88	5	16	23	238.53	1	4	3.78	27.78	12	PEG2	4	5.25
O=C(C[C@H]1C2=NN=C(C)N2C3=C(C(C)=C(C)S3)C(C4=CC=C(Cl)C=C4)=N1)NC5=CC=CC(OCCOCCOCCNC6=C7C(N=NN(C(CC8)C(NC8=O)=O)C7=O)=CC=C6)=C5	O=C(C[C@H]1C2=NN=C(C)N2C3=C(C(C)=C(C)S3)C(C4=CC=C(Cl)C=C4)=N1)NC5=CC=CC(OCCOCCOCCNC6=C7C(N=NN(C(CC8)C(NC8=O)=O)C7=O)=CC=C6)=C5	TD-428	https://www.ncbi.nlm.nih.gov/pubmed/30684871/	Uni Science and Technology, Korea	CRBN	aminobenzotriazino glutarimide (TD)	BRD4	879.39	4.75	3	14	17	200.34	1	5	4.83	23.83	13	PEG3	4	5.25
O=C(C[C@H]1C2=NN=C(C)N2C3=C(C(C)=C(C)S3)C(C4=CC=C(Cl)C=C4)=N1)NC5=CC=C(OCCOCCOCCNC6=C7C(N=NN(C(CC8)C(NC8=O)=O)C7=O)=CC=C6)C=C5	O=C(C[C@H]1C2=NN=C(C)N2C3=C(C(C)=C(C)S3)C(C4=CC=C(Cl)C=C4)=N1)NC5=CC=C(OCCOCCOCCNC6=C7C(N=NN(C(CC8)C(NC8=O)=O)C7=O)=CC=C6)C=C5	TD-188	https://www.ncbi.nlm.nih.gov/pubmed/30684871/	Uni Science and Technology, Korea	CRBN	aminobenzotriazino glutarimide (TD)	BRD4	879.39	4.85	3	14	17	200.34	1	5	4.84	23.84	14	PEG2	4	5.25
O=C1C2=C(C(N1C3CCC(NC3=O)=O)=O)C=C(NC(COCCOCCN4CCC(N5C(N=CN=C6N)=C6C(C7=CC=C(OC8=CC=CC=C8)C=C7)=N5)CC4)=O)C=C2	O=C1C2=C(C(N1C3CCC(NC3=O)=O)=O)C=C(NC(COCCOCCN4CCC(N5C(N=CN=C6N)=C6C(C7=CC=C(OC8=CC=CC=C8)C=C7)=N5)CC4)=O)C=C2	MT-802	https://www.ncbi.nlm.nih.gov/pubmed/29851337	Yale University	CRBN	Pomalidomide	BTK	787.834	2.54	3	14	15	209.92	1	5	0.45	22.55	9	PEG2	4	5.2
CC1=C(SC=N1)C2=CC=C(C=C2)CNC([C@@H]3[C@@]([H])([C@H](CN3C([C@@H](NC(COCCOCCOCCNC(C[C@H]4C5=NN=C(N5C6=C(C(C)=C(S6)C)C(C7=CC=C(C=C7)Cl)=N4)C)=O)=O)C(C)(C)C)=O)O)F)=O	CC1=C(SC=N1)C2=CC=C(C=C2)CNC([C@@H]3[C@@]([H])([C@H](CN3C([C@@H](NC(COCCOCCOCCNC(C[C@H]4C5=NN=C(N5C6=C(C(C)=C(S6)C)C(C7=CC=C(C=C7)Cl)=N4)C)=O)=O)C(C)(C)C)=O)O)F)=O	15b	https://www.ncbi.nlm.nih.gov/pubmed/?term=3%E2%80%91Fluoro-4-hydroxyprolines%3A+Synthesis%2C+Conformational+Analysis%2C+and+Stereoselective+Recognition+by+the+VHL+E3+Ubiq	University of Dundee	VHL	VH032	BET	1020.63	5.15	4	14	25	208.21	3	5	1.93	31.07	12	PEG2	4	5.2
O=C1CCC(N2C(C(C=CC=C3OCCNC(CCOCCCOCCCOC4=C(OC)C=C(C(OC5=CC=C(NC(C6(CC6)C(NC7=CC=C(F)C=C7)=O)=O)C=C5F)=CC=N8)C8=C4)=O)=C3C2=O)=O)C(N1)=O	O=C1CCC(N2C(C(C=CC=C3OCCNC(CCOCCCOCCCOC4=C(OC)C=C(C(OC5=CC=C(NC(C6(CC6)C(NC7=CC=C(F)C=C7)=O)=O)C=C5F)=CC=N8)C8=C4)=O)=C3C2=O)=O)C(N1)=O	Compound 2	https://www.ncbi.nlm.nih.gov/pubmed/29129718	Yale University	CRBN	Thalidomide	Multi-kinase	992.987	4.95	4	16	27	238.59	3	5	3.63	32.63	16	PEG2	4	5.2
CC1=C(SC=N1)C2=CC=C(CNC([C@@H]3C[C@@H](O)CN3C([C@@H](NC(CCCCOCCCCCOCCCCCCNC4=CC=CC(C(N5C6CCC(NC6=O)=O)=O)=C4C5=O)=O)C(C)(C)C)=O)=O)C=C2	CC1=C(SC=N1)C2=CC=C(CNC([C@@H]3C[C@@H](O)CN3C([C@@H](NC(CCCCOCCCCCOCCCCCCNC4=CC=CC(C(N5C6CCC(NC6=O)=O)=O)=C4C5=O)=O)C(C)(C)C)=O)=O)C=C2	CRBN-6-5-5-VHL	https://www.ncbi.nlm.nih.gov/pubmed/30672516	Uni Bonn	VHL	VH032	CRBN	972.212	5.09	5	12	30	225.14	2	3	3.87	33.87	18	PEG5 PEG6	4	5.2
CC(C)(C)[C@@H](C(N1[C@H](C(NCC2=CC=C(C3=C(C)N=CS3)C=C2)=O)C[C@@H](O)C1)=O)NC(CCOCCOCCCCCOC4=CC(C(NC5=CC(Cl)=C(F)C=C5)=NC=N6)=C6C=C4OC)=O	CC(C)(C)[C@@H](C(N1[C@H](C(NCC2=CC=C(C3=C(C)N=CS3)C=C2)=O)C[C@@H](O)C1)=O)NC(CCOCCOCCCCCOC4=CC(C(NC5=CC(Cl)=C(F)C=C5)=NC=N6)=C6C=C4OC)=O	GB RTK 3	https://www.ncbi.nlm.nih.gov/pubmed/29129716	Yale University	VHL	VH032	Mutant EGFR	934.522	6.38	4	13	26	184.77	2	5	5.43	33.43	12	PEG2 PEG5	5	5.2
CN1C=C(C2=CC(OC)=C(OCC(N3CCC(C4CCN(C(COC5=CC=CC(C(N6C7C(NC(CC7)=O)=O)=O)=C5C6=O)=O)CC4)CC3)=O)C=C2)C(SC(C(NC8CCS(CC8)(=O)=O)=N)=C9)=C9C1=O	CN1C=C(C2=CC(OC)=C(OCC(N3CCC(C4CCN(C(COC5=CC=CC(C(N6C7C(NC(CC7)=O)=O)=O)=C5C6=O)=O)CC4)CC3)=O)C=C2)C(SC(C(NC8CCS(CC8)(=O)=O)=N)=C9)=C9C1=O	Remillard S2	https://www.ncbi.nlm.nih.gov/pubmed/28418626	Dana-Farber Cancer Institute	CRBN	Thalidomide	BRD9	984.109	2.97	3	14	15	242.19	0	3	-0.82	21.82	8	Piperazine	4	5
O=C(NCCNC1=CC=CC(C(N2C3CCC(NC3=O)=O)=O)=C1C2=O)COCCOCCN(CC4)CCN4CC5=C(OC)C=C(C(C6=C7C=NC=C6)=CN(C)C7=O)C=C5OC	O=C(NCCNC1=CC=CC(C(N2C3CCC(NC3=O)=O)=O)=C1C2=O)COCCOCCN(CC4)CCN4CC5=C(OC)C=C(C(C6=C7C=NC=C6)=CN(C)C7=O)C=C5OC	VZ 7	https://www.ncbi.nlm.nih.gov/pubmed/30540463	University of Dundee	CRBN	Pomalidomide	BRD9	838.919	1.57	3	14	19	200.75	1	3	-0.43	25.43	14	PEG2	4	5
CN1C=C(C2=CC(OC)=C(CN(C)CC(NCCOCCOCCNC3=CC=CC4=C3C(N(C5C(NC(CC5)=O)=O)C4=O)=O)=O)C(OC)=C2)C(C=CN=C6)=C6C1=O	CN1C=C(C2=CC(OC)=C(CN(C)CC(NCCOCCOCCNC3=CC=CC4=C3C(N(C5C(NC(CC5)=O)=O)C4=O)=O)=O)C(OC)=C2)C(C=CN=C6)=C6C1=O	dBRD9	https://www.ncbi.nlm.nih.gov/pubmed/28418626	Dana-Farber Cancer Institute	CRBN	Pomalidomide	BRD9	783.839	1.77	3	13	19	197.51	1	3	0.15	24.85	11	PEG2	4	5
CN1C=C(C2=CC(OC)=C(OCC(NCCCCCCCCNC3=CC=CC4=C3CN(C5C(NC(CC5)=O)=O)C4=O)=O)C=C2)C(SC(C(NC6CCS(CC6)(=O)=O)=N)=C7)=C7C1=O	CN1C=C(C2=CC(OC)=C(OCC(NCCCCCCCCNC3=CC=CC4=C3CN(C5C(NC(CC5)=O)=O)C4=O)=O)C=C2)C(SC(C(NC6CCS(CC6)(=O)=O)=N)=C7)=C7C1=O	Remillard 5	https://www.ncbi.nlm.nih.gov/pubmed/28418626	Dana-Farber Cancer Institute	CRBN	Lenalidomide	BRD9	888.068	4.18	5	12	20	216.4	1	3	0.84	25.16	9	Alkyl	4	5
CC1=C(SC=N1)C2=CC=C(CNC([C@@H]3C[C@@H](O)CN3C([C@H](C(C)(C)C)NC(C4(F)CC4)=O)=O)=O)C(OCCOCCOCCOCC(NC5CN(CC6=C(OC)C=C(C(C7=C8C=NC=C7)=CN(C)C8=O)C=C6OC)C5)=O)=C2	CC1=C(SC=N1)C2=CC=C(CNC([C@@H]3C[C@@H](O)CN3C([C@H](C(C)(C)C)NC(C4(F)CC4)=O)=O)=O)C(OCCOCCOCCOCC(NC5CN(CC6=C(OC)C=C(C(C7=C8C=NC=C7)=CN(C)C8=O)C=C6OC)C5)=O)=C2	VZ 59	https://www.ncbi.nlm.nih.gov/pubmed/30540463	University of Dundee	VHL	VH101	BRD9	1085.26	3.98	4	16	30	231.49	3	4	1.13	35.87	14	PEG2	4	5
CC1=C(SC=N1)C2=CC=C(CNC([C@@H]3C[C@@H](O)CN3C([C@H](C(C)(C)C)NC(C4(F)CC4)=O)=O)=O)C(OCCOCCOCC(NC5CN(CC6=C(OC)C=C(C(C7=C8C=NC=C7)=CN(C)C8=O)C=C6OC)C5)=O)=C2	CC1=C(SC=N1)C2=CC=C(CNC([C@@H]3C[C@@H](O)CN3C([C@H](C(C)(C)C)NC(C4(F)CC4)=O)=O)=O)C(OCCOCCOCC(NC5CN(CC6=C(OC)C=C(C(C7=C8C=NC=C7)=CN(C)C8=O)C=C6OC)C5)=O)=C2	VZ 57	https://www.ncbi.nlm.nih.gov/pubmed/30540463	University of Dundee	VHL	VH101	BRD9	1041.21	3.99	4	15	27	222.26	3	4	1.18	32.82	11	PEG2	4	5
CN1C=C(C2=CC(OC)=C(OCC(NCCCCCCCCNC3=CC=CC(C(N4C5C(NC(CC5)=O)=O)=O)=C3C4=O)=O)C=C2)C(SC(C(NC6CCS(CC6)(=O)=O)=N)=C7)=C7C1=O	CN1C=C(C2=CC(OC)=C(OCC(NCCCCCCCCNC3=CC=CC(C(N4C5C(NC(CC5)=O)=O)=O)=C3C4=O)=O)C=C2)C(SC(C(NC6CCS(CC6)(=O)=O)=N)=C7)=C7C1=O	Remillard 4	https://www.ncbi.nlm.nih.gov/pubmed/28418626	Dana-Farber Cancer Institute	CRBN	Pomalidomide	BRD9	902.051	4.11	5	13	20	233.47	1	3	1.38	24.62	9	Alkyl	4	5
NC1=NC=NC2=C1C(C(C=C3)=CC=C3OC4=CC=CC=C4)=NN2C5CCN(CCCCCCOCCOCC(NC6=C(C(N(C7C(NC(CC7)=O)=O)C8=O)=O)C8=CC=C6)=O)CC5	NC1=NC=NC2=C1C(C(C=C3)=CC=C3OC4=CC=CC=C4)=NN2C5CCN(CCCCCCOCCOCC(NC6=C(C(N(C7C(NC(CC7)=O)=O)C8=O)=O)C8=CC=C6)=O)CC5	MT-540	https://www.ncbi.nlm.nih.gov/pubmed/29851337	Yale University	CRBN	Pomalidomide	BTK	843.942	3.76	3	14	19	209.92	1	5	1.68	25.32	13	PEG4	4	5
CC1=C(SC=N1)C2=CC=C(CNC([C@@H]3C[C@@H](O)CN3C([C@H](C(C)(C)C)NC(C4(F)CC4)=O)=O)=O)C(OCCOCCCCC(NC5CN(CC6=C(OC)C=C(C(C7=C8C=NC=C7)=CN(C)C8=O)C=C6OC)C5)=O)=C2	CC1=C(SC=N1)C2=CC=C(CNC([C@@H]3C[C@@H](O)CN3C([C@H](C(C)(C)C)NC(C4(F)CC4)=O)=O)=O)C(OCCOCCCCC(NC5CN(CC6=C(OC)C=C(C(C7=C8C=NC=C7)=CN(C)C8=O)C=C6OC)C5)=O)=C2	VZ 63	https://www.ncbi.nlm.nih.gov/pubmed/30540463	University of Dundee	VHL	VH101	BRD9	1039.23	4.82	4	14	27	213.03	3	4	2.2	31.8	11	PEG-Alkyl	4	5
O=C(N1C2C(NC(CC2)=O)=O)C3=CC=CC(NCCCCN4C=C(C#CC5=C(CC6=CC=CC=C6)C(COCC7=NN=C(C)N78)=C8S5)C=N4)=C3C1=O	O=C(N1C2C(NC(CC2)=O)=O)C3=CC=CC(NCCCCN4C=C(C#CC5=C(CC6=CC=CC=C6)C(COCC7=NN=C(C)N78)=C8S5)C=N4)=C3C1=O	30	https://pubs.acs.org/doi/10.1021/acs.jmedchem.8b00506	University of Michigan	CRBN	Pomalidomide	BET	714.801	3.91	2	11	11	148.37	0	5	2.24	16.76	5	Alkyl	4	5
CC1=C(SC=N1)C2=CC=C(CNC([C@@H]3C[C@@H](O)CN3C([C@H](C(C)(C)C)NC(C4(F)CC4)=O)=O)=O)C(OCCCCC(NC5CN(CC6=C(OC)C=C(C(C7=C8C=NC=C7)=CN(C)C8=O)C=C6OC)C5)=O)=C2	CC1=C(SC=N1)C2=CC=C(CNC([C@@H]3C[C@@H](O)CN3C([C@H](C(C)(C)C)NC(C4(F)CC4)=O)=O)=O)C(OCCCCC(NC5CN(CC6=C(OC)C=C(C(C7=C8C=NC=C7)=CN(C)C8=O)C=C6OC)C5)=O)=C2	VZ 61	https://www.ncbi.nlm.nih.gov/pubmed/30540463	University of Dundee	VHL	VH101	BRD9	995.181	4.75	4	13	24	203.8	3	4	2.24	28.76	8	Alkyl	4	5
CN1C=C(C2=CC(OC)=C(CN(C)CC(NCCCCCCCCNC3=CC=CC4=C3C(N(C5C(NC(CC5)=O)=O)C4=O)=O)=O)C(OC)=C2)C(C=CN=C6)=C6C1=O	CN1C=C(C2=CC(OC)=C(CN(C)CC(NCCCCCCCCNC3=CC=CC4=C3C(N(C5C(NC(CC5)=O)=O)C4=O)=O)=O)C(OC)=C2)C(C=CN=C6)=C6C1=O	Remillard S7	https://www.ncbi.nlm.nih.gov/pubmed/28418626	Dana-Farber Cancer Institute	CRBN	Pomalidomide	BRD9	779.895	3.57	3	11	19	179.05	1	3	2.6	22.4	8	Alkyl	4	5
CN1C=C(C2=CC(OC)=C(CN(C)CC(NCCCCCCCCNC3=CC=CC4=C3C(N(C5C(NC(CC5)=O)=O)C4=O)=O)=O)C(OC)=C2)C(C=CN=C6)=C6C1=O	CN1C=C(C2=CC(OC)=C(CN(C)CC(NCCCCCCCCNC3=CC=CC4=C3C(N(C5C(NC(CC5)=O)=O)C4=O)=O)=O)C(OC)=C2)C(C=CN=C6)=C6C1=O	dBRD9-A	https://www.ncbi.nlm.nih.gov/pubmed/30431433	Dana-Farber Cancer Institute	CRBN	Pomalidomide	BRD9	779.895	3.57	3	11	19	179.05	1	3	2.6	22.4	8	Alkyl	4	5
O=C(N1C2C(NC(CC2)=O)=O)C3=CC=CC(NCCCCCN4C=C(C#CC5=C(CC6=CC=CC=C6)C(COCC7=NN=C(C)N78)=C8S5)C=N4)=C3C1=O	O=C(N1C2C(NC(CC2)=O)=O)C3=CC=CC(NCCCCCN4C=C(C#CC5=C(CC6=CC=CC=C6)C(COCC7=NN=C(C)N78)=C8S5)C=N4)=C3C1=O	31	https://pubs.acs.org/doi/10.1021/acs.jmedchem.8b00506	University of Michigan	CRBN	Pomalidomide	BET	728.828	4.24	2	11	12	148.37	0	5	2.63	17.37	6	Alkyl	4	5
O=C(NC1=O)CCC1N2C(C3=C(C=CC=C3C2=O)OCCOCCOCCN4CCN(CC4)CC5=NC6=C(C=C5)C=C(C(NC7=CC(NC(C8=CC9=C(C=C8)OCCO9)=O)=CC=C7Cl)=O)C=C6)=O	O=C(NC1=O)CCC1N2C(C3=C(C=CC=C3C2=O)OCCOCCOCCN4CCN(CC4)CC5=NC6=C(C=C5)C=C(C(NC7=CC(NC(C8=CC9=C(C=C8)OCCO9)=O)=CC=C7Cl)=O)C=C6)=O	CCT367766	https://www.ncbi.nlm.nih.gov/pubmed/?term=Demonstrating+In-Cell+Target+Engagement+Using+a+Pirin+Protein+Degradation+Probe+(CCT367766)	ICR	CRBN	Thalidomide	Pirin	946.411	3.72	3	14	19	206.74	2	5	2.81	24.19	15	PEG2 Piperazine	4	5
O=C(C1=CSC([C@H]2CCCN2C([C@H](NC([C@@H](C)NC)=O)C3CCCCC3)=O)=N1)C4=CC=CC(OCCOCCOCCOCCNC(C[C@H]5C6=NN=C(C)N6C(SC(C)=C7C)=C7C(C8=CC=C(Cl)C=C8)=N5)=O)=C4	O=C(C1=CSC([C@H]2CCCN2C([C@H](NC([C@@H](C)NC)=O)C3CCCCC3)=O)=N1)C4=CC=CC(OCCOCCOCCOCCNC(C[C@H]5C6=NN=C(C)N6C(SC(C)=C7C)=C7C(C8=CC=C(Cl)C=C8)=N5)=O)=C4	SNIPER(BRD4)-1	https://www.ncbi.nlm.nih.gov/pubmed/28154167	National Instutite of Health Sciences	IAP	LCL161	BRD4	1056.74	6.38	3	14	27	197.21	2	5	3.09	32.09	13	PEG2	5	5
ClC1=CC=C2C(NC([C@@]23C4(CCCCC4)N[C@@H](C(NC5=CC=C(C(NCCOCCOCCNC6=CC=CC(C7=O)=C6C(N7C8C(NC(CC8)=O)=O)=O)=O)C=C5)=O)[C@@H]3C9=CC=CC(Cl)=C9F)=O)=C1	ClC1=CC=C2C(NC([C@@]23C4(CCCCC4)N[C@@H](C(NC5=CC=C(C(NCCOCCOCCNC6=CC=CC(C7=O)=C6C(N7C8C(NC(CC8)=O)=O)=O)=O)C=C5)=O)[C@@H]3C9=CC=CC(Cl)=C9F)=O)=C1	YL 2	https://www.ncbi.nlm.nih.gov/pubmed/30525597/	Uni Michigan	CRBN	Pomalidomide	MDM2	968.861	4.69	6	12	17	213.37	2	4	3.76	21.76	9	PEG2	5	5
CC(C)[C@H](NC(=O)COCCCOCCCCOCCCOC1=CC=C(NC2=NC=C(Br)C(NCCCN(C)C(=O)C3CCC3)=N2)C=C1)C(=O)N1C[C@H](O)C[C@H]1C(=O)NCC1=CC=C(C=C1)C1=C(C)N=CS1	CC(C)[C@H](NC(=O)COCCCOCCCCOCCCOC1=CC=C(NC2=NC=C(Br)C(NCCCN(C)C(=O)C3CCC3)=N2)C=C1)C(=O)N1C[C@H](O)C[C@H]1C(=O)NCC1=CC=C(C=C1)C1=C(C)N=CS1	6e	https://www.ncbi.nlm.nih.gov/pubmed/28692295	Yale University	VHL	Based on VH032	TBK1	1079.17	5.86	5	14	35	217.11	2	4	3.92	39.92	16	PEG3	4	5
ClC1=CC(O[C@H]2C(C)(C)[C@H](NC(C3=CC=C(C#CC4CCN(C5CCN(C(C[C@H](NC([C@@H]6C[C@@H](O)CN6C([C@@H](NC(C7(C#N)CC7)=O)C(C)(C)C)=O)=O)C8=CC=C(C9=C(C)N=CS9)C=C8)=O)CC5)CC4)C=C3)=O)C2(C)C)=CC=C1C#N	ClC1=CC(O[C@H]2C(C)(C)[C@H](NC(C3=CC=C(C#CC4CCN(C5CCN(C(C[C@H](NC([C@@H]6C[C@@H](O)CN6C([C@@H](NC(C7(C#N)CC7)=O)C(C)(C)C)=O)=O)C8=CC=C(C9=C(C)N=CS9)C=C8)=O)CC5)CC4)C=C3)=O)C2(C)C)=CC=C1C#N	WS 35	https://www.ncbi.nlm.nih.gov/pubmed/?term=30629437	Uni Michigan	VHL	Based on VH032	AR	1136.85	7.07	4	11	24	220.56	3	4	4.12	29.12	10	alkyne piperidine piperidine	5	5
ClC1=CC(O[C@H]2C(C)(C)[C@H](NC(C3=CC=C(C#CC4CCN(C5CCN(C(C[C@H](NC([C@@H]6C[C@@H](O)CN6C([C@@H](NC(C7(F)CC7)=O)C(C)(C)C)=O)=O)C8=CC=C(C9=C(C)N=CS9)C=C8)=O)CC5)CC4)C=C3)=O)C2(C)C)=CC=C1C#N	ClC1=CC(O[C@H]2C(C)(C)[C@H](NC(C3=CC=C(C#CC4CCN(C5CCN(C(C[C@H](NC([C@@H]6C[C@@H](O)CN6C([C@@H](NC(C7(F)CC7)=O)C(C)(C)C)=O)=O)C8=CC=C(C9=C(C)N=CS9)C=C8)=O)CC5)CC4)C=C3)=O)C2(C)C)=CC=C1C#N	ARD-69	https://www.ncbi.nlm.nih.gov/pubmed/?term=30629437	Uni Michigan	VHL	Based on VH032	AR	1129.83	7.59	4	11	23	196.77	3	4	4.85	28.85	10	alkyne piperidine piperidine	5	5
ClC1=CC(O[C@H]2C(C)(C)[C@H](NC(C3=CC=C(C#CC4CCN(C5CCN(C(C[C@H](NC([C@@H]6C[C@@H](O)CN6C([C@@H](C7=CC(C)=NO7)C(C)C)=O)=O)C8=CC=C(C9=C(C)N=CS9)C=C8)=O)CC5)CC4)C=C3)=O)C2(C)C)=CC=C1C#N	ClC1=CC(O[C@H]2C(C)(C)[C@H](NC(C3=CC=C(C#CC4CCN(C5CCN(C(C[C@H](NC([C@@H]6C[C@@H](O)CN6C([C@@H](C7=CC(C)=NO7)C(C)C)=O)=O)C8=CC=C(C9=C(C)N=CS9)C=C8)=O)CC5)CC4)C=C3)=O)C2(C)C)=CC=C1C#N	WS 32	https://www.ncbi.nlm.nih.gov/pubmed/?term=30629437	Uni Michigan	VHL	Based on VH032	AR	1095.8	7.63	3	11	21	189.26	2	5	4.88	27.88	10	alkyne piperidine piperidine	5	5
O=C1N(C2C(NC(CC2)=O)=O)C(C3=C(NCCCCCNC(C4=CC=C(C=C4)NC([C@@H]([C@@H]5C6=CC=CC(Cl)=C6F)NC7(CCCCC7)[C@@]5(C8=CC=C(Cl)C=C8N9)C9=O)=O)=O)C=CC=C31)=O	O=C1N(C2C(NC(CC2)=O)=O)C(C3=C(NCCCCCNC(C4=CC=C(C=C4)NC([C@@H]([C@@H]5C6=CC=CC(Cl)=C6F)NC7(CCCCC7)[C@@]5(C8=CC=C(Cl)C=C8N9)C9=O)=O)=O)C=CC=C31)=O	YL 6	https://www.ncbi.nlm.nih.gov/pubmed/30525597/	Uni Michigan	CRBN	Pomalidomide	MDM2	922.836	5.54	6	10	14	194.91	2	4	4.88	19.88	6	alkyl	5	5
OC1=CC=C2C(SC(C3=CC=C(O)C=C3)=C2C(C4=CC=C(OCCN(CCOCCOCCOCCC(N[C@@H](C(C)(C)C)C(N5[C@H](C(N[C@@H](C)C6=CC=C(C7=C(C)N=CS7)C=C6)=O)C[C@@H](O)C5)=O)=O)CC)C=C4)=O)=C1	OC1=CC=C2C(SC(C3=CC=C(O)C=C3)=C2C(C4=CC=C(OCCN(CCOCCOCCOCCC(N[C@@H](C(C)(C)C)C(N5[C@H](C(N[C@@H](C)C6=CC=C(C7=C(C)N=CS7)C=C6)=O)C[C@@H](O)C5)=O)=O)CC)C=C4)=O)=C1	SW 14	https://pubs.acs.org/doi/abs/10.1021/acs.jmedchem.8b01572	Uni Michigan	VHL	VH032	ER	1064.32	6.74	5	13	30	208.79	2	6	5.78	38.78	12	PEG2	5	5
OC1=CC=C2C(SC(C3=CC=C(O)C=C3)=C2C(C4=CC=C(OCCN(CCOCCOCCC(N[C@@H](C(C)(C)C)C(N5[C@H](C(N[C@@H](C)C6=CC=C(C7=C(C)N=CS7)C=C6)=O)C[C@@H](O)C5)=O)=O)CC)C=C4)=O)=C1	OC1=CC=C2C(SC(C3=CC=C(O)C=C3)=C2C(C4=CC=C(OCCN(CCOCCOCCC(N[C@@H](C(C)(C)C)C(N5[C@H](C(N[C@@H](C)C6=CC=C(C7=C(C)N=CS7)C=C6)=O)C[C@@H](O)C5)=O)=O)CC)C=C4)=O)=C1	SW 30	https://pubs.acs.org/doi/abs/10.1021/acs.jmedchem.8b01572	Uni Michigan	VHL	VH032	ER	1020.27	6.56	5	12	27	199.56	2	6	5.82	35.82	9	Peg2	5	5
OC1=CC=C2C(SC(C3=CC=C(O)C=C3)=C2C(C4=CC=C(OCCN(CCCCCCC(N[C@@H](C(C)(C)C)C(N5[C@H](C(N[C@@H](C)C6=CC=C(C7=C(C)N=CS7)C=C6)=O)C[C@@H](O)C5)=O)=O)CC)C=C4)=O)=C1	OC1=CC=C2C(SC(C3=CC=C(O)C=C3)=C2C(C4=CC=C(OCCN(CCCCCCC(N[C@@H](C(C)(C)C)C(N5[C@H](C(N[C@@H](C)C6=CC=C(C7=C(C)N=CS7)C=C6)=O)C[C@@H](O)C5)=O)=O)CC)C=C4)=O)=C1	SW 19	https://pubs.acs.org/doi/abs/10.1021/acs.jmedchem.8b01572	Uni Michigan	VHL	VH032	ER	988.272	7.74	5	10	25	181.1	2	6	6.76	34.76	7	alkyl	4	5
OC1=CC=C2C(SC(C3=CC=C(O)C=C3)=C2C(C4=CC=C(OCCN(CC)CCCCCCCC(N[C@@H](C(C)(C)C)C(N5[C@H](C(N[C@@H](C)C6=CC=C(C#C)C=C6)=O)C[C@@H](O)C5)=O)=O)C=C4)=O)=C1	OC1=CC=C2C(SC(C3=CC=C(O)C=C3)=C2C(C4=CC=C(OCCN(CC)CCCCCCCC(N[C@@H](C(C)(C)C)C(N5[C@H](C(N[C@@H](C)C6=CC=C(C#C)C=C6)=O)C[C@@H](O)C5)=O)=O)C=C4)=O)=C1	SW 45	https://pubs.acs.org/doi/abs/10.1021/acs.jmedchem.8b01572	Uni Michigan	VHL	VH032	ER	929.186	7.53	5	9	26	168.74	2	5	6.92	34.92	8	alkyl	4	5
CN[C@H](C(N[C@@H](C1CCCCC1)C(N2CCC[C@H]2C3=NC(C(C4=CC=CC(OCCOCCOCCOCC(N(C)CCOC5=CC=C(/C(C6=CC=C(O)C=C6)=C(CC)\C7=CC=CC=C7)C=C5)=O)=C4)=O)=CS3)=O)=O)C	CN[C@H](C(N[C@@H](C1CCCCC1)C(N2CCC[C@H]2C3=NC(C(C4=CC=CC(OCCOCCOCCOCC(N(C)CCOC5=CC=C(/C(C6=CC=C(O)C=C6)=C(CC)\C7=CC=CC=C7)C=C5)=O)=C4)=O)=CS3)=O)=O)C	SNIPER(ER)-87	https://www.ncbi.nlm.nih.gov/pubmed/28154167	National Instutite of Health Sciences	IAP	LCL161	ERα	1044.32	7.16	3	12	31	177.56	1	5	7.08	40.08	12	PEG2	5	5
CCN(CCCCCCCC(N[C@@H](C(C)(C)C)C(N1[C@H](C(N[C@@H](C)C2=CC=C(C3=C(C)N=CS3)C=C2)=O)C[C@@H](O)C1)=O)=O)CCOC(C=C4)=CC=C4/C(C5=CC=C(O)C=C5)=C(CC)\C6=CC=CC=C6	CCN(CCCCCCCC(N[C@@H](C(C)(C)C)C(N1[C@H](C(N[C@@H](C)C2=CC=C(C3=C(C)N=CS3)C=C2)=O)C[C@@H](O)C1)=O)=O)CCOC(C=C4)=CC=C4/C(C5=CC=C(O)C=C5)=C(CC)\C6=CC=CC=C6	SW 38	https://pubs.acs.org/doi/abs/10.1021/acs.jmedchem.8b01572	Uni Michigan	VHL	VH032	ER	956.3	8.98	4	8	27	143.8	2	5	7.35	36.35	8	alkyl	4	5
OC1=CC=C2C(SC(C3=CC=C(O)C=C3)=C2C(C4=CC=C(OCCN(CCCCCCCC(N[C@@H](C(C)(C)C)C(N5[C@H](C(N[C@@H](C)C6=CC=C(C7=C(C)N=CS7)C=C6)=O)C[C@@H](O)C5)=O)=O)C8CCC8)C=C4)=O)=C1	OC1=CC=C2C(SC(C3=CC=C(O)C=C3)=C2C(C4=CC=C(OCCN(CCCCCCCC(N[C@@H](C(C)(C)C)C(N5[C@H](C(N[C@@H](C)C6=CC=C(C7=C(C)N=CS7)C=C6)=O)C[C@@H](O)C5)=O)=O)C8CCC8)C=C4)=O)=C1	SW 26	https://pubs.acs.org/doi/abs/10.1021/acs.jmedchem.8b01572	Uni Michigan	VHL	VH032	ER	1028.34	8.57	5	10	26	181.1	2	6	7.53	36.53	8	alkyl	4	5
OC1=CC=C2C(SC(C3=CC=C(O)C=C3)=C2C(C4=CC=C(OCCN(CCCCCCCCC(N[C@@H](C(C)(C)C)C(N5[C@H](C(N[C@@H](C)C6=CC=C(C7=C(C)N=CS7)C=C6)=O)C[C@@H](O)C5)=O)=O)CC)C=C4)=O)=C1	OC1=CC=C2C(SC(C3=CC=C(O)C=C3)=C2C(C4=CC=C(OCCN(CCCCCCCCC(N[C@@H](C(C)(C)C)C(N5[C@H](C(N[C@@H](C)C6=CC=C(C7=C(C)N=CS7)C=C6)=O)C[C@@H](O)C5)=O)=O)CC)C=C4)=O)=C1	SW 20	https://pubs.acs.org/doi/abs/10.1021/acs.jmedchem.8b01572	Uni Michigan	VHL	VH032	ER	1016.33	8.28	5	10	27	181.1	2	6	7.65	37.65	9	alkyl	4	5
CCN(CCCCCCCC(N[C@@H](C(C)(C)C)C(N1[C@H](C(N[C@@H](C)C2=CC=C(C3=C(C)N=CS3)C=C2)=O)C[C@@H](O)C1)=O)=O)CCOC(C=C4)=CC=C4/C(C5=CC=CC=C5)=C(CC)\C6=CC=CC=C6	CCN(CCCCCCCC(N[C@@H](C(C)(C)C)C(N1[C@H](C(N[C@@H](C)C2=CC=C(C3=C(C)N=CS3)C=C2)=O)C[C@@H](O)C1)=O)=O)CCOC(C=C4)=CC=C4/C(C5=CC=CC=C5)=C(CC)\C6=CC=CC=C6	SW 39	https://pubs.acs.org/doi/abs/10.1021/acs.jmedchem.8b01572	Uni Michigan	VHL	VH032	ER	940.301	8.98	3	7	27	123.57	2	5	7.66	36.66	8	alkyl	3	5
CC(C=C(NC1=NC(NC2=C(S(=O)(C(C)C)=O)C=CC=C2)=C(Cl)C=N1)C(OC(C)C)=C3)=C3C(CC4)CCN4C(CCCC(NC(C(C)(C)C)C(N5C(C(NCC6=CC=C(C7=C(C)N=CS7)C=C6)=O)CC(C)C5)=O)=O)=O	CC(C=C(NC1=NC(NC2=C(S(=O)(C(C)C)=O)C=CC=C2)=C(Cl)C=N1)C(OC(C)C)=C3)=C3C(CC4)CCN4C(CCCC(NC(C(C)(C)C)C(N5C(C(NCC6=CC=C(C7=C(C)N=CS7)C=C6)=O)CC(C)C5)=O)=O)=O	TD 004	https://www.ncbi.nlm.nih.gov/pubmed/30274779	Korea Research Institute of Chemical Technology	VHL	VH032	ALK	1082.82	8.24	4	12	24	203.33	2	5	8.24	34.24	5	Alkyl	5	5
O=C(N(CC1=CC=C(C(NO)=O)C=C1)CCCCC2=CN(CCOCCOCCNC3=C(C(N(C4C(NC(CC4)=O)=O)C5=O)=O)C5=CC=C3)N=N2)NC6=CC=CC=C6	O=C(N(CC1=CC=C(C(NO)=O)C=C1)CCCCC2=CN(CCOCCOCCNC3=C(C(N(C4C(NC(CC4)=O)=O)C5=O)=O)C5=CC=C3)N=N2)NC6=CC=CC=C6	NP8	https://link.springer.com/article/10.1007%2Fs13238-018-0602-z	Tsinghua University	CRBN	Pomalidomide	HDAC6	795.854	2.3	5	13	23	223.67	2	4	2.59	27.41	11	PEG2, triazole	4	5
O=C([C@H]1N(C([C@@H](NC(COCCOCCOCCNC(C2=CC=C(NC3=NC=C(C(F)(F)F)C(OC4=CC=CC(CC5)=C4C5=O)=N3)C(OC)=C2)=O)=O)C(C)(C)C)=O)C[C@H](O)C1)NCC6=CC=C(C7=C(C)N=CS7)C=C6	O=C([C@H]1N(C([C@@H](NC(COCCOCCOCCNC(C2=CC=C(NC3=NC=C(C(F)(F)F)C(OC4=CC=CC(CC5)=C4C5=O)=N3)C(OC)=C2)=O)=O)C(C)(C)C)=O)C[C@H](O)C1)NCC6=CC=C(C7=C(C)N=CS7)C=C6	BI-0319	https://www.ncbi.nlm.nih.gov/pubmed/30739444/	Uni Dundee	VHL	VH032	PTK2	1061.14	5.43	5	18	29	240.17	3	5	4.15	35.15	12	PEG2	4	5
O=C1NC(CCC1N2C(C(C=CC=C3NCCOCCOCCOCCOCCOCCNC(CN4CCC(C5=C(C)C=C(NC6=NC(NC7=C(S(=O)(C(C)C)=O)C=CC=C7)=C(Cl)C=N6)C(OC(C)C)=C5)CC4)=O)=C3C2=O)=O)=O	O=C1NC(CCC1N2C(C(C=CC=C3NCCOCCOCCOCCOCCOCCNC(CN4CCC(C5=C(C)C=C(NC6=NC(NC7=C(S(=O)(C(C)C)=O)C=CC=C7)=C(Cl)C=N6)C(OC(C)C)=C5)CC4)=O)=C3C2=O)=O)=O	MS4077	https://www.ncbi.nlm.nih.gov/pubmed/29627725	Icahn School of Medicine	CRBN	Pomalidomide	ALK	1134.74	5.29	5	19	32	266.22	1	4	4.65	37.65	20	PEG2	4	4.8
CC(C)(C)C1=CC(NC(NC2=CC=C(C3=CN4C(SC5=C4C=CC(OCCOCCOCCC(N[C@H](C(N6[C@H](C(NCC7=CC=C(C8=C(C)N=CS8)C=C7)=O)C[C@@H](O)C6)=O)C(C)(C)C)=O)=C5)=N3)C=C2)=O)=NO1	CC(C)(C)C1=CC(NC(NC2=CC=C(C3=CN4C(SC5=C4C=CC(OCCOCCOCCC(N[C@H](C(N6[C@H](C(NCC7=CC=C(C8=C(C)N=CS8)C=C7)=O)C[C@@H](O)C6)=O)C(C)(C)C)=O)=C5)=N3)C=C2)=O)=NO1	FLT-3 PROTAC	https://www.ncbi.nlm.nih.gov/m/pubmed/30427680/	Yale University	VHL	VH032	FLT-3	1020.23	6.16	5	13	26	217.11	2	7	5.8	35.8	9	PEG2	5	4.8
FC1=CC=CC(COC2=CC=C(NC3=NC=NC4=C3C=C(C5=CC=C(OCCOCCOCC(N[C@@H](C(C)(C)C)C(N6[C@H](C(NCC7=CC=C(C8=C(C)N=CS8)C=C7)=O)C[C@@H](O)C6)=O)=O)C=C5)C=C4)C=C2Cl)=C1	FC1=CC=CC(COC2=CC=C(NC3=NC=NC4=C3C=C(C5=CC=C(OCCOCCOCC(N[C@@H](C(C)(C)C)C(N6[C@H](C(NCC7=CC=C(C8=C(C)N=CS8)C=C7)=O)C[C@@H](O)C6)=O)=O)C=C5)C=C4)C=C2Cl)=C1	GB RTK 1	https://www.ncbi.nlm.nih.gov/pubmed/29129716	Yale University	VHL	VH032	EGFR and Her2	1030.61	7.61	4	13	25	184.77	2	7	7.54	36.54	8	PEG2	5	4.8
ClC1=CC=C(C=C1)C2=N[C@H](C3=NN=C(N3C4=C2C(C)=C(S4)C)C)CC(NCCCCCCSC(C)([C@H](NC(C)=O)C(N5[C@@H](C[C@H](C5)O)C(NCC6=CC=C(C=C6)C7=C(N=CS7)C)=O)=O)C)=O	ClC1=CC=C(C=C1)C2=N[C@H](C3=NN=C(N3C4=C2C(C)=C(S4)C)C)CC(NCCCCCCSC(C)([C@H](NC(C)=O)C(N5[C@@H](C[C@H](C5)O)C(NCC6=CC=C(C=C6)C7=C(N=CS7)C)=O)=O)C)=O	AT1	https://www.ncbi.nlm.nih.gov/pubmed/28288108	Univesity of Dundee	VHL	VH298 analog	BRD4	972.68	6.38	4	10	22	180.52	3	5	2.88	27.12	9	Thio alkyl	4	4.75
CC1=C(C2=CC=C(C=C2)CNC([C@@H]3C[C@H](CN3C([C@H](C(C)(C)C)NC(CCCCCOCCCCOCCCCOCCCCNC4=CC=CC(C(N5C6CCC(NC6=O)=O)=O)=C4C5=O)=O)=O)O)=O)SC=N1	CC1=C(C2=CC=C(C=C2)CNC([C@@H]3C[C@H](CN3C([C@H](C(C)(C)C)NC(CCCCCOCCCCOCCCCOCCCCNC4=CC=CC(C(N5C6CCC(NC6=O)=O)=O)=C4C5=O)=O)=O)O)=O)SC=N1	CRBN-4-4-6-VHL	https://www.ncbi.nlm.nih.gov/pubmed/30672516	Uni Bonn	VHL	VH032	CRBN	1016.27	5.12	5	13	33	234.37	2	3	3.52	36.52	21	PEG4 PEG5	4	4.75
O=C(CC1)NC(C1N2C(C(C(OCC(NCCCOCCOCCOCCCNC(CCC(NC3=CC=CC([C@H](CCC4=CC=C(OC)C(OC)=C4)CC(C5CCCCN5C(C(C(C)(C)CC)=O)=O)=O)=C3)=O)=O)=O)=CC=C6)=C6C2=O)=O)=O	O=C(CC1)NC(C1N2C(C(C(OCC(NCCCOCCOCCOCCCNC(CCC(NC3=CC=CC([C@H](CCC4=CC=C(OC)C(OC)=C4)CC(C5CCCCN5C(C(C(C)(C)CC)=O)=O)=O)=C3)=O)=O)=O)=CC=C6)=C6C2=O)=O)=O	dFKBP-2	http://science.sciencemag.org/content/348/6241/1376.full	Dana-Farber Cancer Institute	CRBN	Thalidomide	BRD4	1139.31	4.44	4	16	38	280.68	3	3	4.13	42.13	18	PEG2 alkyl	4	4.75
O=C(CC1)NC(C1N2C(C(C(OCC(NCCCCNC(CCC(NC3=CC=CC([C@H](CCC4=CC=C(OC)C(OC)=C4)CC(C5CCCCN5C(C(C(C)(C)CC)=O)=O)=O)=C3)=O)=O)=O)=CC=C6)=C6C2=O)=O)=O	O=C(CC1)NC(C1N2C(C(C(OCC(NCCCCNC(CCC(NC3=CC=CC([C@H](CCC4=CC=C(OC)C(OC)=C4)CC(C5CCCCN5C(C(C(C)(C)CC)=O)=O)=O)=C3)=O)=O)=O)=CC=C6)=C6C2=O)=O)=O	dFKBP-1	http://science.sciencemag.org/content/348/6241/1376.full	Dana-Farber Cancer Institute	CRBN	Thalidomide	BRD4	1007.15	4.25	4	13	29	252.99	3	3	4.73	33.73	9	Alkyl	4	4.75
CC1=C(C2=CC=C(C=C2)CNC([C@@H]3C[C@H](CN3C([C@H](C(C)(C)C)NC(CCCCCOCCCCCCOCCCCCCNC4=CC=CC(C(N5C6CCC(NC6=O)=O)=O)=C4C5=O)=O)=O)O)=O)SC=N1	CC1=C(C2=CC=C(C=C2)CNC([C@@H]3C[C@H](CN3C([C@H](C(C)(C)C)NC(CCCCCOCCCCCCOCCCCCCNC4=CC=CC(C(N5C6CCC(NC6=O)=O)=O)=C4C5=O)=O)=O)O)=O)SC=N1	CRBN-6-6-6-VHL	https://www.ncbi.nlm.nih.gov/pubmed/30672516	Uni Bonn	VHL	VH032	CRBN	1000.27	5.74	5	12	32	225.14	2	3	4.76	36.76	20	PEG6	4	4.75
CN[C@@H](C)C(=O)N[C@@H](C1CCCCC1)C(=O)N1CCC[C@H]1C1=NC(=CS1)C(=O)C1=CC=CC(OCCOCCOCCOCCOCCOC2=CC=C(CN3C(C)=C(C#N)C(=C3C)C3=CC=C(C=C3)C#N)C=C2)=C1	CN[C@@H](C)C(=O)N[C@@H](C1CCCCC1)C(=O)N1CCC[C@H]1C1=NC(=CS1)C(=O)C1=CC=CC(OCCOCCOCCOCCOCCOC2=CC=C(CN3C(C)=C(C#N)C(=C3C)C3=CC=C(C=C3)C#N)C=C2)=C1	SNIPER(AR)-171	https://www.ncbi.nlm.nih.gov/pubmed/28594553	National Instutite of Health Sciences	IAP	LCL161	AR	1028.28	6.73	2	14	32	197.07	1	5	6.49	40.49	15	PEG2	5	4.75
CN[C@@H](C)C(=O)N[C@@H](C1CCCCC1)C(=O)N1CCC[C@H]1C1=NC(=CS1)C(=O)C1=CC(OCCOCCOCCOCCOC2=CC=CC(CN3C(C)=C(C#N)C(=C3C)C3=CC=C(C=C3)C#N)=C2)=CC=C1	CN[C@@H](C)C(=O)N[C@@H](C1CCCCC1)C(=O)N1CCC[C@H]1C1=NC(=CS1)C(=O)C1=CC(OCCOCCOCCOCCOC2=CC=CC(CN3C(C)=C(C#N)C(=C3C)C3=CC=C(C=C3)C#N)=C2)=CC=C1	SNIPER(AR)-53	https://www.ncbi.nlm.nih.gov/pubmed/28594553	National Instutite of Health Sciences	IAP	LCL161	AR	984.226	6.47	2	13	29	187.84	1	5	6.54	37.54	12	PEG2	5	4.75
O=C1NC(CCC1N2C(C(C=CC=C3OCCOCCOCCCNC(CCC(N4CCN5C(COCCOC6=CC(NC7=NC5=NC=C7Cl)=CC(CC8)=C6N(C)C8=O)C4)=O)=O)=C3C2=O)=O)=O	O=C1NC(CCC1N2C(C(C=CC=C3OCCOCCOCCCNC(CCC(N4CCN5C(COCCOC6=CC(NC7=NC5=NC=C7Cl)=CC(CC8)=C6N(C)C8=O)C4)=O)=O)=C3C2=O)=O)=O	AZ 15	https://www.ncbi.nlm.nih.gov/pubmed/30335946	Astra Zeneca	CRBN	Thalidomide	BCL6	946.412	1.48	3	16	17	239.41	1	3	0.53	22.47	11	PEG2 PEG3	4	4.6
O=C1N(C(CC2)C(NC2=O)=O)C(C3=C1C=CC=C3NCCOCCOCCN4N=NC(OCCO[C@@H]([C@H](OC)C5)CC[C@H]5C[C@@H](C)[C@@H](OC([C@@H]6CCCCN6C(C([C@]7(O)O8)=O)=O)=O)CC([C@H](C)/C=C(C)\[C@@H](O)[C@@H](OC)C([C@H](C)C[C@H](C)/C=C\C=C/C=C(C)\[C@@H](OC)C[C@@H]8CC[C@H]7C)=O)=O)=C4)=O	O=C1N(C(CC2)C(NC2=O)=O)C(C3=C1C=CC=C3NCCOCCOCCN4N=NC(OCCO[C@@H]([C@H](OC)C5)CC[C@H]5C[C@@H](C)[C@@H](OC([C@@H]6CCCCN6C(C([C@]7(O)O8)=O)=O)=O)CC([C@H](C)/C=C(C)\[C@@H](O)[C@@H](OC)C([C@H](C)C[C@H](C)/C=C\C=C/C=C(C)\[C@@H](OC)C[C@@H]8CC[C@H]7C)=O)=O)=C4)=O	RC32	https://www.ncbi.nlm.nih.gov/pubmed/30729032	Tsinghua University	CRBN	Pomalidomide	FKBP12	1412.68	4.54	4	23	22	335.66	0	2		27	15	ether, triazole, PEG2	4	4.6
O=C1NC(CCC1N2C(C(C=CC=C3OCCOCCOCCOCCCNC(CCC(N4CCN5C(COCCOC6=CC(NC7=NC5=NC=C7Cl)=CC(CC8)=C6N(C)C8=O)C4)=O)=O)=C3C2=O)=O)=O	O=C1NC(CCC1N2C(C(C=CC=C3OCCOCCOCCOCCCNC(CCC(N4CCN5C(COCCOC6=CC(NC7=NC5=NC=C7Cl)=CC(CC8)=C6N(C)C8=O)C4)=O)=O)=C3C2=O)=O)=O	AZ 43	https://www.ncbi.nlm.nih.gov/pubmed/30335946	Astra Zeneca	CRBN	Thalidomide	BCL6	990.465	1.67	3	17	20	248.64	1	3	0.49	25.51	14	PEG2 PEG3	4	4.5
O=C1C2=C(C(NC(CCOCCCOCCCN3CCC(CC3)N4C5=C(C(C6=CC=C(C=C6)OC7=CC=CC=C7)=N4)C(N)=NC=N5)=O)=CC=C2)C(N1C8CCC(NC8=O)=O)=O	O=C1C2=C(C(NC(CCOCCCOCCCN3CCC(CC3)N4C5=C(C(C6=CC=C(C=C6)OC7=CC=CC=C7)=N4)C(N)=NC=N5)=O)=CC=C2)C(N1C8CCC(NC8=O)=O)=O	MT-781	https://www.ncbi.nlm.nih.gov/pubmed/29851337	Yale University	CRBN	Pomalidomide	BTK	829.915	3.59	3	14	18	209.92	1	5	0.84	25.16	12	PEG2	4	4.5
O=C1C2=C(C(N1C3CCC(NC3=O)=O)=O)C(NC(COCCCCOCCCCN4CCC(N5C6=C(C(N)=NC=N6)C(C7=CC=C(OC8=CC=CC=C8)C=C7)=N5)CC4)=O)=CC=C2	O=C1C2=C(C(N1C3CCC(NC3=O)=O)=O)C(NC(COCCCCOCCCCN4CCC(N5C6=C(C(N)=NC=N6)C(C7=CC=C(OC8=CC=CC=C8)C=C7)=N5)CC4)=O)=CC=C2	MT-541	https://www.ncbi.nlm.nih.gov/pubmed/29851337	Yale University	CRBN	Pomalidomide	BTK	843.942	3.98	3	14	19	209.92	1	5	1.51	25.49	13	PEG4	4	4.5
COC1=CC(C(C2=C3C=NC=C2)=CN(C)C3=O)=CC(OC)=C1CN4CCN(CCOCCOCCOCCOC5=CC(C6=C(C)N=CS6)=CC=C5CNC([C@@H]7C[C@@H](O)CN7C([C@H](C(C)(C)C)NC(C8(F)CC8)=O)=O)=O)CC4	COC1=CC(C(C2=C3C=NC=C2)=CN(C)C3=O)=CC(OC)=C1CN4CCN(CCOCCOCCOCCOC5=CC(C6=C(C)N=CS6)=CC=C5CNC([C@@H]7C[C@@H](O)CN7C([C@H](C(C)(C)C)NC(C8(F)CC8)=O)=O)=O)CC4	VZ 49	https://www.ncbi.nlm.nih.gov/pubmed/30540463	University of Dundee	VHL	VH101	BRD9	1085.3	4.76	3	16	29	205.63	2	4	1.77	34.23	14	PEG2	4	4.5
COC(C=C(C(C1=C2C=NC=C1)=CN(C)C2=O)C=C3OC)=C3CN4CCN(CCCCCOC5=CC(C6=C(C)N=CS6)=CC=C5CNC([C@@H]7C[C@@H](O)CN7C([C@H](C(C)(C)C)NC(C8(F)CC8)=O)=O)=O)CC4	COC(C=C(C(C1=C2C=NC=C1)=CN(C)C2=O)C=C3OC)=C3CN4CCN(CCCCCOC5=CC(C6=C(C)N=CS6)=CC=C5CNC([C@@H]7C[C@@H](O)CN7C([C@H](C(C)(C)C)NC(C8(F)CC8)=O)=O)=O)CC4	VZ 185	https://www.ncbi.nlm.nih.gov/pubmed/30540463	University of Dundee	VHL	VH101	BRD9	995.225	5.39	3	13	23	177.94	2	4	2.34	27.66	8	Alkyl	4	4.5
NC1=NC=NC2=C1C(C(C=C3)=CC=C3OC4=CC=CC=C4)=NN2[C@@H]5CN(C(C6=CN(CCOCCOCCOCCNC7=CC=CC(C(N8C9CCC(NC9=O)=O)=O)=C7C8=O)N=N6)=O)CCC5	NC1=NC=NC2=C1C(C(C=C3)=CC=C3OC4=CC=CC=C4)=NN2[C@@H]5CN(C(C6=CN(CCOCCOCCOCCNC7=CC=CC(C(N8C9CCC(NC9=O)=O)=O)=C7C8=O)N=N6)=O)CCC5	P13I	https://www.ncbi.nlm.nih.gov/pubmed/29875397	Tsinghua University	CRBN	Pomalidomide	BTK	912.965	2.48	3	18	20	247.11	0	6	2.93	26.07	12	PEG2	4	4.5
CC(C)S(C1=CC=CC=C1NC2=NC(NC3=CC=C(N4CCN(CNOCCOCCNC(CNC5=C(C(N(C6C(NC(CC6)=O)=O)C7=O)=O)C7=CC=C5)=O)CC4)C=C3OC)=NC=C2Cl)(=O)=O	CC(C)S(C1=CC=CC=C1NC2=NC(NC3=CC=C(N4CCN(CNOCCOCCNC(CNC5=C(C(N(C6C(NC(CC6)=O)=O)C7=O)=O)C7=CC=C5)=O)CC4)C=C3OC)=NC=C2Cl)(=O)=O	TL13-12	https://www.ncbi.nlm.nih.gov/pubmed/29660984	Dana-Farber Cancer Institute	CRBN	Pomalidomide	ALK	962.477	2.73	6	18	22	253.8	1	4	3.14	26.14	12	PEG2	5	4.5
O=C(CCC1N(C2=O)CC3=C2C=CC=C3CCCNC(C4=NC5=C(C6=CC(OC)=C(C=C6N5)C7=C(ON=C7C)C)C(NC8=CC(C9CC9)=NN8CC)=N4)=O)NC1=O	O=C(CCC1N(C2=O)CC3=C2C=CC=C3CCCNC(C4=NC5=C(C6=CC(OC)=C(C=C6N5)C7=C(ON=C7C)C)C(NC8=CC(C9CC9)=NN8CC)=N4)=O)NC1=O	Compound 25	https://www.ncbi.nlm.nih.gov/pubmed/?term=Discovery+of+a+Small-Molecule+Degrader+of+Bromodomain+and+Extra-Terminal+(BET)+Proteins+with+Picomolar+Cellular+Potencies+and+Capable	University of Michigan	CRBN	Based on Lenalidomide	BET	770.851	4.17	4	13	13	190.78	1	6	3.64	19.64	4	Alkyl	4	4.5
CC1=C(NC(C2=CN=C(NC3=CC(N4CCN(C(COCCOCCOC5=CC(C(C6=CSC([C@H]7CCCN7C([C@H](NC([C@@H](C)NC)=O)C8CCCCC8)=O)=N6)=O)=CC=C5)=O)CC4)=NC(C)=N3)S2)=O)C(Cl)=CC=C1	CC1=C(NC(C2=CN=C(NC3=CC(N4CCN(C(COCCOCCOC5=CC(C(C6=CSC([C@H]7CCCN7C([C@H](NC([C@@H](C)NC)=O)C8CCCCC8)=O)=N6)=O)=CC=C5)=O)CC4)=NC(C)=N3)S2)=O)C(Cl)=CC=C1	SNIPER(ABL)-38	https://www.ncbi.nlm.nih.gov/pubmed/28154167	National Instutite of Health Sciences	IAP	LCL161	BCR-ABL	1070.72	5.42	4	15	26	220.32	2	5	4.05	32.05	9	PEG2	4	4.5
COC1=C(OC)C(OC)=CC([C@@H](C(N2CCCC[C@H]2C(O[C@@H](C3=CC=CC=C3OCC(NCCCOCCOCCOCCCOC4=CC=CC(C(N5C6CC(NC(C6)=O)=O)=O)=C4C5=O)=O)CCC7=CC=C(OC)C(OC)=C7)=O)=O)CC)=C1	COC1=C(OC)C(OC)=CC([C@@H](C(N2CCCC[C@H]2C(O[C@@H](C3=CC=CC=C3OCC(NCCCOCCOCCOCCCOC4=CC=CC(C(N5C6CC(NC(C6)=O)=O)=O)=C4C5=O)=O)CCC7=CC=C(OC)C(OC)=C7)=O)=O)CC)=C1	dTAG 7	https://www.ncbi.nlm.nih.gov/pubmed/29581585	Dana-Farber Cancer Institute	CRBN	Thalidomide	FKBP12 F36V	1153.29	5.28	2	17	36	251.56	1	4	4.58	41.58	15	PEG2 alkyl	4	4.5
O=C(C1=CSC([C@H]2CCCN2C([C@H](NC([C@@H](C)NC)=O)C3CCCCC3)=O)=N1)C4=CC=CC(OCCOCCOCCOCCNC(CCCCCCOC5=C(OC(C=C6NC7=C(Cl)C=NC=C7Cl)=O)C6=CC=C5OC)=O)=C4	O=C(C1=CSC([C@H]2CCCN2C([C@H](NC([C@@H](C)NC)=O)C3CCCCC3)=O)=N1)C4=CC=CC(OCCOCCOCCOCCNC(CCCCCCOC5=C(OC(C=C6NC7=C(Cl)C=NC=C7Cl)=O)C6=CC=C5OC)=O)=C4	SNIPER(PDE4)-9	https://www.ncbi.nlm.nih.gov/pubmed/28154167	National Instutite of Health Sciences	IAP	LCL161	PDE4	1137.18	7.15	4	15	35	226.04	2	4	4.83	40.83	13	PEG2	5	4.5
CC/C(C1=CC=CC=C1)=C(C2=CC=C(C=C2)OCCN(C(COCCOCCOCCOCCNC([C@@H](NC([C@H]3N(CCC3)C([C@@H](NC([C@@H](NC)C)=O)C4CCCCC4)=O)=O)C(C5=CC=CC=C5)C6=CC=CC=C6)=O)=O)C)\C7=CC=C(C=C7)O	CC/C(C1=CC=CC=C1)=C(C2=CC=C(C=C2)OCCN(C(COCCOCCOCCOCCNC([C@@H](NC([C@H]3N(CCC3)C([C@@H](NC([C@@H](NC)C)=O)C4CCCCC4)=O)=O)C(C5=CC=CC=C5)C6=CC=CC=C6)=O)=O)C)\C7=CC=C(C=C7)O	SNIPER(ER)-22	https://www.ncbi.nlm.nih.gov/pubmed/28154167	National Instutite of Health Sciences	IAP	MV1	ERα	1151.46	7.39	5	12	38	206.33	3	5	6.4	46.4	15	PEG2	5	4.5
CC/C(C1=CC=CC=C1)=C(C2=CC=C(O)C=C2)/C3=CC=C(OCCN(C)C(COCCOCCNC([C@H](C(C4=CC=CC=C4)C5=CC=CC=C5)NC([C@H]6N(C([C@H](C7CCCCC7)NC([C@H](C)NC)=O)=O)CCC6)=O)=O)=O)C=C3	CC/C(C1=CC=CC=C1)=C(C2=CC=C(O)C=C2)/C3=CC=C(OCCN(C)C(COCCOCCNC([C@H](C(C4=CC=CC=C4)C5=CC=CC=C5)NC([C@H]6N(C([C@H](C7CCCCC7)NC([C@H](C)NC)=O)=O)CCC6)=O)=O)=O)C=C3	SNIPER(ER)-20	https://www.ncbi.nlm.nih.gov/pubmed/28154167	National Instutite of Health Sciences	IAP	MV1	ERα	1063.35	7.31	5	10	32	187.87	3	5	6.5	40.5	9	PEG2	4	4.5
ClC1=CC=C(C2=N[C@H](C3=NN=C(N3C4=C2C(C)=C(S4)C)C)CC(NCCN5N=NC(COCCOCCOCCOCCOC6=C(C7=CC=C6)C(N(C7=O)C8C(NC(CC8)=O)=O)=O)=C5)=O)C=C1	ClC1=CC=C(C2=N[C@H](C3=NN=C(N3C4=C2C(C)=C(S4)C)C)CC(NCCN5N=NC(COCCOCCOCCOCCOC6=C(C7=CC=C6)C(N(C7=O)C8C(NC(CC8)=O)=O)=O)=C5)=O)C=C1	11e	https://www.ncbi.nlm.nih.gov/pubmed/28378579	Amgen	CRBN	Thalidomide	BRD4	957.457	3.29	2	17	23	227.08	1	5	0.36	30.64	16	PEG2	4	4.4
ClC1=CC=C(C2=N[C@H](C3=NN=C(N3C4=C2C(C)=C(S4)C)C)CC(NCCN5N=NC(COCCOCCOCCOC6=C(C7=CC=C6)C(N(C7=O)C8C(NC(CC8)=O)=O)=O)=C5)=O)C=C1	ClC1=CC=C(C2=N[C@H](C3=NN=C(N3C4=C2C(C)=C(S4)C)C)CC(NCCN5N=NC(COCCOCCOCCOC6=C(C7=CC=C6)C(N(C7=O)C8C(NC(CC8)=O)=O)=O)=C5)=O)C=C1	11d	https://www.ncbi.nlm.nih.gov/pubmed/28378579	Amgen	CRBN	Thalidomide	BRD4	913.404	3.04	2	16	20	217.85	1	5	0.53	27.47	13	PEG2	4	4.4
ClC1=CC=C(C2=N[C@H](C3=NN=C(N3C4=C2C(C)=C(S4)C)C)CC(NCCN5N=NC(COC6=C(C7=CC=C6)C(N(C7=O)C8C(NC(CC8)=O)=O)=O)=C5)=O)C=C1	ClC1=CC=C(C2=N[C@H](C3=NN=C(N3C4=C2C(C)=C(S4)C)C)CC(NCCN5N=NC(COC6=C(C7=CC=C6)C(N(C7=O)C8C(NC(CC8)=O)=O)=O)=C5)=O)C=C1	11a	https://www.ncbi.nlm.nih.gov/pubmed/28378579	Amgen	CRBN	Thalidomide	BRD4	781.245	2.92	2	13	11	190.16	1	5	1.02	17.98	4	PEG2	4	4.4
ClC1=CC=C(C2=N[C@H](C3=NN=C(N3C4=C2C(C)=C(S4)C)C)CC(NCCN5N=NC(COCCOCC(N[C@H](C(N6[C@@H](C[C@H](C6)O)C(NCC7=CC=C(C=C7)C8=C(N=CS8)C)=O)=O)C(C)(C)C)=O)=C5)=O)C=C1	ClC1=CC=C(C2=N[C@H](C3=NN=C(N3C4=C2C(C)=C(S4)C)C)CC(NCCN5N=NC(COCCOCC(N[C@H](C(N6[C@@H](C[C@H](C6)O)C(NCC7=CC=C(C=C7)C8=C(N=CS8)C)=O)=O)C(C)(C)C)=O)=C5)=O)C=C1	12b	https://www.ncbi.nlm.nih.gov/pubmed/28378579	Amgen	VHL	VH032	BRD4	1039.67	4.54	4	15	24	226.94	3	6	1.54	31.46	9	PEG2	4	4.4
ClC1=CC=C(C2=N[C@H](C3=NN=C(N3C4=C2C(C)=C(S4)C)C)CC(NCCN5N=NC(COCC(N[C@H](C(N6[C@@H](C[C@H](C6)O)C(NCC7=CC=C(C=C7)C8=C(N=CS8)C)=O)=O)C(C)(C)C)=O)=C5)=O)C=C1	ClC1=CC=C(C2=N[C@H](C3=NN=C(N3C4=C2C(C)=C(S4)C)C)CC(NCCN5N=NC(COCC(N[C@H](C(N6[C@@H](C[C@H](C6)O)C(NCC7=CC=C(C=C7)C8=C(N=CS8)C)=O)=O)C(C)(C)C)=O)=C5)=O)C=C1	12a	https://www.ncbi.nlm.nih.gov/pubmed/28378579	Amgen	VHL	VH032	BRD4	995.616	4.63	4	14	21	217.71	3	6	1.7	28.3	6	PEG2	4	4.4
O=C1NC(CCC1N2C(C(C=CC=C3NCCOCCOCCOCCOCCOCCOC(N4C[C@H](N5N=C(C6=CC=C(OC7=CC=C(F)C=C7F)C=C6)C(C(N)=O)=C5N)CCC4)=O)=C3C2=O)=O)=O	O=C1NC(CCC1N2C(C(C=CC=C3NCCOCCOCCOCCOCCOCCOC(N4C[C@H](N5N=C(C6=CC=C(OC7=CC=C(F)C=C7F)C=C6)C(C(N)=O)=C5N)CCC4)=O)=C3C2=O)=O)=O	BTK PROTAC 10	https://www.ncbi.nlm.nih.gov/pubmed/30012605	Dana-Farber Cancer Institute	CRBN	Pomalidomide	BTK	976.989	3.32	4	18	27	265.21	0	4	3.04	31.04	19	PEG2	4	4.4
O=C1NC(CCC1N2C(C(C=CC=C3NCCNC(CN4CCC(C5=C(C)C=C(NC6=NC(NC7=C(S(=O)(C(C)C)=O)C=CC=C7)=C(Cl)C=N6)C(OC(C)C)=C5)CC4)=O)=C3C2=O)=O)=O	O=C1NC(CCC1N2C(C(C=CC=C3NCCNC(CN4CCC(C5=C(C)C=C(NC6=NC(NC7=C(S(=O)(C(C)C)=O)C=CC=C7)=C(Cl)C=N6)C(OC(C)C)=C5)CC4)=O)=C3C2=O)=O)=O	MS4078	https://www.ncbi.nlm.nih.gov/pubmed/29627725	Icahn School of Medicine	CRBN	Pomalidomide	ALK	914.476	4.86	5	14	17	220.07	1	4	4.84	22.84	5	Alkyl	5	4.4
CN1C=C(C2=CC(OC)=C(OCC(NCCCCCCCCNC(COC3=CC=CC(C(N4C5C(NC(CC5)=O)=O)=O)=C3C4=O)=O)=O)C=C2)C(SC(C(NC6CCS(CC6)(=O)=O)=N)=C7)=C7C1=O	CN1C=C(C2=CC(OC)=C(OCC(NCCCCCCCCNC(COC3=CC=CC(C(N4C5C(NC(CC5)=O)=O)=O)=C3C4=O)=O)=O)C=C2)C(SC(C(NC6CCS(CC6)(=O)=O)=N)=C7)=C7C1=O	Remillard 2	https://www.ncbi.nlm.nih.gov/pubmed/28418626	Dana-Farber Cancer Institute	CRBN	Thalidomide	BRD9	960.087	3.44	5	14	23	259.77	2	3	0	29	10	Alkyl	4	4.33333
CN1C=C(C2=CC(OC)=C(OCC(NCCCCCCOC3=CC=CC(C(N4C5C(NC(CC5)=O)=O)=O)=C3C4=O)=O)C=C2)C(SC(C(NC6CCS(CC6)(=O)=O)=N)=C7)=C7C1=O	CN1C=C(C2=CC(OC)=C(OCC(NCCCCCCOC3=CC=CC(C(N4C5C(NC(CC5)=O)=O)=O)=C3C4=O)=O)C=C2)C(SC(C(NC6CCS(CC6)(=O)=O)=N)=C7)=C7C1=O	Remillard 3	https://www.ncbi.nlm.nih.gov/pubmed/28418626	Dana-Farber Cancer Institute	CRBN	Thalidomide	BRD9	874.981	3.42	4	13	18	230.67	1	3	0.21	23.79	8	Alkyl	4	4.33333
CN1C=C(C2=CC(OC)=C(OCC(NCCCCCCCCNC3=CC4=C(C(N(C5C(NC(CC5)=O)=O)C4=O)=O)C=C3)=O)C=C2)C(SC(C(NC6CCS(CC6)(=O)=O)=N)=C7)=C7C1=O	CN1C=C(C2=CC(OC)=C(OCC(NCCCCCCCCNC3=CC4=C(C(N(C5C(NC(CC5)=O)=O)C4=O)=O)C=C3)=O)C=C2)C(SC(C(NC6CCS(CC6)(=O)=O)=N)=C7)=C7C1=O	Remillard S5	https://www.ncbi.nlm.nih.gov/pubmed/28418626	Dana-Farber Cancer Institute	CRBN	Based on Pomalodomide	BRD9	902.051	4.02	5	13	20	233.47	1	3	0.73	25.27	9	Alkyl	4	4.33333
ClC1=CC=C2C(NC([C@@]23C4(CCCCC4)N[C@@H](C(NC5=CC=C(C(NCCNC6=CC=CC(C7=O)=C6C(N7C8C(NC(CC8)=O)=O)=O)=O)C=C5)=O)[C@@H]3C9=CC=CC(Cl)=C9F)=O)=C1	ClC1=CC=C2C(NC([C@@]23C4(CCCCC4)N[C@@H](C(NC5=CC=C(C(NCCNC6=CC=CC(C7=O)=C6C(N7C8C(NC(CC8)=O)=O)=O)=O)C=C5)=O)[C@@H]3C9=CC=CC(Cl)=C9F)=O)=C1	YL 4	https://www.ncbi.nlm.nih.gov/pubmed/30525597/	Uni Michigan	CRBN	Pomalidomide	MDM2	880.755	4.53	6	10	11	194.91	2	4	3.85	15.85	3	alkyl	5	4.33333
O=C1N(C2C(NC(CC2)=O)=O)C(C3=C(NCCCNC(C4=CC=C(C=C4)NC([C@@H]([C@@H]5C6=CC=CC(Cl)=C6F)NC7(CCCCC7)[C@@]5(C8=CC=C(Cl)C=C8N9)C9=O)=O)=O)C=CC=C31)=O	O=C1N(C2C(NC(CC2)=O)=O)C(C3=C(NCCCNC(C4=CC=C(C=C4)NC([C@@H]([C@@H]5C6=CC=CC(Cl)=C6F)NC7(CCCCC7)[C@@]5(C8=CC=C(Cl)C=C8N9)C9=O)=O)=O)C=CC=C31)=O	YL 5	https://www.ncbi.nlm.nih.gov/pubmed/30525597/	Uni Michigan	CRBN	Pomalidomide	MDM2	894.782	4.93	6	10	12	194.91	2	4	3.91	16.91	4	alkyl	5	4.33333
CC1=CC=CC(Cl)=C1NC(C2=CN=C(NC3=CC(N4CCN(C(COCCOCCOCCOC5=CC(C(C6=CSC([C@H]7N(C([C@@H](C8CCCCC8)NC([C@H](NC)C)=O)=O)CCC7)=N6)=O)=CC=C5)=O)CC4)=NC(C)=N3)S2)=O	CC1=CC=CC(Cl)=C1NC(C2=CN=C(NC3=CC(N4CCN(C(COCCOCCOCCOC5=CC(C(C6=CSC([C@H]7N(C([C@@H](C8CCCCC8)NC([C@H](NC)C)=O)=O)CCC7)=N6)=O)=CC=C5)=O)CC4)=NC(C)=N3)S2)=O	DAS-IAP	https://www.ncbi.nlm.nih.gov/pubmed/30202081/	National Instutite of Health Sciences	IAP	LCL161	BCR-ABL	1114.78	5.54	4	16	29	229.55	2	5	3.93	34.93	11	PEG2	4	4.33333
S=C1N(C2=CC=C(C#CC3CCN(C4CCN(C(C[C@H](NC([C@@H]5C[C@@H](O)CN5C([C@@H](C6=CC(C)=NO6)C(C)C)=O)=O)C7=CC=C(C8=C(C)N=CS8)C=C7)=O)CC4)CC3)C=C2)C9(CCC9)C(N1C%10=CN=C(C#N)C(C(F)(F)F)=C%10)=O	S=C1N(C2=CC=C(C#CC3CCN(C4CCN(C(C[C@H](NC([C@@H]5C[C@@H](O)CN5C([C@@H](C6=CC(C)=NO6)C(C)C)=O)=O)C7=CC=C(C8=C(C)N=CS8)C=C7)=O)CC4)CC3)C=C2)C9(CCC9)C(N1C%10=CN=C(C#N)C(C(F)(F)F)=C%10)=O	WS 30	https://www.ncbi.nlm.nih.gov/pubmed/?term=30629437	Uni Michigan	VHL	Based on VH032	AR	1115.31	6.07	2	14	19	186.84	1	5	3.94	24.94	10	alkyne piperidine piperidine	5	4.33333
CN(CCCNC1=C(C)C=NC(NC2=CC=C(OCCCOCCCCOCCCOCC(=O)N[C@H](C(=O)N3C[C@H](O)C[C@H]3C(=O)NCC3=CC=C(C=C3)C3=C(C)N=CS3)C(C)(C)C)C=C2)=N1)C(=O)C1CCC1	CN(CCCNC1=C(C)C=NC(NC2=CC=C(OCCCOCCCCOCCCOCC(=O)N[C@H](C(=O)N3C[C@H](O)C[C@H]3C(=O)NCC3=CC=C(C=C3)C3=C(C)N=CS3)C(C)(C)C)C=C2)=N1)C(=O)C1CCC1	5f	https://www.ncbi.nlm.nih.gov/pubmed/28692295	Yale University	VHL	VH032	TBK1	1028.32	5.94	5	14	35	217.11	2	4	4.04	40.04	16	PEG4 PEG3	4	4.33333
ClC1=CC(O[C@H]2C(C)(C)[C@H](NC(C3=CC=C(C#CC4CCN(C5CCN(C(C[C@H](NC([C@@H]6C[C@@H](O)CN6C([C@@H](NC(C)=O)C(C)(C)C)=O)=O)C7=CC=C(C8=C(C)N=CS8)C=C7)=O)CC5)CC4)C=C3)=O)C2(C)C)=CC=C1C#N	ClC1=CC(O[C@H]2C(C)(C)[C@H](NC(C3=CC=C(C#CC4CCN(C5CCN(C(C[C@H](NC([C@@H]6C[C@@H](O)CN6C([C@@H](NC(C)=O)C(C)(C)C)=O)=O)C7=CC=C(C8=C(C)N=CS8)C=C7)=O)CC5)CC4)C=C3)=O)C2(C)C)=CC=C1C#N	WS 36	https://www.ncbi.nlm.nih.gov/pubmed/?term=30629437	Uni Michigan	VHL	Based on VH032	AR	1085.8	6.84	4	10	22	196.77	3	4	4.09	27.09	10	alkyne piperidine piperidine	4	4.33333
O=C1N(C2C(NC(CC2)=O)=O)C(C3=C(NCCCCNC(C4=CC=C(C=C4)NC([C@@H]([C@@H]5C6=CC=CC(Cl)=C6F)NC7(CCCCC7)[C@@]5(C8=CC=C(Cl)C=C8N9)C9=O)=O)=O)C=CC=C31)=O	O=C1N(C2C(NC(CC2)=O)=O)C(C3=C(NCCCCNC(C4=CC=C(C=C4)NC([C@@H]([C@@H]5C6=CC=CC(Cl)=C6F)NC7(CCCCC7)[C@@]5(C8=CC=C(Cl)C=C8N9)C9=O)=O)=O)C=CC=C31)=O	YL 1	https://www.ncbi.nlm.nih.gov/pubmed/30525597/	Uni Michigan	CRBN	Pomalidomide	MDM2	908.809	5.28	6	10	13	194.91	2	4	4.43	18.43	5	alkyl	5	4.33333
S=C1N(C2=CC=C(C#CC3CCN(C4CCN(C(C[C@H](NC([C@@H]5C[C@@H](O)CN5C([C@@H](C6=CC(C)=NO6)C(C)C)=O)=O)C7=CC=C(C8=C(C)N=CS8)C=C7)=O)CC4)CC3)C=C2)C(C)(C)C(N1C9=CC=C(C#N)C(C(F)(F)F)=C9)=O	S=C1N(C2=CC=C(C#CC3CCN(C4CCN(C(C[C@H](NC([C@@H]5C[C@@H](O)CN5C([C@@H](C6=CC(C)=NO6)C(C)C)=O)=O)C7=CC=C(C8=C(C)N=CS8)C=C7)=O)CC4)CC3)C=C2)C(C)(C)C(N1C9=CC=C(C#N)C(C(F)(F)F)=C9)=O	WS 29	https://www.ncbi.nlm.nih.gov/pubmed/?term=30629437	Uni Michigan	VHL	Based on VH032	AR	1102.31	7.32	2	13	19	174.48	1	5	4.64	25.64	10	alkyne piperidine piperidine	5	4.33333
ClC1=CC=C2C(NC([C@@]23C4(CCCCC4)N[C@@H](C(NC5=CC=C(C(NCCCC#CC6=CC=C(C(N(C7CCC(NC7=O)=O)C8)=O)C8=C6)=O)C=C5)=O)[C@@H]3C9=CC=CC(Cl)=C9F)=O)=C1	ClC1=CC=C2C(NC([C@@]23C4(CCCCC4)N[C@@H](C(NC5=CC=C(C(NCCCC#CC6=CC=C(C(N(C7CCC(NC7=O)=O)C8)=O)C8=C6)=O)C=C5)=O)[C@@H]3C9=CC=CC(Cl)=C9F)=O)=C1	YL 16	https://www.ncbi.nlm.nih.gov/pubmed/30525597/	Uni Michigan	CRBN	Lenalidomide	MDM2	889.806	5.58	5	8	12	165.81	2	4	4.97	17.97	6	alkyne	4	4.33333
ClC1=CC=C2C(NC([C@@]23C4(CCCCC4)N[C@@H](C(NC5=CC=C(C(NCCCC#CC6=CC=C7C(C(N(C8CCC(NC8=O)=O)C7)=O)=C6)=O)C=C5)=O)[C@@H]3C9=CC=CC(Cl)=C9F)=O)=C1	ClC1=CC=C2C(NC([C@@]23C4(CCCCC4)N[C@@H](C(NC5=CC=C(C(NCCCC#CC6=CC=C7C(C(N(C8CCC(NC8=O)=O)C7)=O)=C6)=O)C=C5)=O)[C@@H]3C9=CC=CC(Cl)=C9F)=O)=C1	YL 17	https://www.ncbi.nlm.nih.gov/pubmed/30525597/	Uni Michigan	CRBN	Lenalidomide	MDM2	889.806	5.57	5	8	12	165.81	2	4	4.97	17.97	6	alkyne	4	4.33333
CN(CCCNC1=C(Br)C=NC(NC2=CC=C(OCCCCOCCCCOCCCCCC(=O)N[C@H](C(=O)N3C[C@H](O)C[C@H]3C(=O)NCC3=CC=C(C=C3)C3=C(C)N=CS3)C(C)(C)C)C=C2)=N1)C(=O)C1CCC1	CN(CCCNC1=C(Br)C=NC(NC2=CC=C(OCCCCOCCCCOCCCCCC(=O)N[C@H](C(=O)N3C[C@H](O)C[C@H]3C(=O)NCC3=CC=C(C=C3)C3=C(C)N=CS3)C(C)(C)C)C=C2)=N1)C(=O)C1CCC1	3j	https://www.ncbi.nlm.nih.gov/pubmed/28692295	Yale University	VHL	VH032	TBK1	1105.25	7.26	5	13	36	207.88	2	4	6.22	43.22	17	PEG4 alkyl	5	4.33333
CC(C)([C@H](NC(CN1C=C(CCCCN(CCOC2=CC=C(C(C3=C(SC4=CC(O)=CC=C34)C(C=C5)=CC=C5O)=O)C=C2)CC)C=N1)=O)C(N6C[C@@H](C[C@H]6C(N[C@H](C(C=C7)=CC=C7C(SC=N8)=C8C)C)=O)O)=O)C	CC(C)([C@H](NC(CN1C=C(CCCCN(CCOC2=CC=C(C(C3=C(SC4=CC(O)=CC=C34)C(C=C5)=CC=C5O)=O)C=C2)CC)C=N1)=O)C(N6C[C@@H](C[C@H]6C(N[C@H](C(C=C7)=CC=C7C(SC=N8)=C8C)C)=O)O)=O)C	SW 37	https://pubs.acs.org/doi/abs/10.1021/acs.jmedchem.8b01572	Uni Michigan	VHL	VH032	ER	1040.31	7.02	5	12	25	196.7	2	7	6.23	35.23	9	alkyl pyrazole	5	4.33333
OC1=CC=C2C(SC(C3=CC=C(O)C=C3)=C2C(C4=CC=C(OCCN(CCCCCC(N[C@@H](C(C)(C)C)C(N5[C@H](C(N[C@@H](C)C6=CC=C(C7=C(C)N=CS7)C=C6)=O)C[C@@H](O)C5)=O)=O)CC)C=C4)=O)=C1	OC1=CC=C2C(SC(C3=CC=C(O)C=C3)=C2C(C4=CC=C(OCCN(CCCCCC(N[C@@H](C(C)(C)C)C(N5[C@H](C(N[C@@H](C)C6=CC=C(C7=C(C)N=CS7)C=C6)=O)C[C@@H](O)C5)=O)=O)CC)C=C4)=O)=C1	SW 18	https://pubs.acs.org/doi/abs/10.1021/acs.jmedchem.8b01572	Uni Michigan	VHL	VH032	ER	974.245	7.25	5	10	24	181.1	2	6	6.31	33.31	6	alkyl	4	4.33333
O=C(N[C@H](C(N1C[C@@H](C[C@H]1C(N[C@H](C(C=C2)=CC=C2C(SC=N3)=C3C)C)=O)O)=O)C(C)(C)C)CN4N=CC(C#CCCN(CCOC5=CC=C(C(C6=C(SC7=CC(O)=CC=C67)C(C=C8)=CC=C8O)=O)C=C5)CC)=C4	O=C(N[C@H](C(N1C[C@@H](C[C@H]1C(N[C@H](C(C=C2)=CC=C2C(SC=N3)=C3C)C)=O)O)=O)C(C)(C)C)CN4N=CC(C#CCCN(CCOC5=CC=C(C(C6=C(SC7=CC(O)=CC=C67)C(C=C8)=CC=C8O)=O)C=C5)CC)=C4	SW 36	https://pubs.acs.org/doi/abs/10.1021/acs.jmedchem.8b01572	Uni Michigan	VHL	VH032	ER	1036.28	7.02	5	12	24	196.7	2	7	6.56	34.56	9	alkyne pyrazole	5	4.33333
CN[C@@H](C)C(N([C@H](C(N1CCC[C@H]1C2=NC(C(C3=CC=CC(OCCOCCOCCOCC(N(CCOC4=CC=C(C=C4)/C(C5=CC=C(C=C5)O)=C(C6=CC=CC=C6)/CC)C)=O)=C3)=O)=CS2)=O)C7CCCCC7)C)=O	CN[C@@H](C)C(N([C@H](C(N1CCC[C@H]1C2=NC(C(C3=CC=CC(OCCOCCOCCOCC(N(CCOC4=CC=C(C=C4)/C(C5=CC=C(C=C5)O)=C(C6=CC=CC=C6)/CC)C)=O)=C3)=O)=CS2)=O)C7CCCCC7)C)=O	SNIPER(ER)-143	https://www.ncbi.nlm.nih.gov/pubmed/28154167	National Instutite of Health Sciences	IAP	Based on LCL161 (N-methylated analog)	ERα	1058.35	7.47	2	12	31	168.77	0	5	7.3	40.3	12	PEG2	5	4.33333
OC1=CC=C2C(SC(C3=CC=C(O)C=C3)=C2C(C4=CC=C(OCCN(CC)CCCCCCCC(N[C@@H](C(C)(C)C)C(N5[C@H](C(N[C@@H](C)C6=CC=C(C(C)(C)C)C=C6)=O)C[C@@H](O)C5)=O)=O)C=C4)=O)=C1	OC1=CC=C2C(SC(C3=CC=C(O)C=C3)=C2C(C4=CC=C(OCCN(CC)CCCCCCCC(N[C@@H](C(C)(C)C)C(N5[C@H](C(N[C@@H](C)C6=CC=C(C(C)(C)C)C=C6)=O)C[C@@H](O)C5)=O)=O)C=C4)=O)=C1	SW 48	https://pubs.acs.org/doi/abs/10.1021/acs.jmedchem.8b01572	Uni Michigan	VHL	VH032	ER	961.272	8.35	5	9	26	168.74	2	5	8.31	36.31	8	alkyl	4	4.33333
O=C1NC(CCC1N2C(C(C(NCCOCCNC3=CC=CC(C4=O)=C3C(N4C5C(NC(CC5)=O)=O)=O)=CC=C6)=C6C2=O)=O)=O	O=C1NC(CCC1N2C(C(C(NCCOCCNC3=CC=CC(C4=O)=C3C(N4C5C(NC(CC5)=O)=O)=O)=CC=C6)=C6C2=O)=O)=O	15e	https://www.ncbi.nlm.nih.gov/pubmed/30118587	University of Bonn	CRBN	Pomalidomide	CRBN	616.587	0.54	4	11	10	200.39	0	2	0.06	14.94	5	PEG2	3	4.25
O=C(NC1=O)CCC1N2C(C3=C(C=CC=C3C2=O)OCC(NCCOCCC(N4CCN(CC4)CC5=NC6=C(C=C5)C=C(C(NC7=CC(NC(C8=CC9=C(C=C8)OCCO9)=O)=CC=C7F)=O)C=C6)=O)=O)=O	O=C(NC1=O)CCC1N2C(C3=C(C=CC=C3C2=O)OCC(NCCOCCC(N4CCN(CC4)CC5=NC6=C(C=C5)C=C(C(NC7=CC(NC(C8=CC9=C(C=C8)OCCO9)=O)=CC=C7F)=O)C=C6)=O)=O)=O	Compound 10	https://www.ncbi.nlm.nih.gov/pubmed/?term=Demonstrating+In-Cell+Target+Engagement+Using+a+Pirin+Protein+Degradation+Probe+(CCT367766)	ICR	CRBN	Thalidomide	Pirin	970.968	2.65	4	15	20	243.68	3	5	1.05	26.95	16	PEG2 Piperazine	4	4.25
CC1=C(C2=CC=C(C=C2)CNC([C@@H]3C[C@H](CN3C([C@H](C(C)(C)C)NC(CCCCCOCCOCCOCCOCCOCCOCCCCCCNC4=CC=CC(C(N5C6CCC(NC6=O)=O)=O)=C4C5=O)=O)=O)O)=O)SC=N1	CC1=C(C2=CC=C(C=C2)CNC([C@@H]3C[C@H](CN3C([C@H](C(C)(C)C)NC(CCCCCOCCOCCOCCOCCOCCOCCCCCCNC4=CC=CC(C(N5C6CCC(NC6=O)=O)=O)=C4C5=O)=O)=O)O)=O)SC=N1	CRBN-6-(2)5-6-VHL	https://www.ncbi.nlm.nih.gov/pubmed/30672516	Uni Bonn	VHL	VH032	CRBN	1120.37	4.8	5	16	40	262.06	2	3	3.11	43.11	28	Alkyl PEG2	4	4.25
CC1=C(C2=CC=C(C=C2)CNC([C@@H]3C[C@H](CN3C([C@H](C(C)(C)C)NC(CCCCCOCCCCOCCCCOCCCCOCCCCCCNC4=CC=CC(C(N5C6CCC(NC6=O)=O)=O)=C4C5=O)=O)=O)O)=O)SC=N1	CC1=C(C2=CC=C(C=C2)CNC([C@@H]3C[C@H](CN3C([C@H](C(C)(C)C)NC(CCCCCOCCCCOCCCCOCCCCOCCCCCCNC4=CC=CC(C(N5C6CCC(NC6=O)=O)=O)=C4C5=O)=O)=O)O)=O)SC=N1	CRBN-6-(4)3-6-VHL	https://www.ncbi.nlm.nih.gov/pubmed/30672516	Uni Bonn	CRBN	VH032	CRBN	1116.43	6.29	5	14	40	243.6	2	3	4.93	44.93	28	Alkyl PEG4	4	4.25
CN[C@H](C(N[C@@H](C1CCCCC1)C(N2CCC[C@H]2C3=NC(C(C4=CC=CC(OCCOCCOCCOCCOCC(N(C)CCOC5=CC=C(/C(C6=CC=C(O)C=C6)=C(CC)\C7=CC=CC=C7)C=C5)=O)=C4)=O)=CS3)=O)=O)C	CN[C@H](C(N[C@@H](C1CCCCC1)C(N2CCC[C@H]2C3=NC(C(C4=CC=CC(OCCOCCOCCOCCOCC(N(C)CCOC5=CC=C(/C(C6=CC=C(O)C=C6)=C(CC)\C7=CC=CC=C7)C=C5)=O)=C4)=O)=CS3)=O)=O)C	SNIPER(ER)-88	https://www.ncbi.nlm.nih.gov/pubmed/28154167	National Instutite of Health Sciences	IAP	LCL161	ERα	1088.37	7.42	3	13	34	186.79	1	5	7.03	43.03	15	PEG2	5	4.25
O=C(N[C@H](C(N1[C@@H](C[C@H](C1)O)C(NCC2=CC=C(C=C2)C3=C(N=CS3)C)=O)=O)C(C)(C)C)COCCOCCOCCOCCOCC4=CN(CCNC(C[C@@H]5N=C(C6=C(N7C5=NN=C7C)SC(C)=C6C)C8=CC=C(C=C8)Cl)=O)N=N4	O=C(N[C@H](C(N1[C@@H](C[C@H](C1)O)C(NCC2=CC=C(C=C2)C3=C(N=CS3)C)=O)=O)C(C)(C)C)COCCOCCOCCOCCOCC4=CN(CCNC(C[C@@H]5N=C(C6=C(N7C5=NN=C7C)SC(C)=C6C)C8=CC=C(C=C8)Cl)=O)N=N4	12e	https://www.ncbi.nlm.nih.gov/pubmed/28378579	Amgen	VHL	VH032	BRD4	1171.83	4.81	4	18	33	254.63	3	6	1.05	40.95	18	PEG2	4	4.2
O=C(N[C@H](C(N1[C@@H](C[C@H](C1)O)C(NCC2=CC=C(C=C2)C3=C(N=CS3)C)=O)=O)C(C)(C)C)COCCOCCOCCOCC4=CN(CCNC(C[C@@H]5N=C(C6=C(N7C5=NN=C7C)SC(C)=C6C)C8=CC=C(C=C8)Cl)=O)N=N4	O=C(N[C@H](C(N1[C@@H](C[C@H](C1)O)C(NCC2=CC=C(C=C2)C3=C(N=CS3)C)=O)=O)C(C)(C)C)COCCOCCOCCOCC4=CN(CCNC(C[C@@H]5N=C(C6=C(N7C5=NN=C7C)SC(C)=C6C)C8=CC=C(C=C8)Cl)=O)N=N4	12d	https://www.ncbi.nlm.nih.gov/pubmed/28378579	Amgen	VHL	VH032	BRD4	1127.78	4.48	4	17	30	245.4	3	6	1.21	37.79	15	PEG2	4	4.2
O=C(N[C@H](C(N1[C@@H](C[C@H](C1)O)C(NCC2=CC=C(C=C2)C3=C(N=CS3)C)=O)=O)C(C)(C)C)COCCOCCOCC4=CN(CCNC(C[C@@H]5N=C(C6=C(N7C5=NN=C7C)SC(C)=C6C)C8=CC=C(C=C8)Cl)=O)N=N4	O=C(N[C@H](C(N1[C@@H](C[C@H](C1)O)C(NCC2=CC=C(C=C2)C3=C(N=CS3)C)=O)=O)C(C)(C)C)COCCOCCOCC4=CN(CCNC(C[C@@H]5N=C(C6=C(N7C5=NN=C7C)SC(C)=C6C)C8=CC=C(C=C8)Cl)=O)N=N4	12c	https://www.ncbi.nlm.nih.gov/pubmed/28378579	Amgen	VHL	VH032	BRD4	1083.72	4.5	4	16	27	236.17	3	6	1.38	34.62	12	PEG2	4	4.2
CC1=C(C2=CC=C(CNC([C@@H]3C[C@@H](C)CN3C([C@@H](NC(COCCOCCOCCOCCOCC(N[C@@H](C(C)(C)C)C(N4C[C@H](C)C[C@H]4C(NCC(C=C5)=CC=C5C(SC=N6)=C6C)=O)=O)=O)=O)C(C)(C)C)=O)=O)C=C2)SC=N1	CC1=C(C2=CC=C(CNC([C@@H]3C[C@@H](C)CN3C([C@@H](NC(COCCOCCOCCOCCOCC(N[C@@H](C(C)(C)C)C(N4C[C@H](C)C[C@H]4C(NCC(C=C5)=CC=C5C(SC=N6)=C6C)=O)=O)=O)=O)C(C)(C)C)=O)=O)C=C2)SC=N1	CM10	https://www.ncbi.nlm.nih.gov/pubmed/29018234	University of Dundee	VHL	VH032	VHL	1131.46	5.73	4	13	36	227.89	4	4	3.7	40.7	17	PEG2	4	4.2
O=C(NCCNC1=CC=CC(C(N2C3CCC(NC3=O)=O)=O)=C1C2=O)COCCOCCOCCOCCN(CC4)CCN4CC5=C(OC)C=C(C(C6=C7C=NC=C6)=CN(C)C7=O)C=C5OC	O=C(NCCNC1=CC=CC(C(N2C3CCC(NC3=O)=O)=O)=C1C2=O)COCCOCCOCCOCCN(CC4)CCN4CC5=C(OC)C=C(C(C6=C7C=NC=C6)=CN(C)C7=O)C=C5OC	VZ 8	https://www.ncbi.nlm.nih.gov/pubmed/30540463	University of Dundee	CRBN	Pomalidomide	BRD9	927.025	1.61	3	16	25	219.21	1	3	-0.52	31.52	20	PEG2	4	4
O=C1NC(CCC1N2C(C(C(NCCCOCCOCCCNC3=CC=CC(C4=O)=C3C(N4C5C(NC(CC5)=O)=O)=O)=CC=C6)=C6C2=O)=O)=O	O=C1NC(CCC1N2C(C(C(NCCCOCCOCCCNC3=CC=CC(C4=O)=C3C(N4C5C(NC(CC5)=O)=O)=O)=CC=C6)=C6C2=O)=O)=O	15b	https://www.ncbi.nlm.nih.gov/pubmed/30118587	University of Bonn	CRBN	Pomalidomide	CRBN	688.694	1.18	4	12	15	209.62	0	2	0.13	31.07	10	PEG2 PEG3	4	4
CN1C=C(C2=CC(OC)=C(CN(C)CC(NCCCCCCNC3=CC(C(N(C4C(NC(CC4)=O)=O)C5=O)=O)=C5C=C3)=O)C(OC)=C2)C(C=CN=C6)=C6C1=O	CN1C=C(C2=CC(OC)=C(CN(C)CC(NCCCCCCNC3=CC(C(N(C4C(NC(CC4)=O)=O)C5=O)=O)=C5C=C3)=O)C(OC)=C2)C(C=CN=C6)=C6C1=O	Remillar S6	https://www.ncbi.nlm.nih.gov/pubmed/28418626	Dana-Farber Cancer Institute	CRBN	Pomalidomide	BRD9	751.841	2.69	3	11	17	179.05	1	3	1.06	21.94	6	Alkyl	4	4
CC1=C(SC=N1)C2=CC=C(CNC([C@@H]3C[C@@H](O)CN3C([C@H](C(C)(C)C)NC(C4(F)CC4)=O)=O)=O)C(OCCOCC(NC5CN(CC6=C(OC)C=C(C(C7=C8C=NC=C7)=CN(C)C8=O)C=C6OC)C5)=O)=C2	CC1=C(SC=N1)C2=CC=C(CNC([C@@H]3C[C@@H](O)CN3C([C@H](C(C)(C)C)NC(C4(F)CC4)=O)=O)=O)C(OCCOCC(NC5CN(CC6=C(OC)C=C(C(C7=C8C=NC=C7)=CN(C)C8=O)C=C6OC)C5)=O)=C2	VZ 55	https://www.ncbi.nlm.nih.gov/pubmed/30540463	University of Dundee	VHL	VH101	BRD9	997.153	3.88	4	14	24	213.03	3	4	1.23	29.77	8	PEG2	4	4
COC(C=C(C(C1=C2C=NC=C1)=CN(C)C2=O)C(OC)=C3)=C3CN4CCN(CCOCCOCCOC5=CC(C6=C(C)N=CS6)=CC=C5CNC([C@@H]7C[C@@H](O)CN7C([C@H](C(C)(C)C)NC(C8(F)CC8)=O)=O)=O)CC4	COC(C=C(C(C1=C2C=NC=C1)=CN(C)C2=O)C(OC)=C3)=C3CN4CCN(CCOCCOCCOC5=CC(C6=C(C)N=CS6)=CC=C5CNC([C@@H]7C[C@@H](O)CN7C([C@H](C(C)(C)C)NC(C8(F)CC8)=O)=O)=O)CC4	VZ 48	https://www.ncbi.nlm.nih.gov/pubmed/30540463	University of Dundee	VHL	VH101	BRD9	1041.25	4.39	3	15	26	196.4	2	4	1.76	31.24	11	PEG2	4	4
ClC(C=C1)=CC=C1C2=N[C@@H](CC(NCCOCCCOCC(N[C@@H](C(C)(C)C)C(N3[C@H](C(N[C@@H](C)C4=CC=C(C5=C(C)N=CS5)C=C4)=O)C[C@@H](O)C3)=O)=O)=O)C6=NN=C(C)N6C7=C2C(C)=C(C)S7	ClC(C=C1)=CC=C1C2=N[C@@H](CC(NCCOCCCOCC(N[C@@H](C(C)(C)C)C(N3[C@H](C(N[C@@H](C)C4=CC=C(C5=C(C)N=CS5)C=C4)=O)C[C@@H](O)C3)=O)=O)=O)C6=NN=C(C)N6C7=C2C(C)=C(C)S7	ARV-771	https://www.ncbi.nlm.nih.gov/pubmed/27274052	Arvinas	VHL	VH032	BRD4	986.645	5.71	4	12	23	198.98	3	5	2.37	28.63	10	PEG3	5	4
O=C1NC(CCC1N2C(C(C=CC=C3NCCOCCOCCOCCOCCOC(N4C[C@H](N5N=C(C6=CC=C(OC7=CC=C(F)C=C7F)C=C6)C(C(N)=O)=C5N)CCC4)=O)=C3C2=O)=O)=O	O=C1NC(CCC1N2C(C(C=CC=C3NCCOCCOCCOCCOCCOC(N4C[C@H](N5N=C(C6=CC=C(OC7=CC=C(F)C=C7F)C=C6)C(C(N)=O)=C5N)CCC4)=O)=C3C2=O)=O)=O	BTK PROTAC 8	https://www.ncbi.nlm.nih.gov/pubmed/30012605	Dana-Farber Cancer Institute	CRBN	Pomalidomide	BTK	932.936	3.27	4	17	24	255.98	0	4	3.09	28.09	16	PEG2	4	4
CC(C)C[C@H](NC(=O)[C@@H](O)[C@H](N)CC1=CC=CC=C1)C(=O)NCCOCCOCCOCCNC(=O)C1=CC=C(CN2C(C)=C(C#N)C(=C2C)C2=CC=C(C=C2)C#N)C=C1	CC(C)C[C@H](NC(=O)[C@@H](O)[C@H](N)CC1=CC=CC=C1)C(=O)NCCOCCOCCOCCNC(=O)C1=CC=C(CN2C(C)=C(C#N)C(=C2C)C2=CC=C(C=C2)C#N)C=C1	SNIPER(AR)-2	https://www.ncbi.nlm.nih.gov/pubmed/28594553	National Instutite of Health Sciences	IAP	Bestatin	AR	820.004	4.08	5	11	29	212.06	3	4	3.11	33.11	12	PEG2	4	4
CC(C)C[C@H](NC(=O)[C@@H](O)[C@H](N)CC1=CC=CC=C1)C(=O)NCCOCCOCCOCCNC(=O)C1=CC=C(CC2=C(C)N(N=C2C)C2=CC(=C(C=C2)C#N)C(F)(F)F)C=C1	CC(C)C[C@H](NC(=O)[C@@H](O)[C@H](N)CC1=CC=CC=C1)C(=O)NCCOCCOCCOCCNC(=O)C1=CC=C(CC2=C(C)N(N=C2C)C2=CC(=C(C=C2)C#N)C(F)(F)F)C=C1	SNIPER(AR)-23	https://www.ncbi.nlm.nih.gov/pubmed/28594553	National Instutite of Health Sciences	IAP	Bestatin	AR	863.98	5.01	5	14	29	200.63	3	4	3.57	33.57	12	PEG2	4	4
ClC1=CC=C2C(NC([C@@]23C4(CCCCC4)N[C@@H](C(NC5=CC=C(C(NCCOCCOCCOCCNC6=CC=CC(C7=O)=C6C(N7C8C(NC(CC8)=O)=O)=O)=O)C=C5)=O)[C@@H]3C9=CC=CC(Cl)=C9F)=O)=C1	ClC1=CC=C2C(NC([C@@]23C4(CCCCC4)N[C@@H](C(NC5=CC=C(C(NCCOCCOCCOCCNC6=CC=CC(C7=O)=C6C(N7C8C(NC(CC8)=O)=O)=O)=O)C=C5)=O)[C@@H]3C9=CC=CC(Cl)=C9F)=O)=C1	YL 10	https://www.ncbi.nlm.nih.gov/pubmed/30525597/	Uni Michigan	CRBN	Pomalidomide	MDM2	1012.91	4.74	6	13	20	222.6	2	4	3.71	24.71	12	PEG2	5	4
CC(C)C[C@H](NC(=O)[C@@H](O)[C@H](N)CC1=CC=CC=C1)C(=O)NCCOCCOCCOCCNC(=O)C1=CC=C(CCC2=C(C)N(N=C2C)C2=CC(Cl)=C(C=C2)C#N)C=C1	CC(C)C[C@H](NC(=O)[C@@H](O)[C@H](N)CC1=CC=CC=C1)C(=O)NCCOCCOCCOCCNC(=O)C1=CC=C(CCC2=C(C)N(N=C2C)C2=CC(Cl)=C(C=C2)C#N)C=C1	SNIPER(AR)-26	https://www.ncbi.nlm.nih.gov/pubmed/28594553	National Instutite of Health Sciences	IAP	Bestatin	AR	844.451	4.81	5	11	29	200.63	3	4	3.74	33.74	12	PEG2	4	4
ClC1=CC=C2C(NC([C@@]23C4(CCCCC4)N[C@@H](C(NC5=CC=C(C(NCCOCCNC6=CC=CC(C7=O)=C6C(N7C8C(NC(CC8)=O)=O)=O)=O)C=C5)=O)[C@@H]3C9=CC=CC(Cl)=C9F)=O)=C1	ClC1=CC=C2C(NC([C@@]23C4(CCCCC4)N[C@@H](C(NC5=CC=C(C(NCCOCCNC6=CC=CC(C7=O)=C6C(N7C8C(NC(CC8)=O)=O)=O)=O)C=C5)=O)[C@@H]3C9=CC=CC(Cl)=C9F)=O)=C1	YL 9	https://www.ncbi.nlm.nih.gov/pubmed/30525597/	Uni Michigan	CRBN	Pomalidomide	MDM2	924.808	4.61	6	11	14	204.14	2	4	3.81	18.81	6	PEG2	5	4
CN(CCCNC1=NC(NC2=CC=C(OCCCCOCCOCCOCC(=O)N[C@H](C(=O)N3C[C@H](O)C[C@H]3C(=O)NCC3=CC=C(C=C3)C3=C(C)N=CS3)C(C)(C)C)C=C2)=NC=C1Br)C(=O)C1CCC1	CN(CCCNC1=NC(NC2=CC=C(OCCCCOCCOCCOCC(=O)N[C@H](C(=O)N3C[C@H](O)C[C@H]3C(=O)NCC3=CC=C(C=C3)C3=C(C)N=CS3)C(C)(C)C)C=C2)=NC=C1Br)C(=O)C1CCC1	3g	https://www.ncbi.nlm.nih.gov/pubmed/28692295	Yale University	VHL	VH032	TBK1	1065.14	5.58	5	14	33	217.11	2	4	4.18	38.18	14	PEG2 PEG4	4	4
CC(C)(C)[C@@H](C(N1C[C@H](C[C@@H]1C(NCC2=CC=C(C=C2)C3=C(N=CS3)C)=O)O)=O)NC(COCCOCCNC(C4=CC=C(C5=CC([C@H](NC6=CC=C(Cl)C=C6)C[C@H](C)N7C(C)=O)=C7C=C5)C=C4)=O)=O	CC(C)(C)[C@@H](C(N1C[C@H](C[C@@H]1C(NCC2=CC=C(C=C2)C3=C(N=CS3)C)=O)O)=O)NC(COCCOCCNC(C4=CC=C(C5=CC([C@H](NC6=CC=C(Cl)C=C6)C[C@H](C)N7C(C)=O)=C7C=C5)C=C4)=O)=O	MZP-61	https://www.ncbi.nlm.nih.gov/pmc/articles/PMC5788402/	University of Dundee	VHL	VH032	BET	992.63	5.74	5	10	24	191	3	5	4.24	30.24	9	PEG2	4	4
OC1=CC=C2C(SC(C3=CC=C(O)C=C3)=C2C(C4=CC=C(OCCN(CCN5CCN(CCCC(N[C@@H](C(C)(C)C)C(N6[C@H](C(N[C@@H](C)C7=CC=C(C8=C(C)N=CS8)C=C7)=O)C[C@@H](O)C6)=O)=O)CC5)CC)C=C4)=O)=C1	OC1=CC=C2C(SC(C3=CC=C(O)C=C3)=C2C(C4=CC=C(OCCN(CCN5CCN(CCCC(N[C@@H](C(C)(C)C)C(N6[C@H](C(N[C@@H](C)C7=CC=C(C8=C(C)N=CS8)C=C7)=O)C[C@@H](O)C6)=O)=O)CC5)CC)C=C4)=O)=C1	SW 34	https://pubs.acs.org/doi/abs/10.1021/acs.jmedchem.8b01572	Uni Michigan	VHL	VH032	ER	1058.37	6.5	5	12	25	187.58	2	6	5.01	33.01	10	alkyl piperazine	5	4
ClC1=CC=C2C(NC([C@@]23C4(CCCCC4)N[C@@H](C(NC5=CC=C(C(NCCCCCCNC6=CC=CC(C(N7C8C(NC(CC8)=O)=O)=O)=C6C7=O)=O)C=C5)=O)[C@@H]3C9=CC=CC(Cl)=C9F)=O)=C1	ClC1=CC=C2C(NC([C@@]23C4(CCCCC4)N[C@@H](C(NC5=CC=C(C(NCCCCCCNC6=CC=CC(C(N7C8C(NC(CC8)=O)=O)=O)=C6C7=O)=O)C=C5)=O)[C@@H]3C9=CC=CC(Cl)=C9F)=O)=C1	YL 7	https://www.ncbi.nlm.nih.gov/pubmed/30525597/	Uni Michigan	CRBN	Pomalidomide	MDM2	936.863	5.75	6	10	15	194.91	2	4	5.32	21.32	7	alkyl	5	4
FC1=CC=C(NC(C2(C(NC3=CC=C(OC4=C5C=C(OC)C(OCCCOCCCOCCC(N[C@@H](C(C)(C)C)C(N6[C@H](C(NCC7=CC=C(C8=C(C)N=CS8)C=C7)=O)C[C@@H](O)C6)=O)=O)=CC5=NC=C4)C(F)=C3)=O)CC2)=O)C=C1	FC1=CC=C(NC(C2(C(NC3=CC=C(OC4=C5C=C(OC)C(OCCCOCCCOCCC(N[C@@H](C(C)(C)C)C(N6[C@H](C(NCC7=CC=C(C8=C(C)N=CS8)C=C7)=O)C[C@@H](O)C6)=O)=O)=CC5=NC=C4)C(F)=C3)=O)CC2)=O)C=C1	SJF 8240	https://www.ncbi.nlm.nih.gov/pubmed/30631068	Yale University	VHL	VH032	p38	1106.25	6.82	5	15	31	227.81	4	6	5.42	39.42	12	PEG2 PEG3	5	4
CC/C(C1=CC=CC=C1)=C(C2=CC=C(O)C=C2)/C3=CC=C(OCCN(C)C(COCCOCCOCCNC([C@H](C(C4=CC=CC=C4)C5=CC=CC=C5)NC([C@H]6N(C([C@H](C7CCCCC7)NC([C@H](C)NC)=O)=O)CCC6)=O)=O)=O)C=C3	CC/C(C1=CC=CC=C1)=C(C2=CC=C(O)C=C2)/C3=CC=C(OCCN(C)C(COCCOCCOCCNC([C@H](C(C4=CC=CC=C4)C5=CC=CC=C5)NC([C@H]6N(C([C@H](C7CCCCC7)NC([C@H](C)NC)=O)=O)CCC6)=O)=O)=O)C=C3	SNIPER(ER)-19	https://www.ncbi.nlm.nih.gov/pubmed/28154167	National Instutite of Health Sciences	IAP	MV1	ERα	1107.4	7.07	5	11	35	197.1	3	5	6.45	43.45	12	PEG2	5	4
OC1=CC=C2C(SC(C3=CC=C(O)C=C3)=C2C(C4=CC=C(OCCN(CCCCCCCC(N[C@@H](C(C)(C)C)C(N5[C@H](C(NCC6=CC=C(C7=C(C)N=CS7)C=C6)=O)C[C@@H](O)C5)=O)=O)CC)C=C4)=O)=C1	OC1=CC=C2C(SC(C3=CC=C(O)C=C3)=C2C(C4=CC=C(OCCN(CCCCCCCC(N[C@@H](C(C)(C)C)C(N5[C@H](C(NCC6=CC=C(C7=C(C)N=CS7)C=C6)=O)C[C@@H](O)C5)=O)=O)CC)C=C4)=O)=C1	SW 42	https://pubs.acs.org/doi/abs/10.1021/acs.jmedchem.8b01572	Uni Michigan	VHL	VH032	ER	988.272	7.61	5	10	26	181.1	2	6	6.78	35.78	8	alkyl	4	4
OC1=CC=C2C(SC(C3=CC=C(O)C=C3)=C2C(C4=CC=C(OCCN(CC)CCCCCCCC(N[C@@H](C(C)(C)C)C(N5[C@H](C(N[C@@H](C)C6=CC=C(C7CC7)C=C6)=O)C[C@@H](O)C5)=O)=O)C=C4)=O)=C1	OC1=CC=C2C(SC(C3=CC=C(O)C=C3)=C2C(C4=CC=C(OCCN(CC)CCCCCCCC(N[C@@H](C(C)(C)C)C(N5[C@H](C(N[C@@H](C)C6=CC=C(C7CC7)C=C6)=O)C[C@@H](O)C5)=O)=O)C=C4)=O)=C1	SW 46	https://pubs.acs.org/doi/abs/10.1021/acs.jmedchem.8b01572	Uni Michigan	VHL	VH032	ER	945.229	7.88	5	9	26	168.74	2	5	7.55	35.55	8	alkyl	4	4
OC1=CC=C2C(SC(C3=CC=C(O)C=C3)=C2C(C4=CC=C(OCCN(CC)CCCCCCCC(N[C@@H](C(C)(C)C)C(N5[C@H](C(N[C@@H](C)C6=CC=C(C(C)C)C=C6)=O)C[C@@H](O)C5)=O)=O)C=C4)=O)=C1	OC1=CC=C2C(SC(C3=CC=C(O)C=C3)=C2C(C4=CC=C(OCCN(CC)CCCCCCCC(N[C@@H](C(C)(C)C)C(N5[C@H](C(N[C@@H](C)C6=CC=C(C(C)C)C=C6)=O)C[C@@H](O)C5)=O)=O)C=C4)=O)=C1	SW 47	https://pubs.acs.org/doi/abs/10.1021/acs.jmedchem.8b01572	Uni Michigan	VHL	VH032	ER	947.245	8.13	5	9	26	168.74	2	5	8.01	36.01	8	alkyl	4	4
O=C1N(C(CC2)C(NC2=O)=O)C(C3=C1C=CC=C3NCCOCCOCCOCCN4N=NC(C(N5C[C@H](N6N=C(C7=CC=C(OC8=CC=CC=C8)C=C7)C9=C(N)N=CN=C96)CCC5)=O)=C4)=O	O=C1N(C(CC2)C(NC2=O)=O)C(C3=C1C=CC=C3NCCOCCOCCOCCN4N=NC(C(N5C[C@H](N6N=C(C7=CC=C(OC8=CC=CC=C8)C=C7)C9=C(N)N=CN=C96)CCC5)=O)=C4)=O	P13I	https://www.ncbi.nlm.nih.gov/pubmed/29875397/	Tsinghua University	CRBN	Pomalidomide	BTK	912.965	2.78	3	18	20	247.11	0	6	2.93	26.07	14	PEG2, triazole	4	4
FC1=CC=CC(COC2=CC=C(C=C2Cl)NC3=NC=NC4=C3C=C(C=C4)C5=CC=C(C=C5)OCCOCCOCCOCC(N[C@H](C(N6[C@@H](C[C@H](C6)O)C(NCC7=CC=C(C=C7)C8=C(N=CS8)C)=O)=O)C(C)(C)C)=O)=C1	FC1=CC=CC(COC2=CC=C(C=C2Cl)NC3=NC=NC4=C3C=C(C=C4)C5=CC=C(C=C5)OCCOCCOCCOCC(N[C@H](C(N6[C@@H](C[C@H](C6)O)C(NCC7=CC=C(C=C7)C8=C(N=CS8)C)=O)=O)C(C)(C)C)=O)=C1	GB RTK 5	https://www.ncbi.nlm.nih.gov/pubmed/29129716	Yale University	VHL	VH032	EGFR	1074.66	7.65	4	14	28	194	2	7	7.49	39.49	11	PEG2	5	4
O=C(N[C@@H](C(C)(C)C)C(N1[C@@H](C[C@H](C1)O)C(NCC2=CC=C(C=C2)C3=C(N=CS3)C)=O)=O)COCCOCCOCCOC4=CC=C(C=C4)N5C(N(C(C5(C)C)=O)C6=CC(C(F)(F)F)=C(C=C6)C#N)=S	O=C(N[C@@H](C(C)(C)C)C(N1[C@@H](C[C@H](C1)O)C(NCC2=CC=C(C=C2)C3=C(N=CS3)C)=O)=O)COCCOCCOCCOC4=CC=C(C=C4)N5C(N(C(C5(C)C)=O)C6=CC(C(F)(F)F)=C(C=C6)C#N)=S	Enz 2a	https://www.ncbi.nlm.nih.gov/pubmed/30271980/	Yale University	VHL	VH032	AR	1008.14	5.65	3	14	26	195.36	2	4	5.01	32.01	12	PEG2	4	4
COC1=CC(C(C2=C3C=NC=C2)=CN(C)C3=O)=CC(OC)=C1CN4CCN(CCOCCOCCOC5=CC(C6=C(C)N=CS6)=CC=C5CNC([C@@H]7C[C@@H](O)CN7C([C@H](C(C)(C)C)NC(C8(F)CC8)=O)=O)=O)CC4	COC1=CC(C(C2=C3C=NC=C2)=CN(C)C3=O)=CC(OC)=C1CN4CCN(CCOCCOCCOC5=CC(C6=C(C)N=CS6)=CC=C5CNC([C@@H]7C[C@@H](O)CN7C([C@H](C(C)(C)C)NC(C8(F)CC8)=O)=O)=O)CC4	VZ 26	https://www.ncbi.nlm.nih.gov/pubmed/30540463	University of Dundee	VHL	VH101	BRD9	1041.25	4.41	3	15	26	196.4	2	4	1.82	31.18	11	PEG2	4	3.8
CC1=C(C2=CC=C(CNC([C@@H]3C[C@@H](O)CN3C([C@H](C(C)(C)C)NC(CCOCCN4C(S/C(C4=O)=C\C5=CC=C(OC6=C(C(F)(F)F)C=C(C#N)C=C6)C(OC)=C5)=O)=O)=O)=O)C=C2)SC=N1	CC1=C(C2=CC=C(CNC([C@@H]3C[C@@H](O)CN3C([C@H](C(C)(C)C)NC(CCOCCN4C(S/C(C4=O)=C\C5=CC=C(OC6=C(C(F)(F)F)C=C(C#N)C=C6)C(OC)=C5)=O)=O)=O)=O)C=C2)SC=N1	PROTAC_ERRα	https://www.ncbi.nlm.nih.gov/pubmed/26075522	Yale University	VHL	VH032	ERRα	949.03	5.53	3	14	22	199.96	2	4	4.71	27.71	7	PEG2	4	3.8
CN1C=C(C2=CC(OC)=C(OCC(NCCCOCCOCCOCCCNC(COC3=CC=CC(C(N4C5C(NC(CC5)=O)=O)=O)=C3C4=O)=O)=O)C=C2)C(SC(C(NC6CCS(CC6)(=O)=O)=N)=C7)=C7C1=O	CN1C=C(C2=CC(OC)=C(OCC(NCCCOCCOCCOCCCNC(COC3=CC=CC(C(N4C5C(NC(CC5)=O)=O)=O)=C3C4=O)=O)=O)C=C2)C(SC(C(NC6CCS(CC6)(=O)=O)=N)=C7)=C7C1=O	Remillard S1	https://www.ncbi.nlm.nih.gov/pubmed/28418626	Dana-Farber Cancer Institute	CRBN	Thalidomide	BRD9	1036.14	2.34	5	17	28	287.46	2	3	-2.38	36.38	15	PEG2	4	3.66667
CN1C=C(C2=CC(OC)=C(OCC(NCCCCNC(COC3=CC=CC(C(N4C5C(NC(CC5)=O)=O)=O)=C3C4=O)=O)=O)C=C2)C(SC(C(NC6CCS(CC6)(=O)=O)=N)=C7)=C7C1=O	CN1C=C(C2=CC(OC)=C(OCC(NCCCCNC(COC3=CC=CC(C(N4C5C(NC(CC5)=O)=O)=O)=C3C4=O)=O)=O)C=C2)C(SC(C(NC6CCS(CC6)(=O)=O)=N)=C7)=C7C1=O	Remillard 1	https://www.ncbi.nlm.nih.gov/pubmed/28418626	Dana-Farber Cancer Institute	CRBN	Thalidomide	BRD9	903.979	2.16	5	14	19	259.77	2	3	-1.78	26.78	6	Alkyl	4	3.66667
OC(/C=C(C)/C=C/C=C(C)/C=C/C1=C(C)/C(CCC1(C)C)=N\OCC(NCCOCCOCCNC([C@@H](NC([C@@H](O)[C@@H](N)CC2=CC=CC=C2)=O)CC(C)C)=O)=O)=O	OC(/C=C(C)/C=C/C=C(C)/C=C/C1=C(C)/C(CCC1(C)C)=N\OCC(NCCOCCOCCNC([C@@H](NC([C@@H](O)[C@@H](N)CC2=CC=CC=C2)=O)CC(C)C)=O)=O)=O	SNIPER(CRABP)-4	https://www.ncbi.nlm.nih.gov/pubmed/27965304	National Instutite of Health Sciences	IAP	Bestatin	CRABP	808.03	4.27	6	10	28	210.9	3	1	0.31	31.69	10	PEG2	4	3.66667
O=C(N1C2C(NC(CC2)=O)=O)C3=CC=CC(NCCN4C=C(C#CC5=C(CC6=CC=CC=C6)C(COCC7=NN=C(C)N78)=C8S5)C=N4)=C3C1=O	O=C(N1C2C(NC(CC2)=O)=O)C3=CC=CC(NCCN4C=C(C#CC5=C(CC6=CC=CC=C6)C(COCC7=NN=C(C)N78)=C8S5)C=N4)=C3C1=O	28	https://pubs.acs.org/doi/10.1021/acs.jmedchem.8b00506	University of Michigan	CRBN	Pomalidomide	BET	686.747	3.18	2	11	9	148.37	0	5	1.73	15.27	3	Alkyl	3	3.66667
OC(/C=C(C)/C=C/C=C(C)/C=C/C1=C(C)/C(CCC1(C)C)=N\OCC(NCCOCCOCCNC([C@@H](C(C2=CC=CC=C2)C3=CC=CC=C3)NC([C@H]4CCCN4C([C@H](NC([C@H](C)NC)=O)C5CCCCC5)=O)=O)=O)=O)=O	OC(/C=C(C)/C=C/C=C(C)/C=C/C1=C(C)/C(CCC1(C)C)=N\OCC(NCCOCCOCCNC([C@@H](C(C2=CC=CC=C2)C3=CC=CC=C3)NC([C@H]4CCCN4C([C@H](NC([C@H](C)NC)=O)C5CCCCC5)=O)=O)=O)=O)=O	SNIPER(CRABP)-11	https://www.ncbi.nlm.nih.gov/pubmed/27965304	National Instutite of Health Sciences	IAP	MV1	CRABP	1062.36	6.15	6	11	33	226.09	3	2	2.34	35.66	10	PEG2	6	3.66667
O=C(COCCOCCOCC(N[C@@H](C(N1[C@H](C(NCC2=CC=C(C3=C(C)N=CS3)C=C2)=O)C[C@@H](O)C1)=O)C(C)(C)C)=O)NC4=NC5=C(N=C(C6=CC(C(NC7=CC(C(F)(F)F)=C(CN8CCN(CC)CC8)C=C7)=O)=CC=C6)C=C5)S4	O=C(COCCOCCOCC(N[C@@H](C(N1[C@H](C(NCC2=CC=C(C3=C(C)N=CS3)C=C2)=O)C[C@@H](O)C1)=O)C(C)(C)C)=O)NC4=NC5=C(N=C(C6=CC(C(NC7=CC(C(F)(F)F)=C(CN8CCN(CC)CC8)C=C7)=O)=CC=C6)C=C5)S4	HG-VHL	https://www.ncbi.nlm.nih.gov/pubmed/30202081/	National Instutite of Health Sciences	VHL	VH032	BCR-ABL	1157.34	5.72	5	17	30	228.19	4	6	4.49	37.49	11	PEG2	4	3.66667
O=C([C@@H]1C[C@@H](O)CN1C([C@@H](C2=CC(C)=NO2)C(C)C)=O)N[C@@H](CC(N(CC3)CCC3N(CC4)CCC4C#CC(C=C5)=CC=C5CC(C(C)=N6)=C(C)N6C7=CC=C(C#N)C(Cl)=C7)=O)C8=CC=C(C9=C(C)N=CS9)C=C8	O=C([C@@H]1C[C@@H](O)CN1C([C@@H](C2=CC(C)=NO2)C(C)C)=O)N[C@@H](CC(N(CC3)CCC3N(CC4)CCC4C#CC(C=C5)=CC=C5CC(C(C)=N6)=C(C)N6C7=CC=C(C#N)C(Cl)=C7)=O)C8=CC=C(C9=C(C)N=CS9)C=C8	WS 33	https://www.ncbi.nlm.nih.gov/pubmed/?term=30629437	Uni Michigan	VHL	VH032	AR	1034.72	7.51	2	11	19	166.53	1	6	4.64	26.64	10	alkyne piperidine piperidine	5	3.66667
O=C(N(C1=O)C2CCC(NC2=O)=O)C3=C1C=CC=C3NCCOCCOCCOCCOCCC(N(C)[C@@H]4CC(CC[C@]5([H])C6CC[C@@]7([H])[C@@]5([H])CC[C@@H]7C8=CC(C=NC=C9)=C9C=C8)[C@]6(C)CC4)=O	O=C(N(C1=O)C2CCC(NC2=O)=O)C3=C1C=CC=C3NCCOCCOCCOCCOCCC(N(C)[C@@H]4CC(CC[C@]5([H])C6CC[C@@]7([H])[C@@]5([H])CC[C@@H]7C8=CC(C=NC=C9)=C9C=C8)[C@]6(C)CC4)=O	JH-XI-10-02	https://www.ncbi.nlm.nih.gov/pubmed/29937979/	Dana-Farber Cancer Institute	CRBN	Pomalidomide	CDK8	906.134	5.75	2	11	20	165.17	0	3	5.15	25.15	15	PEG2	5	3.66667
C[C@H](C(N[C@@H](C(N1[C@H](CCC1)C2=NC(C(C3=CC(OCCOCCOCCNC(C4CCN(C5=NC=C(C(NC6=CC=C(OC(F)(Cl)F)C=C6)=O)C=C5C7=CC=NN7)C4)=O)=CC=C3)=O)=CS2)=O)C8CCCCC8)=O)NC	C[C@H](C(N[C@@H](C(N1[C@H](CCC1)C2=NC(C(C3=CC(OCCOCCOCCNC(C4CCN(C5=NC=C(C(NC6=CC=C(OC(F)(Cl)F)C=C6)=O)C=C5C7=CC=NN7)C4)=O)=CC=C3)=O)=CS2)=O)C8CCCCC8)=O)NC	SNIPER(ABL)-062	https://www.ncbi.nlm.nih.gov/pubmed/29057048	National Instutite of Health Sciences	IAP	LCL161	BCR-ABL	1089.65	5.3	5	17	29	225.98	3	5	5.33	36.33	10	PEG2	5	3.66667
S=C1N(C2=CC=C(C#CC3=CC=C(N4CCN(CCCNC(C[C@H](NC([C@@H]5C[C@@H](O)CN5C([C@@H](C6=CC(C)=NO6)C(C)C)=O)=O)C7=CC=C(C8=C(C)N=CS8)C=C7)=O)CC4)N=C3)C=C2)C(C)(C)C(N1C9=CC=C(C#N)C(C(F)(F)F)=C9)=O	S=C1N(C2=CC=C(C#CC3=CC=C(N4CCN(CCCNC(C[C@H](NC([C@@H]5C[C@@H](O)CN5C([C@@H](C6=CC(C)=NO6)C(C)C)=O)=O)C7=CC=C(C8=C(C)N=CS8)C=C7)=O)CC4)N=C3)C=C2)C(C)(C)C(N1C9=CC=C(C#N)C(C(F)(F)F)=C9)=O	WS 27	https://www.ncbi.nlm.nih.gov/pubmed/?term=30629437	Uni Michigan	VHL	Based on VH032	AR	1154.34	7.05	3	15	23	198.87	2	6	6.57	32.57	13	alkyne pyrizine piperidine	5	3.66667
S=C1N(C2=CC=C(C#CC3=CC=C(N4CCN(C(C[C@H](NC([C@@H]5C[C@@H](O)CN5C([C@@H](C6=CC(C)=NO6)C(C)C)=O)=O)C7=CC=C(C8=C(C)N=CS8)C=C7)=O)CC4)N=C3)C=C2)C(C)(C)C(N1C9=CC=C(C#N)C(C(F)(F)F)=C9)=O	S=C1N(C2=CC=C(C#CC3=CC=C(N4CCN(C(C[C@H](NC([C@@H]5C[C@@H](O)CN5C([C@@H](C6=CC(C)=NO6)C(C)C)=O)=O)C7=CC=C(C8=C(C)N=CS8)C=C7)=O)CC4)N=C3)C=C2)C(C)(C)C(N1C9=CC=C(C#N)C(C(F)(F)F)=C9)=O	WS 28	https://www.ncbi.nlm.nih.gov/pubmed/?term=30629437	Uni Michigan	VHL	Based on VH032	AR	1097.25	6.98	2	14	19	186.84	1	6	7.08	29.08	10	alkyne pyrizine piperidine	5	3.66667
S=C1N(C2=CC=C(C#CC3=CC=C(N4CCN(CCCC(N[C@@H](C(C)(C)C)C(N5C[C@H](O)CC5C(N[C@@H](C)C6=CC=C(C7=C(C)N=CS7)C=C6)=O)=O)=O)CC4)N=C3)C=C2)C(C)(C)C(N1C8=CC=C(C#N)C(C(F)(F)F)=C8)=O	S=C1N(C2=CC=C(C#CC3=CC=C(N4CCN(CCCC(N[C@@H](C(C)(C)C)C(N5C[C@H](O)CC5C(N[C@@H](C)C6=CC=C(C7=C(C)N=CS7)C=C6)=O)=O)=O)CC4)N=C3)C=C2)C(C)(C)C(N1C8=CC=C(C#N)C(C(F)(F)F)=C8)=O	WS 21	https://www.ncbi.nlm.nih.gov/pubmed/?term=30629437	Uni Michigan	VHL	Based on VH032	AR	1087.3	6.97	3	13	21	177.28	2	5	7.15	30.15	13	alkyne pyridine piperazine	5	3.66667
S=C1N(C2=CC(F)=C(C(NCCCCCCCCCNC(C[C@H](NC([C@@H]3C[C@@H](O)CN3C([C@@H](C4=CC(C)=NO4)C(C)C)=O)=O)C5=CC=C(C6=C(C)N=CS6)C=C5)=O)=O)C=C2)C(C)(C)C(N1C7=CC=C(C#N)C(C(F)(F)F)=C7)=O	S=C1N(C2=CC(F)=C(C(NCCCCCCCCCNC(C[C@H](NC([C@@H]3C[C@@H](O)CN3C([C@@H](C4=CC(C)=NO4)C(C)C)=O)=O)C5=CC=C(C6=C(C)N=CS6)C=C5)=O)=O)C=C2)C(C)(C)C(N1C7=CC=C(C#N)C(C(F)(F)F)=C7)=O	WS 26	https://www.ncbi.nlm.nih.gov/pubmed/?term=30629437	Uni Michigan	VHL	Based on VH032	AR	1114.29	7.95	4	14	28	209.13	2	5	7.44	37.44	11	alkyl	5	3.66667
ClC1=CC(O[C@H]2C(C)(C)[C@H](NC(C3=CC=C(C(NCCCCCCCCCNC(C[C@H](NC([C@@H]4C[C@@H](O)CN4C([C@@H](C5=CC(C)=NO5)C(C)C)=O)=O)C6=CC=C(C7=C(C)N=CS7)C=C6)=O)=O)C=C3)=O)C2(C)C)=CC=C1C#N	ClC1=CC(O[C@H]2C(C)(C)[C@H](NC(C3=CC=C(C(NCCCCCCCCCNC(C[C@H](NC([C@@H]4C[C@@H](O)CN4C([C@@H](C5=CC(C)=NO5)C(C)C)=O)=O)C6=CC=C(C7=C(C)N=CS7)C=C6)=O)=O)C=C3)=O)C2(C)C)=CC=C1C#N	WS 39	https://www.ncbi.nlm.nih.gov/pubmed/?term=30629437	Uni Michigan	VHL	Based on VH032	AR	1089.79	8.2	5	11	30	223.91	4	5	7.52	39.52	11	alkyl	5	3.66667
S=C1N(C2=CC=C(C#CC3=CC=C(N4CCN(CCCCC(N[C@@H](C(C)(C)C)C(N5C[C@H](O)CC5C(N[C@@H](C)C6=CC=C(C7=C(C)N=CS7)C=C6)=O)=O)=O)CC4)N=C3)C=C2)C(C)(C)C(N1C8=CC=C(C#N)C(C(F)(F)F)=C8)=O	S=C1N(C2=CC=C(C#CC3=CC=C(N4CCN(CCCCC(N[C@@H](C(C)(C)C)C(N5C[C@H](O)CC5C(N[C@@H](C)C6=CC=C(C7=C(C)N=CS7)C=C6)=O)=O)=O)CC4)N=C3)C=C2)C(C)(C)C(N1C8=CC=C(C#N)C(C(F)(F)F)=C8)=O	WS 22	https://www.ncbi.nlm.nih.gov/pubmed/?term=30629437	Uni Michigan	VHL	Based on VH032	AR	1101.32	7.35	3	13	22	177.28	2	5	7.69	31.69	14	alkyne pyridine piperazine	5	3.66667
S=C1N(C2=CC=C(C#CC3=CC=C(CCCCCCC(N[C@@H](C(C)(C)C)C(N4C[C@H](O)CC4C(NCC5=CC=C(C6=C(C)N=CS6)C=C5)=O)=O)=O)N=C3)C=C2)C(C)(C)C(N1C7=CC=C(C#N)C(C(F)(F)F)=C7)=O	S=C1N(C2=CC=C(C#CC3=CC=C(CCCCCCC(N[C@@H](C(C)(C)C)C(N4C[C@H](O)CC4C(NCC5=CC=C(C6=C(C)N=CS6)C=C5)=O)=O)=O)N=C3)C=C2)C(C)(C)C(N1C7=CC=C(C#N)C(C(F)(F)F)=C7)=O	WS 19	https://www.ncbi.nlm.nih.gov/pubmed/?term=30629437	Uni Michigan	VHL	VH032	AR	1031.23	8.12	3	11	23	170.8	2	5	8.47	33.47	12	alkyne pyridine alkyl	5	3.66667
O=C([C@H]1N(C([C@@H](NC(C2(F)CC2)=O)C(C)(C)C)=O)C[C@H](O)C1)NCC3=CC=C(C4=C(C)N=CS4)C=C3OCCOCCOCCOCCOCCOCC(NCCNC5=CC=CC(C(N6C(CC7)C(NC7=O)=O)=O)=C5C6=O)=O	O=C([C@H]1N(C([C@@H](NC(C2(F)CC2)=O)C(C)(C)C)=O)C[C@H](O)C1)NCC3=CC=C(C4=C(C)N=CS4)C=C3OCCOCCOCCOCCOCCOCC(NCCNC5=CC=CC(C(N6C(CC7)C(NC7=O)=O)=O)=C5C6=O)=O	GMMC 18b	https://www.ncbi.nlm.nih.gov/pubmed/30826187/	Uni Dundee	VHL	VH032	CRBN	1109.23	2.57	6	18	35	291.16	3	3	-0.1	41.1	20	PEG2 amide	5	3.66667
O=C1N(C(CC2)C(NC2=O)=O)C(C3=C1C=CC=C3NCCOCCOCCN4N=NC(CCCC(N5C[C@H](N6C7=NC=NC(N)=C7C(C8=CC=C(C=C8)OC9=CC=CC=C9)=N6)CCC5)=O)=C4)=O	O=C1N(C(CC2)C(NC2=O)=O)C(C3=C1C=CC=C3NCCOCCOCCN4N=NC(CCCC(N5C[C@H](N6C7=NC=NC(N)=C7C(C8=CC=C(C=C8)OC9=CC=CC=C9)=N6)CCC5)=O)=C4)=O	P13IS	https://www.ncbi.nlm.nih.gov/pubmed/30729032	Tsinghua University	CRBN	Pomalidomide	BTK	910.993	3.17	3	17	20	237.88	0	6	3.33	26.33	14	alkyl, triazole, PEG2	4	3.66667
O=C1NC(N)=NC2=C1[N+](CC3=CC=C(F)C=C3)=CN2[C@H]4O[C@@H](COP(O)(OP(O)(NCCOCCOCCOCCC(NC5=CC=CC6=C5CN(C(CC7)C(NC7=O)=O)C6=O)=O)=O)=O)[C@H](O)[C@@H]4O	O=C1NC(N)=NC2=C1[N+](CC3=CC=C(F)C=C3)=CN2[C@H]4O[C@@H](COP(O)(OP(O)(NCCOCCOCCOCCC(NC5=CC=CC6=C5CN(C(CC7)C(NC7=O)=O)C6=O)=O)=O)=O)[C@H](O)[C@@H]4O	TKAM 24b	https://www.ncbi.nlm.nih.gov/pubmed/30735900/	Uni Michigan	CRBN	Lenalidomide	elF4E	996.812	-2.44	9	17	24	351.78	1	3	-10.68	40.68	11	PEG3	5	3.66667
O=C(NCCNC1=CC=CC(C(N2C(CC3)C(NC3=O)=O)=O)=C1C2=O)COCCCCCOCCOCCCCCOCC(N[C@@H](C(C)(C)C)C(N4[C@H](C(NCC5=CC=C(C6=C(C)N=CS6)C=C5)=O)C[C@@H](O)C4)=O)=O	O=C(NCCNC1=CC=CC(C(N2C(CC3)C(NC3=O)=O)=O)=C1C2=O)COCCCCCOCCOCCCCCOCC(N[C@@H](C(C)(C)C)C(N4[C@H](C(NCC5=CC=C(C6=C(C)N=CS6)C=C5)=O)C[C@@H](O)C4)=O)=O	GMMC 14a	https://www.ncbi.nlm.nih.gov/pubmed/30826187/	Uni Dundee	VHL	VH032	CRBN	1061.26	3.49	6	15	35	272.7	3	3	1.26	39.74	23	PEG2 PEG5 amide	5	3.6
CC1=C(SC=N1)C2=CC=C(CNC([C@@H]3C[C@@H](O)CN3C([C@H](C(C)(C)C)NC(C4(F)CC4)=O)=O)=O)C(OCCOCCOCCOCC(NC5CN(CC6=CC(OC)=C(C(C7=C8C=NC=C7)=CN(C)C8=O)C=C6OC)C5)=O)=C2	CC1=C(SC=N1)C2=CC=C(CNC([C@@H]3C[C@@H](O)CN3C([C@H](C(C)(C)C)NC(C4(F)CC4)=O)=O)=O)C(OCCOCCOCCOCC(NC5CN(CC6=CC(OC)=C(C(C7=C8C=NC=C7)=CN(C)C8=O)C=C6OC)C5)=O)=C2	VZ 60	https://www.ncbi.nlm.nih.gov/pubmed/30540463	University of Dundee	VHL	VH101	BRD9	1085.26	4.04	4	16	30	231.49	3	4	1.13	35.87	14	PEG2	4	3.5
CN(CCCNC1=NC(NC2=CC=C(OCCOCCOCCOCCOCC(=O)N[C@H](C(=O)N3C[C@H](O)C[C@H]3C(=O)NCC3=CC=C(C=C3)C3=C(C)N=CS3)C(C)(C)C)C=C2)=NC=C1Br)C(=O)C1CCC1	CN(CCCNC1=NC(NC2=CC=C(OCCOCCOCCOCCOCC(=O)N[C@H](C(=O)N3C[C@H](O)C[C@H]3C(=O)NCC3=CC=C(C=C3)C3=C(C)N=CS3)C(C)(C)C)C=C2)=NC=C1Br)C(=O)C1CCC1	3h	https://www.ncbi.nlm.nih.gov/pubmed/28692295	Yale University	VHL	VH032	TBK1	1081.14	5.08	5	15	34	226.34	2	4	3.56	38.56	15	PEG2	4	3.5
CC1=C(C2=CC=C(CNC([C@@H]3C[C@@H](O)CN3C([C@@H](NC(CCOCCCOCCCOC4=C(OC)C(N=CC=C5OC6=C(F)C=C(NC(C7(CC7)C(NC8=CC=C(F)C=C8)=O)=O)C=C6)=C5C=C4)=O)C(C)(C)C)=O)=O)C=C2)SC=N1	CC1=C(C2=CC=C(CNC([C@@H]3C[C@@H](O)CN3C([C@@H](NC(CCOCCCOCCCOC4=C(OC)C(N=CC=C5OC6=C(F)C=C(NC(C7(CC7)C(NC8=CC=C(F)C=C8)=O)=O)C=C6)=C5C=C4)=O)C(C)(C)C)=O)=O)C=C2)SC=N1	Compound 1	https://www.ncbi.nlm.nih.gov/pubmed/29129718	Yale University	VHL	VH032	Multi-kinase	1106.25	6.93	5	15	31	227.81	4	6	5.43	#N/A	12	PEG3	5	3.4
O=C([C@H]1N(C([C@H](C(C)(C)C)NC(COCCOCCOCC(NCCNC2=CC=CC(C(N3C(CC4)C(NC4=O)=O)=O)=C2C3=O)=O)=O)=O)C[C@H](O)C1)NCC5=CC=C(C6=C(C)N=CS6)C=C5	O=C([C@H]1N(C([C@H](C(C)(C)C)NC(COCCOCCOCC(NCCNC2=CC=CC(C(N3C(CC4)C(NC4=O)=O)=O)=C2C3=O)=O)=O)=O)C[C@H](O)C1)NCC5=CC=C(C6=C(C)N=CS6)C=C5	GMMC 7a	https://www.ncbi.nlm.nih.gov/pubmed/30826187/	Uni Dundee	VHL	VH032	CRBN	933.047	1.53	6	14	26	263.47	3	3	-0.74	32.74	14	PEG2 Amide	5	3.33333
CN1C=C(C2=CC(OC)=C(CN(C)CC(NCCCCCCCCNC(COC3=CC=CC4=C3C(N(C5C(NC(CC5)=O)=O)C4=O)=O)=O)=O)C(OC)=C2)C(C=CN=C6)=C6C1=O	CN1C=C(C2=CC(OC)=C(CN(C)CC(NCCCCCCCCNC(COC3=CC=CC4=C3C(N(C5C(NC(CC5)=O)=O)C4=O)=O)=O)=O)C(OC)=C2)C(C=CN=C6)=C6C1=O	Remillard S9	https://www.ncbi.nlm.nih.gov/pubmed/28418626	Dana-Farber Cancer Institute	CRBN	Thalidomide	BRD9	837.931	2.86	3	12	22	205.35	2	3	1.21	26.79	12	Alkyl	4	3.33333
CC(C)(C1=CC(NC(NC2=CC=C(C=C2)C3=CN4C(SC5=C4C=CC(OCCN6CCN(CCOCCOCCNC(CNC7=C(C8=CC=C7)C(N(C8=O)C9CCC(NC9=O)=O)=O)=O)CC6)=C5)=N3)=O)=NO1)C	CC(C)(C1=CC(NC(NC2=CC=C(C=C2)C3=CN4C(SC5=C4C=CC(OCCN6CCN(CCOCCOCCNC(CNC7=C(C8=CC=C7)C(N(C8=O)C9CCC(NC9=O)=O)=O)=O)CC6)=C5)=N3)=O)=NO1)C	TL13-117	https://www.ncbi.nlm.nih.gov/pubmed/29129717	Dana-Farber Cancer Institute	CRBN	Pomalidomide	FLT3	1004.13	3.69	5	16	24	237.17	1	6	3.3	30.3	17	PEG2 Piperazine	4	3.33333
CN(CCCNC1=NC(NC2=CC=C(OCCCOCCCCOCCCOCC(=O)N[C@H](C(=O)N3C[C@H](O)C[C@H]3C(=O)NCC3=CC=C(C=C3)C3=C(C)N=CS3)C(C)(C)C)C=C2)=NC=C1F)C(=O)C1CCC1	CN(CCCNC1=NC(NC2=CC=C(OCCCOCCCCOCCCOCC(=O)N[C@H](C(=O)N3C[C@H](O)C[C@H]3C(=O)NCC3=CC=C(C=C3)C3=C(C)N=CS3)C(C)(C)C)C=C2)=NC=C1F)C(=O)C1CCC1	5b	https://www.ncbi.nlm.nih.gov/pubmed/28692295	Yale University	VHL	VH032	TBK1	1032.29	5.82	5	15	35	217.11	2	4	3.68	39.68	16	PEG4 PEG3	4	3.33333
CCC[C@H](NC(=O)COCCCOCCCCOCCCOC1=CC=C(NC2=NC=C(Br)C(NCCCN(C)C(=O)C3CCC3)=N2)C=C1)C(=O)N1C[C@H](O)C[C@H]1C(=O)NCC1=CC=C(C=C1)C1=C(C)N=CS1	CCC[C@H](NC(=O)COCCCOCCCCOCCCOC1=CC=C(NC2=NC=C(Br)C(NCCCN(C)C(=O)C3CCC3)=N2)C=C1)C(=O)N1C[C@H](O)C[C@H]1C(=O)NCC1=CC=C(C=C1)C1=C(C)N=CS1	6d	https://www.ncbi.nlm.nih.gov/pubmed/28692295	Yale University	VHL	Based on VH032	TBK1	1079.17	5.82	5	14	36	217.11	2	4	4	41	16	PEG3	5	3.33333
CC(C1=CC(NC(NC2=CC=C(C3=CN4C(SC5=C4C=CC(OCCOCCOCCOCCNC(CNC6=C(C(N(C7CCC(NC7=O)=O)C8=O)=O)C8=CC=C6)=O)=C5)=N3)C=C2)=O)=NO1)(C)C	CC(C1=CC(NC(NC2=CC=C(C3=CN4C(SC5=C4C=CC(OCCOCCOCCOCCNC(CNC6=C(C(N(C7CCC(NC7=O)=O)C8=O)=O)C8=CC=C6)=O)=C5)=N3)C=C2)=O)=NO1)(C)C	TL13-149	https://www.ncbi.nlm.nih.gov/pubmed/29129717	Dana-Farber Cancer Institute	CRBN	Pomalidomide	FLT3	936.01	4.05	5	15	24	239.92	1	6	4.01	31.01	14	PEG2	4	3.33333
CCC1=C(NCCCN(C)C(=O)C2CCC2)N=C(NC2=CC=C(OCCCOCCCCOCCCOCC(=O)N[C@H](C(=O)N3C[C@H](O)C[C@H]3C(=O)NCC3=CC=C(C=C3)C3=C(C)N=CS3)C(C)(C)C)C=C2)N=C1	CCC1=C(NCCCN(C)C(=O)C2CCC2)N=C(NC2=CC=C(OCCCOCCCCOCCCOCC(=O)N[C@H](C(=O)N3C[C@H](O)C[C@H]3C(=O)NCC3=CC=C(C=C3)C3=C(C)N=CS3)C(C)(C)C)C=C2)N=C1	5g	https://www.ncbi.nlm.nih.gov/pubmed/28692295	Yale University	VHL	VH032	TBK1	1042.35	6.28	5	14	36	217.11	2	4	4.48	41.48	16	PEG4 PEG3	5	3.33333
CN[C@@H](C)C(=O)N[C@@H](C1CCCCC1)C(=O)N1CCC[C@H]1C1=NC(=CS1)C(=O)C1=CC(OCCOCCOCCNC(=O)C2=CC=C(CN3C(C)=C(C#N)C(=C3C)C3=CC=C(C=C3)C#N)C=C2)=CC=C1	CN[C@@H](C)C(=O)N[C@@H](C1CCCCC1)C(=O)N1CCC[C@H]1C1=NC(=CS1)C(=O)C1=CC(OCCOCCOCCNC(=O)C2=CC=C(CN3C(C)=C(C#N)C(=C3C)C3=CC=C(C=C3)C#N)C=C2)=CC=C1	SNIPER(AR)-31	https://www.ncbi.nlm.nih.gov/pubmed/28594553	National Instutite of Health Sciences	IAP	LCL161	AR	967.199	5.97	3	12	27	198.48	2	5	5.82	34.82	10	PEG2	5	3.33333
O=C(N)C1=CC=CC2=CN(C3=CC=C(C4=CN(CCOCCOCCOCCOCCNC(CN5CCN(C(N6C(C7=CC=C(Cl)C=C7)C(C8=CC=C(Cl)C=C8)N=C6C9=C(OC(C)C)C=C(OC)C=C9)=O)CC5=O)=O)N=N4)C=C3)N=C21	O=C(N)C1=CC=CC2=CN(C3=CC=C(C4=CN(CCOCCOCCOCCOCCNC(CN5CCN(C(N6C(C7=CC=C(Cl)C=C7)C(C8=CC=C(Cl)C=C8)N=C6C9=C(OC(C)C)C=C(OC)C=C9)=O)CC5=O)=O)N=N4)C=C3)N=C21	ZQ 3	https://www.ncbi.nlm.nih.gov/pubmed/?term=30540295	Tsinghua University	MDM2	Nutlin-3a	PARP1	1145.11	5.27	2	16	29	227.35	1	7	6.3	39.3	17	PEG2	5	3.33333
CN[C@H](C(N[C@H](C(N1CCC[C@H]1C2=NC(C(C3=CC(OCCOCCOCCOCCOC4=CC=C(C=C4)CN5C(C)=C(C(C6=CC=C(C#N)C=C6)=C5C)C#N)=CC=C3)=O)=CS2)=O)C7CCCCC7)=O)C	CN[C@H](C(N[C@H](C(N1CCC[C@H]1C2=NC(C(C3=CC(OCCOCCOCCOCCOC4=CC=C(C=C4)CN5C(C)=C(C(C6=CC=C(C#N)C=C6)=C5C)C#N)=CC=C3)=O)=CS2)=O)C7CCCCC7)=O)C	SNIPER(AR)-51	https://www.ncbi.nlm.nih.gov/pubmed/28594553	National Instutite of Health Sciences	IAP	LCL161	AR	984.226	6.59	2	13	29	187.84	1	5	6.54	37.54	12	PEG2	5	3.33333
CN[C@@H](C)C(=O)N[C@@H](C1CCCCC1)C(=O)N1CCC[C@H]1C1=NC(=CS1)C(=O)C1=CC(OCCOCCOCCOC2=CC=C(CN3C(C)=C(C#N)C(=C3C)C3=CC=C(C=C3)C#N)C=C2)=CC=C1	CN[C@@H](C)C(=O)N[C@@H](C1CCCCC1)C(=O)N1CCC[C@H]1C1=NC(=CS1)C(=O)C1=CC(OCCOCCOCCOC2=CC=C(CN3C(C)=C(C#N)C(=C3C)C3=CC=C(C=C3)C#N)C=C2)=CC=C1	SNIPER(AR)-52	https://www.ncbi.nlm.nih.gov/pubmed/28594553	National Instutite of Health Sciences	IAP	LCL161	AR	940.173	6.64	2	12	26	178.61	1	5	6.59	34.59	9	PEG2	5	3.33333
C[C@H](NC)C(N[C@@H](C1CCCCC1)C(N2[C@H](C3=NC(C(C4=CC=C(OCCOCCOCCNC(C5=CC(C6=NC=NC(NC7=CC=C(OC(Cl)(F)F)C=C7)=C6)=CC=C5)=O)C=C4)=O)=CS3)CCC2)=O)=O	C[C@H](NC)C(N[C@@H](C1CCCCC1)C(N2[C@H](C3=NC(C(C4=CC=C(OCCOCCOCCNC(C5=CC(C6=NC=NC(NC7=CC=C(OC(Cl)(F)F)C=C7)=C6)=CC=C5)=O)C=C4)=O)=CS3)CCC2)=O)=O	SNIPER(ABL)-021	https://www.ncbi.nlm.nih.gov/pubmed/29057048	National Instutite of Health Sciences	IAP	LCL161	BCR-ABL	1003.56	6.34	4	15	27	193.64	2	5	6.9	35.9	10	PEG2	5	3.33333
CN[C@@H](C)C(=O)N[C@@H](C1CCCCC1)C(=O)N1CCC[C@H]1C1=NC(=CS1)C(=O)C1=CC=CC(OCCOCCOCCOCC#CC2=CC=C(CN3C(C)=C(C#N)C(=C3C)C3=CC=C(C=C3)C#N)C=C2)=C1	CN[C@@H](C)C(=O)N[C@@H](C1CCCCC1)C(=O)N1CCC[C@H]1C1=NC(=CS1)C(=O)C1=CC=CC(OCCOCCOCCOCC#CC2=CC=C(CN3C(C)=C(C#N)C(=C3C)C3=CC=C(C=C3)C#N)C=C2)=C1	SNIPER(AR)-60	https://www.ncbi.nlm.nih.gov/pubmed/28594553	National Instutite of Health Sciences	IAP	LCL161	AR	978.222	6.89	2	12	28	178.61	1	5	7.1	37.1	12	PEG2	5	3.33333
CN(CCCNC1=NC(NC2=CC=C(OCCCCCOCCCCOCCCCOCCCCOCCCCCOCC(=O)N[C@H](C(=O)N3C[C@H](O)C[C@H]3C(=O)NCC3=CC=C(C=C3)C3=C(C)N=CS3)C(C)(C)C)C=C2)=NC=C1Br)C(=O)C1CCC1	CN(CCCNC1=NC(NC2=CC=C(OCCCCCOCCCCOCCCCOCCCCOCCCCCOCC(=O)N[C@H](C(=O)N3C[C@H](O)C[C@H]3C(=O)NCC3=CC=C(C=C3)C3=C(C)N=CS3)C(C)(C)C)C=C2)=NC=C1Br)C(=O)C1CCC1	3p	https://www.ncbi.nlm.nih.gov/pubmed/28692295	Yale University	VHL	VH032	TBK1	1293.52	8.71	5	16	49	235.57	2	4	7.29	57.29	30	PEG4 PEG5	5	3.33333
CN[C@@H](C)C(=O)N[C@@H](C1CCCCC1)C(=O)N1CCC[C@H]1C1=NC(=CS1)C(=O)C1=CC=CC(OCCOCCOCCOCCCC2=CC=C(CN3C(C)=C(C#N)C(=C3C)C3=CC=C(C=C3)C#N)C=C2)=C1	CN[C@@H](C)C(=O)N[C@@H](C1CCCCC1)C(=O)N1CCC[C@H]1C1=NC(=CS1)C(=O)C1=CC=CC(OCCOCCOCCOCCCC2=CC=C(CN3C(C)=C(C#N)C(=C3C)C3=CC=C(C=C3)C#N)C=C2)=C1	SNIPER(AR)-70	https://www.ncbi.nlm.nih.gov/pubmed/28594553	National Instutite of Health Sciences	IAP	LCL161	AR	982.254	7.13	2	12	29	178.61	1	5	7.35	38.35	12	PEG2	5	3.33333
O=C([C@H]1N(C([C@H](C(C)(C)C)NC(COCCCCCCOCC(NCCNC2=CC=CC(C(N3C(CC4)C(NC4=O)=O)=O)=C2C3=O)=O)=O)=O)C[C@H](O)C1)NCC5=CC=C(C6=C(C)N=CS6)C=C5	O=C([C@H]1N(C([C@H](C(C)(C)C)NC(COCCCCCCOCC(NCCNC2=CC=CC(C(N3C(CC4)C(NC4=O)=O)=O)=C2C3=O)=O)=O)=O)C[C@H](O)C1)NCC5=CC=C(C6=C(C)N=CS6)C=C5	GMMC 14b	https://www.ncbi.nlm.nih.gov/pubmed/30826187/	Uni Dundee	VHL	VH032	CRBN	945.102	2.75	6	13	27	254.24	3	3	0.78	32.22	15	alkyl amide	5	3.33333
O=C(NCCNC1=CC=CC(C(N2C(CC3)C(NC3=O)=O)=O)=C1C2=O)COCCOCCOCCOCCOCCOCC(N[C@@H](C(C)(C)C)C(N4[C@H](C(NCC5=CC=C(C6=C(C)N=CS6)C=C5)=O)C[C@@H](O)C4)=O)=O	O=C(NCCNC1=CC=CC(C(N2C(CC3)C(NC3=O)=O)=O)=C1C2=O)COCCOCCOCCOCCOCCOCC(N[C@@H](C(C)(C)C)C(N4[C@H](C(NCC5=CC=C(C6=C(C)N=CS6)C=C5)=O)C[C@@H](O)C4)=O)=O	GMMC 14c	https://www.ncbi.nlm.nih.gov/pubmed/30826187/	Uni Dundee	VHL	VH032	CRBN	1065.21	1.72	6	17	35	291.16	3	3	-0.88	41.88	23	PEG2 amide	5	3.33333
O=C(NCCNC1=CC=CC(C(N2C(CC3)C(NC3=O)=O)=O)=C1C2=O)COCCOCCOCCOCCOCCOCCOCCOCCOCC(N[C@@H](C(C)(C)C)C(N4[C@H](C(NCC5=CC=C(C6=C(C)N=CS6)C=C5)=O)C[C@@H](O)C4)=O)=O	O=C(NCCNC1=CC=CC(C(N2C(CC3)C(NC3=O)=O)=O)=C1C2=O)COCCOCCOCCOCCOCCOCCOCCOCCOCC(N[C@@H](C(C)(C)C)C(N4[C@H](C(NCC5=CC=C(C6=C(C)N=CS6)C=C5)=O)C[C@@H](O)C4)=O)=O	GMMC 14d	https://www.ncbi.nlm.nih.gov/pubmed/30826187/	Uni Dundee	VHL	VH032	CRBN	1197.37	2.04	6	20	44	318.85	3	3	-1.02	51.02	32	PEG2 amide	5	3.33333
O=C(NCCNC1=CC=CC(C(N2C(CC3)C(NC3=O)=O)=O)=C1C2=O)COCCOCCOCCOCC(N[C@@H](C(C)(C)C)C(N4[C@H](C(NCC5=CC=C(C6=C(C)N=CS6)C=C5)=O)C[C@@H](O)C4)=O)=O	O=C(NCCNC1=CC=CC(C(N2C(CC3)C(NC3=O)=O)=O)=C1C2=O)COCCOCCOCCOCC(N[C@@H](C(C)(C)C)C(N4[C@H](C(NCC5=CC=C(C6=C(C)N=CS6)C=C5)=O)C[C@@H](O)C4)=O)=O	GMMC 14e	https://www.ncbi.nlm.nih.gov/pubmed/30826187/	Uni Dundee	VHL	VH032	CRBN	977.1	1.53	6	15	29	272.7	3	3	-0.78	35.78	17	PEG2amide	5	3.33333
O=C([C@H]1N(C([C@@H](NC(C2(F)CC2)=O)C(C)(C)C)=O)C[C@H](O)C1)NCC3=CC=C(C4=C(C)N=CS4)C=C3OCCOCCOCCOCC(NCCNC5=CC=CC(C(N6C(CC7)C(NC7=O)=O)=O)=C5C6=O)=O	O=C([C@H]1N(C([C@@H](NC(C2(F)CC2)=O)C(C)(C)C)=O)C[C@H](O)C1)NCC3=CC=C(C4=C(C)N=CS4)C=C3OCCOCCOCCOCC(NCCNC5=CC=CC(C(N6C(CC7)C(NC7=O)=O)=O)=C5C6=O)=O	GMMC 18a	https://www.ncbi.nlm.nih.gov/pubmed/30826187/	Uni Dundee	VHL	VH032	CRBN	1021.13	2.32	6	16	29	272.7	3	3	0	35	14	PEG2 amide	5	3.33333
O=C([C@H]1N(C([C@@H](NC(C2(F)CC2)=O)C(C)(C)SCCOCCOCCOCC(NCCNC3=CC=CC(C(N4C(CC5)C(NC5=O)=O)=O)=C3C4=O)=O)=O)C[C@H](O)C1)NCC6=CC=C(C7=C(C)N=CS7)C=C6	O=C([C@H]1N(C([C@@H](NC(C2(F)CC2)=O)C(C)(C)SCCOCCOCCOCC(NCCNC3=CC=CC(C(N4C(CC5)C(NC5=O)=O)=O)=C3C4=O)=O)=O)C[C@H](O)C1)NCC6=CC=C(C7=C(C)N=CS7)C=C6	GMMC 22a	https://www.ncbi.nlm.nih.gov/pubmed/30826187/	Uni Dundee	VHL	VH032	CRBN	1023.16	2.37	6	15	29	263.47	3	3	-0.29	35.29	14	PEG2 amide	5	3.33333
O=C([C@H]1N(C([C@@H](NC(C2(F)CC2)=O)C(C)(C)SCCOCCOCCOCCOCCOCC(NCCNC3=CC=CC(C(N4C(C(N5)=O)CCC5=O)=O)=C3C4=O)=O)=O)C[C@H](O)C1)NCC6=CC=C(C7=C(C)N=CS7)C=C6	O=C([C@H]1N(C([C@@H](NC(C2(F)CC2)=O)C(C)(C)SCCOCCOCCOCCOCCOCC(NCCNC3=CC=CC(C(N4C(C(N5)=O)CCC5=O)=O)=C3C4=O)=O)=O)C[C@H](O)C1)NCC6=CC=C(C7=C(C)N=CS7)C=C6	GMMC 22b	https://www.ncbi.nlm.nih.gov/pubmed/30826187/	Uni Dundee	VHL	VH032	CRBN	1111.27	2.58	6	17	35	281.93	3	3	-0.38	41.38	20	PEG2 amide	5	3.33333
O=C([C@H]1N(C([C@@H](NC(C2(F)CC2)=O)C(C)(SCCCC(NCCNC3=CC=CC(C(N4C(CC5)C(NC5=O)=O)=O)=C3C4=O)=O)C)=O)C[C@H](O)C1)NCC6=CC=C(C7=C(C)N=CS7)C=C6	O=C([C@H]1N(C([C@@H](NC(C2(F)CC2)=O)C(C)(SCCCC(NCCNC3=CC=CC(C(N4C(CC5)C(NC5=O)=O)=O)=C3C4=O)=O)C)=O)C[C@H](O)C1)NCC6=CC=C(C7=C(C)N=CS7)C=C6	GMMC 22c	https://www.ncbi.nlm.nih.gov/pubmed/30826187/	Uni Dundee	VHL	VH032	CRBN	919.057	2.54	6	12	22	235.78	3	3	0.54	27.46	7	alkyl amide	5	3.33333
CC(C)C[C@H](NC(=O)[C@@H](O)[C@H](N)CC1=CC=CC=C1)C(=O)NCCOCCOCCOCCNC(=O)C1=CC=C(C=C1)S(=O)(=O)CC(C)(O)C(=O)NC1=CC(=C(C=C1)C#N)C(F)(F)F	CC(C)C[C@H](NC(=O)[C@@H](O)[C@H](N)CC1=CC=CC=C1)C(=O)NCCOCCOCCOCCNC(=O)C1=CC=C(C=C1)S(=O)(=O)CC(C)(O)C(=O)NC1=CC(=C(C=C1)C#N)C(F)(F)F	SNIPER(AR)-8	https://www.ncbi.nlm.nih.gov/pubmed/28594553	National Instutite of Health Sciences	IAP	Bestatin	AR	920.999	3.1	7	16	32	268.5	4	3	0.92	37.08	12	PEG2	5	3.25
COC1=CC(C(C2=C3C=NC=C2)=CN(C)C3=O)=CC(OC)=C1CN4CCN(CCOCCOCCOC5=CC(C6=C(C)N=CS6)=CC=C5CNC([C@@H]7C[C@@H](O)CN7C([C@H](C(C)(C)C)NC(C8(C#N)CC8)=O)=O)=O)CC4	COC1=CC(C(C2=C3C=NC=C2)=CN(C)C3=O)=CC(OC)=C1CN4CCN(CCOCCOCCOC5=CC(C6=C(C)N=CS6)=CC=C5CNC([C@@H]7C[C@@H](O)CN7C([C@H](C(C)(C)C)NC(C8(C#N)CC8)=O)=O)=O)CC4	VZ 27	https://www.ncbi.nlm.nih.gov/pubmed/30540463	University of Dundee	VHL	Based on VH101	BRD9	1048.27	3.94	3	15	27	220.19	2	4	1.04	32.96	11	PEG2	4	3.25
CC(C)(C)[C@H](NC(COCCOCCN1CCN(CC2=C(OC)C=C(C(C3=C4C=NC=C3)=CN(C)C4=O)C=C2OC)CC1)=O)C(N5[C@H](C(NCC6=CC=C(C7=C(C)N=CS7)C=C6)=O)C[C@@H](O)C5)=O	CC(C)(C)[C@H](NC(COCCOCCN1CCN(CC2=C(OC)C=C(C(C3=C4C=NC=C3)=CN(C)C4=O)C=C2OC)CC1)=O)C(N5[C@H](C(NCC6=CC=C(C7=C(C)N=CS7)C=C6)=O)C[C@@H](O)C5)=O	VZ 5	https://www.ncbi.nlm.nih.gov/pubmed/30540463	University of Dundee	VHL	VH032	BRD9	953.169	3.74	3	13	23	187.17	2	4	1.08	28.92	11	PEG2	4	3.25
CC1=C(SC=N1)C2=CC=C(CNC([C@@H]3C[C@@H](O)CN3C([C@H](C(C)(C)C)NC(C4(F)CC4)=O)=O)=O)C(OCCOCCOCC(NC5CN(CC6=C(OC)C=C(C(C7=C8C=NC=C7)=CN(C)C8=O)C(OC)=C6)C5)=O)=C2	CC1=C(SC=N1)C2=CC=C(CNC([C@@H]3C[C@@H](O)CN3C([C@H](C(C)(C)C)NC(C4(F)CC4)=O)=O)=O)C(OCCOCCOCC(NC5CN(CC6=C(OC)C=C(C(C7=C8C=NC=C7)=CN(C)C8=O)C(OC)=C6)C5)=O)=C2	VZ 58	https://www.ncbi.nlm.nih.gov/pubmed/30540463	University of Dundee	VHL	VH101	BRD9	1041.21	4.03	4	15	27	222.26	3	4	1.18	32.82	11	PEG2	4	3.25
CC1=C(SC=N1)C2=CC=C(CNC([C@@H]3C[C@@H](O)CN3C([C@H](C(C)(C)C)NC(C4(F)CC4)=O)=O)=O)C(OCCOCC(NC5CN(CC6=C(OC)C=C(C(C7=C8C=NC=C7)=CN(C)C8=O)C(OC)=C6)C5)=O)=C2	CC1=C(SC=N1)C2=CC=C(CNC([C@@H]3C[C@@H](O)CN3C([C@H](C(C)(C)C)NC(C4(F)CC4)=O)=O)=O)C(OCCOCC(NC5CN(CC6=C(OC)C=C(C(C7=C8C=NC=C7)=CN(C)C8=O)C(OC)=C6)C5)=O)=C2	VZ 56	https://www.ncbi.nlm.nih.gov/pubmed/30540463	University of Dundee	VHL	VH101	BRD9	997.153	3.89	4	14	24	213.03	3	4	1.22	29.78	8	PEG2	4	3.25
CC(C)(C)[C@@H](NC(COCCOCCCCCN1CCN(CC2=C(OC)C=C(C3=CN(C)C(C4=C3C=CN=C4)=O)C=C2OC)CC1)=O)C(N5[C@@H](C(NCC6=CC=C(C7=C(C)N=CS7)C=C6)=O)C[C@H](O)C5)=O	CC(C)(C)[C@@H](NC(COCCOCCCCCN1CCN(CC2=C(OC)C=C(C3=CN(C)C(C4=C3C=CN=C4)=O)C=C2OC)CC1)=O)C(N5[C@@H](C(NCC6=CC=C(C7=C(C)N=CS7)C=C6)=O)C[C@H](O)C5)=O	VZ 23	https://www.ncbi.nlm.nih.gov/pubmed/30540463	University of Dundee	VHL	VH 032	BRD9	995.25	4.61	3	13	26	187.17	2	4	1.51	31.49	14	PEG2	4	3.25
COC(C=C(C(C1=C2C=NC=C1)=CN(C)C2=O)C(OC)=C3)=C3CN4CCN(CCOCCOCCOCCOC5=CC(C6=C(C)N=CS6)=CC=C5CNC([C@@H]7C[C@@H](O)CN7C([C@H](C(C)(C)C)NC(C8(F)CC8)=O)=O)=O)CC4	COC(C=C(C(C1=C2C=NC=C1)=CN(C)C2=O)C(OC)=C3)=C3CN4CCN(CCOCCOCCOCCOC5=CC(C6=C(C)N=CS6)=CC=C5CNC([C@@H]7C[C@@H](O)CN7C([C@H](C(C)(C)C)NC(C8(F)CC8)=O)=O)=O)CC4	VZ 50	https://www.ncbi.nlm.nih.gov/pubmed/30540463	University of Dundee	VHL	VH101	BRD9	1085.3	4.69	3	16	29	205.63	2	4	1.71	34.29	14	PEG2	4	3.25
CC1=C(SC=N1)C2=CC=C(CNC([C@@H]3C[C@@H](O)CN3C([C@H](C(C)(C)C)NC(C4(F)CC4)=O)=O)=O)C(OCCOCCCCC(NC5CN(CC6=C(OC)C=C(C(C7=C8C=NC=C7)=CN(C)C8=O)C(OC)=C6)C5)=O)=C2	CC1=C(SC=N1)C2=CC=C(CNC([C@@H]3C[C@@H](O)CN3C([C@H](C(C)(C)C)NC(C4(F)CC4)=O)=O)=O)C(OCCOCCCCC(NC5CN(CC6=C(OC)C=C(C(C7=C8C=NC=C7)=CN(C)C8=O)C(OC)=C6)C5)=O)=C2	VZ 64	https://www.ncbi.nlm.nih.gov/pubmed/30540463	University of Dundee	VHL	VH101	BRD9	1039.23	4.82	4	14	27	213.03	3	4	2.19	31.81	11	PEG-Alkyl	4	3.25
COC(C=C(C(C1=C2C=NC=C1)=CN(C)C2=O)C(OC)=C3)=C3CN4CCN(CCCCCOC5=CC(C6=C(C)N=CS6)=CC=C5CNC([C@@H]7C[C@@H](O)CN7C([C@H](C(C)(C)C)NC(C8(F)CC8)=O)=O)=O)CC4	COC(C=C(C(C1=C2C=NC=C1)=CN(C)C2=O)C(OC)=C3)=C3CN4CCN(CCCCCOC5=CC(C6=C(C)N=CS6)=CC=C5CNC([C@@H]7C[C@@H](O)CN7C([C@H](C(C)(C)C)NC(C8(F)CC8)=O)=O)=O)CC4	VZ 52	https://www.ncbi.nlm.nih.gov/pubmed/30540463	University of Dundee	VHL	VH101	BRD9	995.225	5.3	3	13	23	177.94	2	4	2.26	27.74	8	Alkyl	4	3.25
CC1=C(SC=N1)C2=CC=C(CNC([C@@H]3C[C@@H](O)CN3C([C@H](C(C)(C)C)NC(C4(F)CC4)=O)=O)=O)C(OCCOCCCCCN5CCN(CC6=C(OC)C=C(C(C7=C8C=NC=C7)=CN(C)C8=O)C=C6OC)CC5)=C2	CC1=C(SC=N1)C2=CC=C(CNC([C@@H]3C[C@@H](O)CN3C([C@H](C(C)(C)C)NC(C4(F)CC4)=O)=O)=O)C(OCCOCCCCCN5CCN(CC6=C(OC)C=C(C(C7=C8C=NC=C7)=CN(C)C8=O)C=C6OC)CC5)=C2	VZ 53	https://www.ncbi.nlm.nih.gov/pubmed/30540463	University of Dundee	VHL	VH101	BRD9	1039.28	5.23	3	14	26	187.17	2	4	2.29	30.71	11	PEG-Alkyl	4	3.25
CC1=NC(SCC(NC2=NC=C(S2)CC3=CC(OCC4=CN(N=N4)CCCCNC(COC5=C(C6=CC=C5)C(N(C6=O)C7C(NC(CC7)=O)=O)=O)=O)=CC=C3)=O)=NC(C)=C1	CC1=NC(SCC(NC2=NC=C(S2)CC3=CC(OCC4=CN(N=N4)CCCCNC(COC5=C(C6=CC=C5)C(N(C6=O)C7C(NC(CC7)=O)=O)=O)=O)=CC=C3)=O)=NC(C)=C1	PROTAC 12	https://www.ncbi.nlm.nih.gov/pubmed/28379698	University of Freiburg	CRBN	Thalidomide	Sirt2	852.942	2.79	3	14	20	225.25	2	5	2.64	25.36	9	Alkyl	4	3.25
CC(C)C[C@H](NC(=O)[C@@H](O)[C@H](N)CC1=CC=CC=C1)C(=O)NCCOCCOCCOCCNC(=O)C1=CC=C(CC2=C(C)N(N=C2C)C2=C(Cl)C=C(C=C2)C#N)C=C1	CC(C)C[C@H](NC(=O)[C@@H](O)[C@H](N)CC1=CC=CC=C1)C(=O)NCCOCCOCCOCCNC(=O)C1=CC=C(CC2=C(C)N(N=C2C)C2=C(Cl)C=C(C=C2)C#N)C=C1	SNIPER(AR)-27	https://www.ncbi.nlm.nih.gov/pubmed/28594553	National Instutite of Health Sciences	IAP	Bestatin	AR	830.424	4.56	5	11	28	200.63	3	4	3.29	32.29	12	PEG2	4	3.25
O=C1NC(CCC1N2C(C(C=CC=C3NCCOCCOCCOCCOCCOCCOCC(N4C[C@H](N5N=C(C6=CC=C(OC7=CC=C(F)C=C7F)C=C6)C(C(N)=O)=C5N)CCC4)=O)=C3C2=O)=O)=O	O=C1NC(CCC1N2C(C(C=CC=C3NCCOCCOCCOCCOCCOCCOCC(N4C[C@H](N5N=C(C6=CC=C(OC7=CC=C(F)C=C7F)C=C6)C(C(N)=O)=C5N)CCC4)=O)=C3C2=O)=O)=O	BTK PROTAC 11	https://www.ncbi.nlm.nih.gov/pubmed/30012605	Dana-Farber Cancer Institute	CRBN	Pomalidomide	BTK	991.016	3.09	4	19	28	265.21	0	4	2.25	32.75	20	PEG2	4	3.2
O=C1NC(CCC1N2C(C(C(NCCCOCCOCCOCCCNC3=CC=CC(C4=O)=C3C(N4C5C(NC(CC5)=O)=O)=O)=CC=C6)=C6C2=O)=O)=O	O=C1NC(CCC1N2C(C(C(NCCCOCCOCCOCCCNC3=CC=CC(C4=O)=C3C(N4C5C(NC(CC5)=O)=O)=O)=CC=C6)=C6C2=O)=O)=O	15d	https://www.ncbi.nlm.nih.gov/pubmed/30118587	University of Bonn	CRBN	Pomalidomide	CRBN	732.747	1.3	4	13	18	218.85	0	2	0.08	22.92	13	PEG2	4	3
O=C1NC(CCC1N2C(C(C=CC=C3OCCOCCOCCOCCOCCCNC(CCC(N4CCN5C(COCCOC6=CC(NC7=NC5=NC=C7Cl)=CC(CC8)=C6N(C)C8=O)C4)=O)=O)=C3C2=O)=O)=O	O=C1NC(CCC1N2C(C(C=CC=C3OCCOCCOCCOCCOCCCNC(CCC(N4CCN5C(COCCOC6=CC(NC7=NC5=NC=C7Cl)=CC(CC8)=C6N(C)C8=O)C4)=O)=O)=C3C2=O)=O)=O	AZ 44	https://www.ncbi.nlm.nih.gov/pubmed/30335946	Astra Zeneca	CRBN	Thalidomide	BCL6	1034.52	1.63	3	18	23	257.87	1	3	0.44	28.56	17	PEG2 PEG3	4	3
O=C1NC(CCC1N2C(C(C(NCCCOCCCCOCCCNC3=CC=CC(C4=O)=C3C(N4C5C(NC(CC5)=O)=O)=O)=CC=C6)=C6C2=O)=O)=O	O=C1NC(CCC1N2C(C(C(NCCCOCCCCOCCCNC3=CC=CC(C4=O)=C3C(N4C5C(NC(CC5)=O)=O)=O)=CC=C6)=C6C2=O)=O)=O	15c	https://www.ncbi.nlm.nih.gov/pubmed/30118587	University of Bonn	CRBN	Pomalidomide	CRBN	716.748	1.81	4	12	17	209.62	0	2	0.71	21.29	12	PEG3 PEG4	4	3
CC1=CC=CC(Cl)=C1NC(C2=CN=C(NC3=CC(N4CCN(C(COCCOCCOCC(NC5=C(C(N(C6CCC(NC6=O)=O)C7=O)=O)C7=CC=C5)=O)=O)CC4)=NC(C)=N3)S2)=O	CC1=CC=CC(Cl)=C1NC(C2=CN=C(NC3=CC(N4CCN(C(COCCOCCOCC(NC5=C(C(N(C6CCC(NC6=O)=O)C7=O)=O)C7=CC=C5)=O)=O)CC4)=NC(C)=N3)S2)=O	DAS-CRBN	https://www.ncbi.nlm.nih.gov/pubmed/30202081/	National Instutite of Health Sciences	CRBN	Pomalidomide	BCR-ABL	903.365	2.32	4	15	20	242.1	2	4	1.69	25.31	11	PEG2	4	3
COC1=CC(C(C2=C3C=NC=C2)=CN(C)C3=O)=CC(OC)=C1CN4CCN(CCOCCOCCOCCOCCOC5=CC(C6=C(C)N=CS6)=CC=C5CNC([C@@H]7C[C@@H](O)CN7C([C@H](C(C)(C)C)NC(C8(F)CC8)=O)=O)=O)CC4	COC1=CC(C(C2=C3C=NC=C2)=CN(C)C3=O)=CC(OC)=C1CN4CCN(CCOCCOCCOCCOCCOC5=CC(C6=C(C)N=CS6)=CC=C5CNC([C@@H]7C[C@@H](O)CN7C([C@H](C(C)(C)C)NC(C8(F)CC8)=O)=O)=O)CC4	VZ 29	https://www.ncbi.nlm.nih.gov/pubmed/30540463	University of Dundee	VHL	VH101	BRD9	1129.36	4.65	3	17	32	214.86	2	4	1.72	37.28	17	PEG2	4	3
O=C1NC(CCC1N2C(C(C=CC=C3NCCOCCOCCOCCOCCOCC(N4C[C@H](N5N=C(C6=CC=C(OC7=CC=C(F)C=C7F)C=C6)C(C(N)=O)=C5N)CCC4)=O)=C3C2=O)=O)=O	O=C1NC(CCC1N2C(C(C=CC=C3NCCOCCOCCOCCOCCOCC(N4C[C@H](N5N=C(C6=CC=C(OC7=CC=C(F)C=C7F)C=C6)C(C(N)=O)=C5N)CCC4)=O)=C3C2=O)=O)=O	BTK PROTAC 9	https://www.ncbi.nlm.nih.gov/pubmed/30012605	Dana-Farber Cancer Institute	CRBN	Pomalidomide	BTK	946.963	3.01	4	18	25	255.98	0	4	2.3	29.7	17	PEG2	4	3
O=C1NC(CCC1N2C(C(C=CC=C3NCCOCCOCCOCCOCC(N4C[C@H](N5N=C(C6=CC=C(OC7=CC=C(F)C=C7F)C=C6)C(C(N)=O)=C5N)CCC4)=O)=C3C2=O)=O)=O	O=C1NC(CCC1N2C(C(C=CC=C3NCCOCCOCCOCCOCC(N4C[C@H](N5N=C(C6=CC=C(OC7=CC=C(F)C=C7F)C=C6)C(C(N)=O)=C5N)CCC4)=O)=C3C2=O)=O)=O	BTK PROTAC 7	https://www.ncbi.nlm.nih.gov/pubmed/30012605	Dana-Farber Cancer Institute	CRBN	Pomalidomide	BTK	902.91	2.89	4	17	22	246.75	0	4	2.34	26.66	14	PEG2	4	3
CC1=CC=CC(Cl)=C1NC(C2=CN=C(NC3=CC(N4CCN(C(COCCOCCOCC(N[C@@H](C(N5[C@H](C(NCC6=CC=C(C7=C(C)N=CS7)C=C6)=O)C[C@@H](O)C5)=O)C(C)(C)C)=O)=O)CC4)=NC(C)=N3)S2)=O	CC1=CC=CC(Cl)=C1NC(C2=CN=C(NC3=CC(N4CCN(C(COCCOCCOCC(N[C@@H](C(N5[C@H](C(NCC6=CC=C(C7=C(C)N=CS7)C=C6)=O)C[C@@H](O)C5)=O)C(C)(C)C)=O)=O)CC4)=NC(C)=N3)S2)=O	DAS-VHL	https://www.ncbi.nlm.nih.gov/pubmed/30202081/	National Instutite of Health Sciences	VHL	VH032	BCR-ABL	1060.68	4.36	5	15	27	240.55	2	5	2.6	32.4	11	PEG2	4	3
CC1=C(SC=N1)C2=CC=C(C=C2)CNC([C@H]3C[C@H](O)CN3C([C@@H](C(C)(C)C)NC(COCCOCCOCCNC(C4=CC=CC(S(=O)(NC5=CC(N6C)=C(C=C5OC7=CC=CC(OCCC)=C7)N(C)C6=O)=O)=C4)=O)=O)=O)=O	CC1=C(SC=N1)C2=CC=C(C=C2)CNC([C@H]3C[C@H](O)CN3C([C@@H](C(C)(C)C)NC(COCCOCCOCCNC(C4=CC=CC(S(=O)(NC5=CC(N6C)=C(C=C5OC7=CC=CC(OCCC)=C7)N(C)C6=O)=O)=C4)=O)=O)=O)=O	dTRIM24	https://www.ncbi.nlm.nih.gov/pubmed/?term=Functional+TRIM24+degrader+via+conjugation+of+ineffectual+bromodomain+and+VHL+ligands	Novartis Institutes for Biomedical Research	VHL	VH032	TRIM24	1113.31	4.9	5	14	31	256.07	3	5	2.73	36.27	12	PEG2	4	3
O=C1NC(CCC1N2C(C(C=CC=C3NCCOCCOCCOCCOC(N4C[C@H](N5N=C(C6=CC=C(OC7=CC=C(F)C=C7F)C=C6)C(C(N)=O)=C5N)CCC4)=O)=C3C2=O)=O)=O	O=C1NC(CCC1N2C(C(C=CC=C3NCCOCCOCCOCCOC(N4C[C@H](N5N=C(C6=CC=C(OC7=CC=C(F)C=C7F)C=C6)C(C(N)=O)=C5N)CCC4)=O)=C3C2=O)=O)=O	BTK PROTAC 6	https://www.ncbi.nlm.nih.gov/pubmed/30012605	Dana-Farber Cancer Institute	CRBN	Pomalidomide	BTK	888.883	3.19	4	16	21	246.75	0	4	3.14	25.14	13	PEG2	4	3
CC[C@H](NC(=O)COCCCOCCCCOCCCOC1=CC=C(NC2=NC=C(Br)C(NCCCN(C)C(=O)C3CCC3)=N2)C=C1)C(=O)N1C[C@H](O)C[C@H]1C(=O)NCC1=CC=C(C=C1)C1=C(C)N=CS1	CC[C@H](NC(=O)COCCCOCCCCOCCCOC1=CC=C(NC2=NC=C(Br)C(NCCCN(C)C(=O)C3CCC3)=N2)C=C1)C(=O)N1C[C@H](O)C[C@H]1C(=O)NCC1=CC=C(C=C1)C1=C(C)N=CS1	6c	https://www.ncbi.nlm.nih.gov/pubmed/28692295	Yale University	VHL	Based on VH032	TBK1	1065.14	5.49	5	14	35	217.11	2	4	3.56	39.56	16	PEG3	4	3
CC1=C(C2=CC=C(CNC([C@@H]3C[C@@H](C)CN3C([C@@H](NC(COCCOCCOCCOCC(N[C@@H](C(C)(C)C)C(N4C[C@H](C)C[C@H]4C(NCC(C=C5)=CC=C5C(SC=N6)=C6C)=O)=O)=O)=O)C(C)(C)C)=O)=O)C=C2)SC=N1	CC1=C(C2=CC=C(CNC([C@@H]3C[C@@H](C)CN3C([C@@H](NC(COCCOCCOCCOCC(N[C@@H](C(C)(C)C)C(N4C[C@H](C)C[C@H]4C(NCC(C=C5)=CC=C5C(SC=N6)=C6C)=O)=O)=O)=O)C(C)(C)C)=O)=O)C=C2)SC=N1	CM9	https://www.ncbi.nlm.nih.gov/pubmed/29018234	University of Dundee	VHL	VH032	VHL	1087.41	5.68	4	12	33	218.66	4	4	3.75	37.75	14	PEG2	4	3
O=C1CCC2=C1C(OC3=C(C(F)(F)F)C=NC(NC4=C(OC)C=C(C(NCCOCCOCCOCC(NC(C(N5C(C(NCC6=CC=C(C7=C(C)N=CS7)C=C6)=O)CC(O)C5)=O)C(C)(C)C)=O)=O)C=C4)=N3)=CC=C2	O=C1CCC2=C1C(OC3=C(C(F)(F)F)C=NC(NC4=C(OC)C=C(C(NCCOCCOCCOCC(NC(C(N5C(C(NCC6=CC=C(C7=C(C)N=CS7)C=C6)=O)CC(O)C5)=O)C(C)(C)C)=O)=O)C=C4)=N3)=CC=C2	BI 0319	https://www.ncbi.nlm.nih.gov/pubmed/30739444	Boehringer / Dundee	VHL	VH032	PTK2	1061.14	5.54	5	18	29	240.17	3	5	4.15	35.15	12	PEG2	4	3
CC(C)(C)C1=CC(NC(NC2=CC=C(C3=CN4C(SC5=C4C=CC(OCCOCCOCCNC(CNC6=C(C(N(C7CCCNC7=O)C8=O)=O)C8=CC=C6)=O)=C5)=N3)C=C2)=O)=NO1	CC(C)(C)C1=CC(NC(NC2=CC=C(C3=CN4C(SC5=C4C=CC(OCCOCCOCCNC(CNC6=C(C(N(C7CCCNC7=O)C8=O)=O)C8=CC=C6)=O)=C5)=N3)C=C2)=O)=NO1	TL13-148	https://www.ncbi.nlm.nih.gov/pubmed/29129717	Dana-Farber Cancer Institute	CRBN	Based on Pomalodomide	Multi-kinase	877.974	4.32	5	13	21	213.62	1	6	4.61	28.61	12	PEG2	4	3
CN(CCCNC1=C(Br)C=NC(NC2=CC=C(OCCCCCOCCCOCC(=O)N[C@H](C(=O)N3C[C@H](O)C[C@H]3C(=O)NCC3=CC=C(C=C3)C3=C(C)N=CS3)C(C)(C)C)C=C2)=N1)C(=O)C1CCC1	CN(CCCNC1=C(Br)C=NC(NC2=CC=C(OCCCCCOCCCOCC(=O)N[C@H](C(=O)N3C[C@H](O)C[C@H]3C(=O)NCC3=CC=C(C=C3)C3=C(C)N=CS3)C(C)(C)C)C=C2)=N1)C(=O)C1CCC1	3f	https://www.ncbi.nlm.nih.gov/pubmed/28692295	Yale University	VHL	VH032	TBK1	1049.14	6.17	5	13	32	207.88	2	4	4.73	37.73	13	PEG5 PEG3	5	3
O=C(COCCOCCOCCOC1=CC(C(C2=CSC([C@H]3N(C([C@@H](C4CCCCC4)NC([C@H](NC)C)=O)=O)CCC3)=N2)=O)=CC=C1)NC5=NC6=C(N=C(C7=CC(C(NC8=CC(C(F)(F)F)=C(CN9CCN(CC)CC9)C=C8)=O)=CC=C7)C=C6)S5	O=C(COCCOCCOCCOC1=CC(C(C2=CSC([C@H]3N(C([C@@H](C4CCCCC4)NC([C@H](NC)C)=O)=O)CCC3)=N2)=O)=CC=C1)NC5=NC6=C(N=C(C7=CC(C(NC8=CC(C(F)(F)F)=C(CN9CCN(CC)CC9)C=C8)=O)=CC=C7)C=C6)S5	HG-IAP	https://www.ncbi.nlm.nih.gov/pubmed/30202081/	National Instutite of Health Sciences	IAP	LCL161	BCR-ABL	1211.43	6.98	4	18	32	217.19	3	6	6.2	41.2	11	PEG2	5	3
FC1=CC=C(C=C1)NC(C2(CC2)C(NC3=CC=C(C(F)=C3)OC4=C5C=C(C(OCCCOCCOCCCOC6=C(C=CC(C7=C(N=CS7)C)=C6)CNC(C8CC(CN8C(C(N9C(C%10=C(C9)C=CC=C%10)=O)C(C)C)=O)O)=O)=CC5=NC=C4)OC)=O)=O	FC1=CC=C(C=C1)NC(C2(CC2)C(NC3=CC=C(C(F)=C3)OC4=C5C=C(C(OCCCOCCOCCCOC6=C(C=CC(C7=C(N=CS7)C)=C6)CNC(C8CC(CN8C(C(N9C(C%10=C(C9)C=CC=C%10)=O)C(C)C)=O)O)=O)=CC5=NC=C4)OC)=O)=O	BES 4612	https://www.ncbi.nlm.nih.gov/pubmed/30631068	Yale University	VHL	Phenyl-VH 033	p38	1196.33	8.12	4	16	31	228.25	3	7	6.61	41.61	12	PEG2 PEG3	5	3
FC1=CC=C(C=C1)NC(C2(CC2)C(NC3=CC=C(C(F)=C3)OC4=C5C=C(C(OCCCOCCCOCCCOC6=C(C=CC(C7=C(N=CS7)C)=C6)CNC(C8CC(CN8C(C(N9C(C%10=C(C9)C=CC=C%10)=O)C(C)C)=O)O)=O)=CC5=NC=C4)OC)=O)=O	FC1=CC=C(C=C1)NC(C2(CC2)C(NC3=CC=C(C(F)=C3)OC4=C5C=C(C(OCCCOCCCOCCCOC6=C(C=CC(C7=C(N=CS7)C)=C6)CNC(C8CC(CN8C(C(N9C(C%10=C(C9)C=CC=C%10)=O)C(C)C)=O)O)=O)=CC5=NC=C4)OC)=O)=O	SJF 6685	https://www.ncbi.nlm.nih.gov/pubmed/30631068	Yale University	VHL	Phenyl-VH 033	p38	1210.36	8.46	4	16	32	228.25	3	7	6.67	42.67	13	PEG3	5	3
S=C1N(C2=CC=C(C#CC3=CC=C(N4CCN(CCCC(N[C@@H](C(C)(C)C)C(N5C[C@H](O)CC5C(NCC6=CC=C(C7=C(C)N=CS7)C=C6)=O)=O)=O)CC4)N=C3)C=C2)C(C)(C)C(N1C8=CC=C(C#N)C(C(F)(F)F)=C8)=O	S=C1N(C2=CC=C(C#CC3=CC=C(N4CCN(CCCC(N[C@@H](C(C)(C)C)C(N5C[C@H](O)CC5C(NCC6=CC=C(C7=C(C)N=CS7)C=C6)=O)=O)=O)CC4)N=C3)C=C2)C(C)(C)C(N1C8=CC=C(C#N)C(C(F)(F)F)=C8)=O	WS 20	https://www.ncbi.nlm.nih.gov/pubmed/?term=30629437	Uni Michigan	VHL	VH032	AR	1073.27	6.62	3	13	21	177.28	2	5	6.73	29.73	13	alkyne pyridine piperazine	5	3
S=C1N(C2=CC(F)=C(C(NCCCCCCCC(N[C@@H](C(C)(C)C)C(N3C[C@H](O)CC3C(NCC4=CC=C(C5=C(C)N=CS5)C=C4)=O)=O)=O)=O)C=C2)C(C)(C)C(N1C6=CC=C(C#N)C(C(F)(F)F)=C6)=O	S=C1N(C2=CC(F)=C(C(NCCCCCCCC(N[C@@H](C(C)(C)C)C(N3C[C@H](O)CC3C(NCC4=CC=C(C5=C(C)N=CS5)C=C4)=O)=O)=O)=O)C=C2)C(C)(C)C(N1C6=CC=C(C#N)C(C(F)(F)F)=C6)=O	WS 13	https://www.ncbi.nlm.nih.gov/pubmed/?term=30629437	Uni Michigan	VHL	VH032	AR	1005.16	7.01	4	12	24	187.54	3	4	6.83	31.83	9	alkyl	5	3
S=C1N(C2=CC=C(C#CC3=CC=C(N4CCN(CCC(N[C@@H](C(C)(C)C)C(N5C[C@H](O)CC5C(N[C@@H](C)C6=CC=C(C7=C(C)N=CS7)C=C6)=O)=O)=O)CC4)N=C3)C=C2)C(C)(C)C(N1C8=CC=C(C#N)C(C(F)(F)F)=C8)=O	S=C1N(C2=CC=C(C#CC3=CC=C(N4CCN(CCC(N[C@@H](C(C)(C)C)C(N5C[C@H](O)CC5C(N[C@@H](C)C6=CC=C(C7=C(C)N=CS7)C=C6)=O)=O)=O)CC4)N=C3)C=C2)C(C)(C)C(N1C8=CC=C(C#N)C(C(F)(F)F)=C8)=O	WS 23	https://www.ncbi.nlm.nih.gov/pubmed/?term=30629437	Uni Michigan	VHL	Based on VH032	AR	1073.27	6.59	3	13	20	177.28	2	5	6.93	28.93	12	alkyne pyridine piperazine	5	3
S=C1N(C2=CC(F)=C(C(NCCCCCCCCC(N[C@@H](C(C)(C)C)C(N3C[C@H](O)CC3C(NCC4=CC=C(C5=C(C)N=CS5)C=C4)=O)=O)=O)=O)C=C2)C(C)(C)C(N1C6=CC=C(C#N)C(C(F)(F)F)=C6)=O	S=C1N(C2=CC(F)=C(C(NCCCCCCCCC(N[C@@H](C(C)(C)C)C(N3C[C@H](O)CC3C(NCC4=CC=C(C5=C(C)N=CS5)C=C4)=O)=O)=O)=O)C=C2)C(C)(C)C(N1C6=CC=C(C#N)C(C(F)(F)F)=C6)=O	WS 14	https://www.ncbi.nlm.nih.gov/pubmed/?term=30629437	Uni Michigan	VHL	VH032	AR	1019.19	7.47	4	12	25	187.54	3	4	7.27	33.27	10	alkyl	5	3
S=C1N(C2=CC(F)=C(C(NCCCCCCCCCC(N[C@@H](C(C)(C)C)C(N3C[C@H](O)CC3C(NCC4=CC=C(C5=C(C)N=CS5)C=C4)=O)=O)=O)=O)C=C2)C(C)(C)C(N1C6=CC=C(C#N)C(C(F)(F)F)=C6)=O	S=C1N(C2=CC(F)=C(C(NCCCCCCCCCC(N[C@@H](C(C)(C)C)C(N3C[C@H](O)CC3C(NCC4=CC=C(C5=C(C)N=CS5)C=C4)=O)=O)=O)=O)C=C2)C(C)(C)C(N1C6=CC=C(C#N)C(C(F)(F)F)=C6)=O	WS 15	https://www.ncbi.nlm.nih.gov/pubmed/?term=30629437	Uni Michigan	VHL	VH032	AR	1033.22	7.67	4	12	26	187.54	3	4	7.72	34.72	11	alkyl	5	3
S=C1N(C2=CC(F)=C(C(NCCCCCCCCCCC(N[C@@H](C(C)(C)C)C(N3C[C@H](O)CC3C(NCC4=CC=C(C5=C(C)N=CS5)C=C4)=O)=O)=O)=O)C=C2)C(C)(C)C(N1C6=CC=C(C#N)C(C(F)(F)F)=C6)=O	S=C1N(C2=CC(F)=C(C(NCCCCCCCCCCC(N[C@@H](C(C)(C)C)C(N3C[C@H](O)CC3C(NCC4=CC=C(C5=C(C)N=CS5)C=C4)=O)=O)=O)=O)C=C2)C(C)(C)C(N1C6=CC=C(C#N)C(C(F)(F)F)=C6)=O	WS 16	https://www.ncbi.nlm.nih.gov/pubmed/?term=30629437	Uni Michigan	VHL	VH032	AR	1047.24	8.12	4	12	27	187.54	3	4	8.16	36.16	12	alkyl	5	3
O=C(CCCN1CCN(CCOCCOCCOCCOCC(N[C@@H]2CN(C([C@H](C3CCCCC3)NC(C(C)NC)=O)=O)[C@H](C(N[C@H]4C(C=CC=C5)=C5CCC4)=O)C2)=O)CC1)N6CCC[C@@H](N7N=C(C8=CC=C(OC9=CC=CC=C9)C=C8)C%10=C7N=CN=C%10N)C6	O=C(CCCN1CCN(CCOCCOCCOCCOCC(N[C@@H]2CN(C([C@H](C3CCCCC3)NC(C(C)NC)=O)=O)[C@H](C(N[C@H]4C(C=CC=C5)=C5CCC4)=O)C2)=O)CC1)N6CCC[C@@H](N7N=C(C8=CC=C(OC9=CC=CC=C9)C=C8)C%10=C7N=CN=C%10N)C6	TCP 3	https://www.ncbi.nlm.nih.gov/pubmed/?term=30807093	GSK, Uni Strathclyde	IAP	A 410099	BTK	1240.56	4.94	5	18	35	258.92	3	5	1.9	41.1	21	PEG2 piperidine	4	3
O=C(CCCN1CCN(CCOCC(N[C@@H]2CN(C([C@H](C3CCCCC3)NC([C@H](C)NC)=O)=O)[C@H](C(N[C@@H]4C(C=CC=C5)=C5CCC4)=O)C2)=O)CC1)N6CCC[C@@H](N7N=C(C8=CC=C(OC9=CC=CC=C9)C=C8)C%10=C7N=CN=C%10N)C6	O=C(CCCN1CCN(CCOCC(N[C@@H]2CN(C([C@H](C3CCCCC3)NC([C@H](C)NC)=O)=O)[C@H](C(N[C@@H]4C(C=CC=C5)=C5CCC4)=O)C2)=O)CC1)N6CCC[C@@H](N7N=C(C8=CC=C(OC9=CC=CC=C9)C=C8)C%10=C7N=CN=C%10N)C6	TCP 7	https://www.ncbi.nlm.nih.gov/pubmed/?term=30807093	GSK, Uni Strathclyde	IAP	A 410099	BTK	1108.4	5.48	5	15	26	231.23	2	5	2.11	31.89	11	ether, alykl, piperazine	5	3
O=C(CCCN1CCN(CCOCCOCCOCCOCCOCCOCC(N[C@@H]2CN(C([C@H](C3CCCCC3)NC([C@H](C)NC)=O)=O)[C@H](C(N[C@@H]4C(C=CC=C5)=C5CCC4)=O)C2)=O)CC1)N6CCC[C@@H](N7N=C(C8=CC=C(OC9=CC=CC=C9)C=C8)C%10=C7N=CN=C%10N)C6	O=C(CCCN1CCN(CCOCCOCCOCCOCCOCCOCC(N[C@@H]2CN(C([C@H](C3CCCCC3)NC([C@H](C)NC)=O)=O)[C@H](C(N[C@@H]4C(C=CC=C5)=C5CCC4)=O)C2)=O)CC1)N6CCC[C@@H](N7N=C(C8=CC=C(OC9=CC=CC=C9)C=C8)C%10=C7N=CN=C%10N)C6	TCP 9	https://www.ncbi.nlm.nih.gov/pubmed/?term=30807093	GSK, Uni Strathclyde	IAP	A 410099	BTK	1328.67	4.57	5	20	41	277.38	3	5	1.8	47.2	25	PEG2 piperazine	4	3
O=C1NC(N)=NC2=C1[N+](CC3=CC=CC=C3)=CN2[C@H]4O[C@@H](COP(O)(OP(O)(NCCCCCC(NC5=CC=CC6=C5CN(C(CC7)C(NC7=O)=O)C6=O)=O)=O)=O)[C@H](O)[C@@H]4O	O=C1NC(N)=NC2=C1[N+](CC3=CC=CC=C3)=CN2[C@H]4O[C@@H](COP(O)(OP(O)(NCCCCCC(NC5=CC=CC6=C5CN(C(CC7)C(NC7=O)=O)C6=O)=O)=O)=O)[C@H](O)[C@@H]4O	TKAM 23a	https://www.ncbi.nlm.nih.gov/pubmed/30735900/	Uni Michigan	CRBN	Lenalidomide	elF4E	888.744	-2	9	13	18	324.09	1	3	-9.51	33.51	5	alkyl	5	3
O=C1NC(N)=NC2=C1[N+](CC3=CC=C(F)C=C3)=CN2[C@H]4O[C@@H](COP(O)(OP(O)(NCCCCCC(NC5=CC=CC6=C5CN(C(CC7)C(NC7=O)=O)C6=O)=O)=O)=O)[C@H](O)[C@@H]4O	O=C1NC(N)=NC2=C1[N+](CC3=CC=C(F)C=C3)=CN2[C@H]4O[C@@H](COP(O)(OP(O)(NCCCCCC(NC5=CC=CC6=C5CN(C(CC7)C(NC7=O)=O)C6=O)=O)=O)=O)[C@H](O)[C@@H]4O	TKAM 23b	https://www.ncbi.nlm.nih.gov/pubmed/30735900/	Uni Michigan	CRBN	Lenalidomide	elF4E	906.734	-2.06	9	14	18	324.09	1	3	-9.36	33.36	5	alkyl	5	3
O=C1NC(N)=NC2=C1[N+](CC3=CC=CC=C3)=CN2[C@H]4O[C@@H](COP(O)(OP(O)(NCCOCCOCCOCCC(NC5=CC=CC6=C5CN(C(CC7)C(NC7=O)=O)C6=O)=O)=O)=O)[C@H](O)[C@@H]4O	O=C1NC(N)=NC2=C1[N+](CC3=CC=CC=C3)=CN2[C@H]4O[C@@H](COP(O)(OP(O)(NCCOCCOCCOCCC(NC5=CC=CC6=C5CN(C(CC7)C(NC7=O)=O)C6=O)=O)=O)=O)[C@H](O)[C@@H]4O	TKAM 24a	https://www.ncbi.nlm.nih.gov/pubmed/30735900/	Uni Michigan	CRBN	Lenalidomide	elF4E	978.822	-2.49	9	16	24	351.78	1	3	-10.83	40.83	11	PEG3	5	3
O=C1NC(N)=NC2=C1[N+](CC3=CC=CC=C3)=CN2[C@H]4O[C@@H](COP(OP(NCCCCCC(N[C@@H](C(C)(C)C)C(N5C(C(NCC6=CC=C(C7=C(C)N=CS7)C=C6)=O)C[C@H](O)C5)=O)=O)(O)=O)(O)=O)[C@H](O)[C@@H]4O	O=C1NC(N)=NC2=C1[N+](CC3=CC=CC=C3)=CN2[C@H]4O[C@@H](COP(OP(NCCCCCC(N[C@@H](C(C)(C)C)C(N5C(C(NCC6=CC=C(C7=C(C)N=CS7)C=C6)=O)C[C@H](O)C5)=O)=O)(O)=O)(O)=O)[C@H](O)[C@@H]4O	TKAM 30a	https://www.ncbi.nlm.nih.gov/pubmed/30735900/	Uni Michigan	VHL	VH032	elF4E	1060.05	-0.13	10	14	25	339.61	2	4	-8.19	40.19	5	alkyl	5	3
O=C1NC(N)=NC2=C1[N+](CC3=CC=C(F)C=C3)=CN2[C@H]4O[C@@H](COP(OP(NCCCCCC(N[C@@H](C(C)(C)C)C(N5C(C(NCC6=CC=C(C7=C(C)N=CS7)C=C6)=O)C[C@H](O)C5)=O)=O)(O)=O)(O)=O)[C@H](O)[C@@H]4O	O=C1NC(N)=NC2=C1[N+](CC3=CC=C(F)C=C3)=CN2[C@H]4O[C@@H](COP(OP(NCCCCCC(N[C@@H](C(C)(C)C)C(N5C(C(NCC6=CC=C(C7=C(C)N=CS7)C=C6)=O)C[C@H](O)C5)=O)=O)(O)=O)(O)=O)[C@H](O)[C@@H]4O	TKAM 30b	https://www.ncbi.nlm.nih.gov/pubmed/30735900/	Uni Michigan	VHL	VH032	elF4E	1078.04	0.08	10	15	25	339.61	2	4	-8.05	40.05	5	alkyl	5	3
CC(C)(C)[C@H](NC(COCCOCCOCC(N1CCN(CC2=C(OC)C=C(C3=CN(C)C(C4=C3C=CN=C4)=O)C=C2OC)CC1)=O)=O)C(N5[C@H](C(NCC6=CC=C(C7=C(C)N=CS7)C=C6)=O)C[C@@H](O)C5)=O	CC(C)(C)[C@H](NC(COCCOCCOCC(N1CCN(CC2=C(OC)C=C(C3=CN(C)C(C4=C3C=CN=C4)=O)C=C2OC)CC1)=O)=O)C(N5[C@H](C(NCC6=CC=C(C7=C(C)N=CS7)C=C6)=O)C[C@@H](O)C5)=O	VZ 25	https://www.ncbi.nlm.nih.gov/pubmed/30540463	University of Dundee	VHL	VH 032	BRD9	1011.21	3.15	3	14	26	213.47	2	4	0.55	32.45	14	PEG2	4	2.75
COC1=CC(C(C2=C3C=NC=C2)=CN(C)C3=O)=CC(OC)=C1CN4CCN(CCOCCOCCOCCOCCOC5=CC(C6=C(C)N=CS6)=CC=C5CNC([C@@H]7C[C@@H](O)CN7C([C@H](C(C)(C)C)NC(C8(C#N)CC8)=O)=O)=O)CC4	COC1=CC(C(C2=C3C=NC=C2)=CN(C)C3=O)=CC(OC)=C1CN4CCN(CCOCCOCCOCCOCCOC5=CC(C6=C(C)N=CS6)=CC=C5CNC([C@@H]7C[C@@H](O)CN7C([C@H](C(C)(C)C)NC(C8(C#N)CC8)=O)=O)=O)CC4	VZ 30	https://www.ncbi.nlm.nih.gov/pubmed/30540463	University of Dundee	VHL	Based on VH101	BRD9	1136.38	4.06	3	17	33	238.65	2	4	0.94	39.06	17	PEG2	4	2.75
CC1=C(SC=N1)C2=CC=C(CNC([C@@H]3C[C@@H](O)CN3C([C@H](C(C)(C)C)NC(C4(F)CC4)=O)=O)=O)C(OCCOCCCCCN5CCN(CC6=C(OC)C=C(C(C7=C8C=NC=C7)=CN(C)C8=O)C(OC)=C6)CC5)=C2	CC1=C(SC=N1)C2=CC=C(CNC([C@@H]3C[C@@H](O)CN3C([C@H](C(C)(C)C)NC(C4(F)CC4)=O)=O)=O)C(OCCOCCCCCN5CCN(CC6=C(OC)C=C(C(C7=C8C=NC=C7)=CN(C)C8=O)C(OC)=C6)CC5)=C2	VZ 54	https://www.ncbi.nlm.nih.gov/pubmed/30540463	University of Dundee	VHL	VH101	BRD9	1039.28	5.25	3	14	26	187.17	2	4	2.22	30.78	11	PEG-Alkyl	4	2.75
N[C@@H](CC1=CC=CC=C1)[C@H](C(N[C@@H](C(NCCOCCOCCOCCNC(C2=CC=C(C=C2)C3=NC(CNC4=NC=CC(NCC(C)C)=N4)=CS3)=O)=O)CC(C)C)=O)O	N[C@@H](CC1=CC=CC=C1)[C@H](C(N[C@@H](C(NCCOCCOCCOCCNC(C2=CC=C(C=C2)C3=NC(CNC4=NC=CC(NCC(C)C)=N4)=CS3)=O)=O)CC(C)C)=O)O	SNIPER(TACC3)-2	https://www.ncbi.nlm.nih.gov/pubmed/28192613	National Instutite of Health Sciences	IAP	Bestatin	TACC3	848.077	3.94	7	13	31	222.38	3	4	2.16	35.84	13	PEG2	5	2.66667
ClC1=CC(O[C@H]2C(C)(C)[C@H](NC(C3=CC=C(C#CC4CCN(C5CCN(C6=CC=CC(C(N7C8C(NC(CC8)=O)=O)=O)=C6C7=O)CC5)CC4)C=C3)=O)C2(C)C)=CC=C1C#N	ClC1=CC(O[C@H]2C(C)(C)[C@H](NC(C3=CC=C(C#CC4CCN(C5CCN(C6=CC=CC(C(N7C8C(NC(CC8)=O)=O)=O)=C6C7=O)CC5)CC4)C=C3)=O)C2(C)C)=CC=C1C#N	WS 41	https://www.ncbi.nlm.nih.gov/pubmed/?term=30629437	Uni Michigan	CRBN	Pomalidomide	AR	829.395	5.26	2	9	11	152.15	1	3	4.04	15.04	10	alkyne piperidine piperidine	4	2.66667
CC(C=C(NC1=NC(NC2=C(S(=O)(C(C)C)=O)C=CC=C2)=C(Cl)C=N1)C(OC(C)C)=C3)=C3C(CC4)CCN4CCCOCC(NC(C(C)(C)C)C(N5C(C(NCC6=CC=C(C7=C(C)N=CS7)C=C6)=O)CC(C)C5)=O)=O	CC(C=C(NC1=NC(NC2=C(S(=O)(C(C)C)=O)C=CC=C2)=C(Cl)C=N1)C(OC(C)C)=C3)=C3C(CC4)CCN4CCCOCC(NC(C(C)(C)C)C(N5C(C(NCC6=CC=C(C7=C(C)N=CS7)C=C6)=O)CC(C)C5)=O)=O	TD 020	https://www.ncbi.nlm.nih.gov/pubmed/30274783	Korea Research Institute of Chemical Technology	VHL	VH032	ALK	1084.83	8.29	4	13	25	195.49	2	5	6.26	33.26	6	PEG3	5	2.66667
CC(C=C(NC1=NC(NC2=C(S(=O)(C(C)C)=O)C=CC=C2)=C(Cl)C=N1)C(OC(C)C)=C3)=C3C(CC4)CCN4CCOCCOCCOCC(NC(C(C)(C)C)C(N5C(C(NCC6=CC=C(C7=C(C)N=CS7)C=C6)=O)CC(C)C5)=O)=O	CC(C=C(NC1=NC(NC2=C(S(=O)(C(C)C)=O)C=CC=C2)=C(Cl)C=N1)C(OC(C)C)=C3)=C3C(CC4)CCN4CCOCCOCCOCC(NC(C(C)(C)C)C(N5C(C(NCC6=CC=C(C7=C(C)N=CS7)C=C6)=O)CC(C)C5)=O)=O	TD 002	https://www.ncbi.nlm.nih.gov/pubmed/30274784	Korea Research Institute of Chemical Technology	VHL	VH032	ALK	1158.91	7.96	4	15	30	213.95	2	5	6.76	38.76	11	PEG2	5	2.66667
O=C(N(C1C(NC(CC1)=O)=O)C2=O)C3=C2C(NCCCCCCCCCCNC(C(C=C4)=CC=C4C(N[C@H](C5(C)C)C(C)(C)[C@@H]5OC6=CC=C(C#N)C(Cl)=C6)=O)=O)=CC=C3	O=C(N(C1C(NC(CC1)=O)=O)C2=O)C3=C2C(NCCCCCCCCCCNC(C(C=C4)=CC=C4C(N[C@H](C5(C)C)C(C)(C)[C@@H]5OC6=CC=C(C#N)C(Cl)=C6)=O)=O)=CC=C3	WS 40	https://www.ncbi.nlm.nih.gov/pubmed/?term=30629437	Uni Michigan	CRBN	Pomalidomide	AR	837.415	6.54	4	9	21	186.8	2	3	7.45	28.45	11	alkyl	4	2.66667
CC(C=C(NC1=NC(NC2=C(S(=O)(C(C)C)=O)C=CC=C2)=C(Cl)C=N1)C(OC(C)C)=C3)=C3C(CC4)CCN4CCCCC(NC(C(C)(C)C)C(N5C(C(NCC6=CC=C(C7=C(C)N=CS7)C=C6)=O)CC(C)C5)=O)=O	CC(C=C(NC1=NC(NC2=C(S(=O)(C(C)C)=O)C=CC=C2)=C(Cl)C=N1)C(OC(C)C)=C3)=C3C(CC4)CCN4CCCCC(NC(C(C)(C)C)C(N5C(C(NCC6=CC=C(C7=C(C)N=CS7)C=C6)=O)CC(C)C5)=O)=O	TD 009	https://www.ncbi.nlm.nih.gov/pubmed/30274781	Korea Research Institute of Chemical Technology	VHL	VH032	ALK	1068.84	8.75	4	12	24	186.26	2	5	7.46	33.46	5	Alkyl	5	2.66667
O=C(N(CC1=CC=C(C(NO)=O)C=C1)CCCCC2=CN(CCOCCNC3=C(C(N(C4C(NC(CC4)=O)=O)C5=O)=O)C5=CC=C3)N=N2)NC6=CC=CC=C6	O=C(N(CC1=CC=C(C(NO)=O)C=C1)CCCCC2=CN(CCOCCNC3=C(C(N(C4C(NC(CC4)=O)=O)C5=O)=O)C5=CC=C3)N=N2)NC6=CC=CC=C6	NP6	https://link.springer.com/article/10.1007%2Fs13238-018-0602-z	Tsinghua University	CRBN	Pomalidomide	HDAC6	751.801	2.08	5	12	20	214.44	2	4	2.64	24.36	8	PEG2, triazole	4	2.66667
CC1=C(C2=CC=C(C=C2)CNC([C@@H]3C[C@H](CN3C([C@H](C(C)(C)C)NC(COCCOCCNC4=CC=CC(C(N5C6CCC(NC6=O)=O)=O)=C4C5=O)=O)=O)O)=O)SC=N1	CC1=C(C2=CC=C(C=C2)CNC([C@@H]3C[C@H](CN3C([C@H](C(C)(C)C)NC(COCCOCCNC4=CC=CC(C(N5C6CCC(NC6=O)=O)=O)=C4C5=O)=O)=O)O)=O)SC=N1	CRBN-2-2-2-VHL	https://www.ncbi.nlm.nih.gov/pubmed/30672516	Uni Bonn	VHL	VH032	CRBN	831.942	2.01	5	12	20	225.14	2	3	0.42	25.58	8	PEG2	4	2.5
CC(C)(C)[C@H](NC(COCCOCCOCCOCCOCCN1CCN(CC2=C(OC)C=C(C3=CN(C)C(C4=C3C=CN=C4)=O)C=C2OC)CC1)=O)C(N5[C@H](C(NCC6=CC=C(C7=C(C)N=CS7)C=C6)=O)C[C@@H](O)C5)=O	CC(C)(C)[C@H](NC(COCCOCCOCCOCCOCCN1CCN(CC2=C(OC)C=C(C3=CN(C)C(C4=C3C=CN=C4)=O)C=C2OC)CC1)=O)C(N5[C@H](C(NCC6=CC=C(C7=C(C)N=CS7)C=C6)=O)C[C@@H](O)C5)=O	VZ 22	https://www.ncbi.nlm.nih.gov/pubmed/30540463	University of Dundee	VHL	VH 032	BRD9	1085.33	3.89	3	16	32	214.86	2	4	0.94	38.06	20	PEG2	4	2.5
CN[C@H](C(N[C@@H](C1CCCCC1)C(N2CCC[C@H]2C3=NC(C(C4=CC=CC(OCCOCCOCC(N(C)CCOC5=CC=C(/C(C6=CC=C(O)C=C6)=C(CC)\C7=CC=CC=C7)C=C5)=O)=C4)=O)=CS3)=O)=O)C	CN[C@H](C(N[C@@H](C1CCCCC1)C(N2CCC[C@H]2C3=NC(C(C4=CC=CC(OCCOCCOCC(N(C)CCOC5=CC=C(/C(C6=CC=C(O)C=C6)=C(CC)\C7=CC=CC=C7)C=C5)=O)=C4)=O)=CS3)=O)=O)C	SNIPER(ER)-89	https://www.ncbi.nlm.nih.gov/pubmed/28154167	National Instutite of Health Sciences	IAP	LCL161	ERα	1000.27	7.4	3	11	28	168.33	1	5	7.13	37.13	9	PEG2	5	2.5
O=C(CC1)NC(C1N2C(C(C=CC=C3OCC(NCCCCNC(C[C@@H](C4=NN=C(N4C5=C6C(C)=C(S5)C)C)N=C6C(C=C7)=CC=C7Cl)=O)=O)=C3C2=O)=O)=O	O=C(CC1)NC(C1N2C(C(C=CC=C3OCC(NCCCCNC(C[C@@H](C4=NN=C(N4C5=C6C(C)=C(S5)C)C)N=C6C(C=C7)=CC=C7Cl)=O)=O)=C3C2=O)=O)=O	dBET1	https://www.ncbi.nlm.nih.gov/pubmed/29892083	Dana-Farber Cancer Institute	CRBN	Thalidomide	BRD4	785.273	3.45	3	11	14	191.3	2	4	0.79	20.21	9	Alkyl	4	2.33333
CC1=C(C2=CC=C(CNC([C@H]3C[C@@H](CN3C([C@H](NC(COCCOCCOCCNC(C4=CC=CC(S(=O)(NC5=CC(N6C)=C(N(C6=O)C)C=C5OC7=CC(OCCCCN(C)C)=CC(OCCC)=C7)=O)=C4)=O)=O)C(C)(C)C)=O)O)=O)C=C2)SC=N1	CC1=C(C2=CC=C(CNC([C@H]3C[C@@H](CN3C([C@H](NC(COCCOCCOCCNC(C4=CC=CC(S(=O)(NC5=CC(N6C)=C(N(C6=O)C)C=C5OC7=CC(OCCCCN(C)C)=CC(OCCC)=C7)=O)=C4)=O)=O)C(C)(C)C)=O)O)=O)C=C2)SC=N1	DFCI-4107	https://www.ncbi.nlm.nih.gov/pubmed/?term=Functional+TRIM24+degrader+via+conjugation+of+ineffectual+bromodomain+and+VHL+ligands	Novartis Institutes for Biomedical Research	VHL	VH032	TRIM24	1228.49	5.41	5	16	37	268.54	3	5	0.82	44.18	12	PEG2	4	2.33333
O=C(NCCOCCOCCNC1=C2C(N=NN(C(CC3)C(NC3=O)=O)C2=O)=CC=C1)C[C@H]4C5=NN=C(C)N5C6=C(C(C)=C(C)S6)C(C7=CC=C(Cl)C=C7)=N4	O=C(NCCOCCOCCNC1=C2C(N=NN(C(CC3)C(NC3=O)=O)C2=O)=CC=C1)C[C@H]4C5=NN=C(C)N5C6=C(C(C)=C(C)S6)C(C7=CC=C(Cl)C=C7)=N4	TD-207	https://www.ncbi.nlm.nih.gov/pubmed/30684871/	Uni Science and Technology, Korea	CRBN	aminobenzotriazino glutarimide (TD)	BRD4	787.293	3.78	3	13	15	191.11	1	4	2.89	19.11	9	PEG2	4	2.33333
CN(CCCNC1=NC(NC2=CC=C(OCCCOCCCCOCCCOCC(=O)N[C@H](C(=O)N3C[C@H](O)C[C@H]3C(=O)NCC3=CC=C(C=C3)C3=C(C)N=CS3)C(C)(C)C)C=C2)=NC=C1C1CCC1)C(=O)C1CCC1	CN(CCCNC1=NC(NC2=CC=C(OCCCOCCCCOCCCOCC(=O)N[C@H](C(=O)N3C[C@H](O)C[C@H]3C(=O)NCC3=CC=C(C=C3)C3=C(C)N=CS3)C(C)(C)C)C=C2)=NC=C1C1CCC1)C(=O)C1CCC1	5h	https://www.ncbi.nlm.nih.gov/pubmed/28692295	Yale University	VHL	VH032	TBK1	1068.39	6.6	5	14	36	217.11	2	4	4.75	41.75	16	PEG4 PEG3	5	2.33333
S=C1N(C2=CC(F)=C(C(NCCCCCCC(N[C@@H](C(C)(C)C)C(N3C[C@H](O)CC3C(NCC4=CC=C(C5=C(C)N=CS5)C=C4)=O)=O)=O)=O)C=C2)C(C)(C)C(N1C6=CC=C(C#N)C(C(F)(F)F)=C6)=O	S=C1N(C2=CC(F)=C(C(NCCCCCCC(N[C@@H](C(C)(C)C)C(N3C[C@H](O)CC3C(NCC4=CC=C(C5=C(C)N=CS5)C=C4)=O)=O)=O)=O)C=C2)C(C)(C)C(N1C6=CC=C(C#N)C(C(F)(F)F)=C6)=O	WS 12	https://www.ncbi.nlm.nih.gov/pubmed/?term=30629437	Uni Michigan	VHL	VH032	AR	991.135	6.58	4	12	23	187.54	3	4	6.39	30.39	8	alkyl	5	2.33333
CN[C@@H](C)C(=O)N[C@@H](C1CCCCC1)C(=O)N1CCC[C@H]1C1=NC(=CS1)C(=O)C1=CC=CC(OCCOCCOCCOCCOC2=CC=CC=C2CN2C(C)=C(C#N)C(=C2C)C2=CC=C(C=C2)C#N)=C1	CN[C@@H](C)C(=O)N[C@@H](C1CCCCC1)C(=O)N1CCC[C@H]1C1=NC(=CS1)C(=O)C1=CC=CC(OCCOCCOCCOCCOC2=CC=CC=C2CN2C(C)=C(C#N)C(=C2C)C2=CC=C(C=C2)C#N)=C1	SNIPER(AR)-65	https://www.ncbi.nlm.nih.gov/pubmed/28594553	National Instutite of Health Sciences	IAP	LCL161	AR	984.226	6.59	2	13	29	187.84	1	5	6.54	37.54	12	PEG2	5	2.33333
FC1=CC=C(C=C1)NC(C2(CC2)C(NC3=CC=C(C(F)=C3)OC4=C5C=C(C(OCCCCOCCCCOC6=C(C=CC(C7=C(N=CS7)C)=C6)CNC(C8CC(CN8C(C(N9C(C%10=C(C9)C=CC=C%10)=O)C(C)C)=O)O)=O)=CC5=NC=C4)OC)=O)=O	FC1=CC=C(C=C1)NC(C2(CC2)C(NC3=CC=C(C(F)=C3)OC4=C5C=C(C(OCCCCOCCCCOC6=C(C=CC(C7=C(N=CS7)C)=C6)CNC(C8CC(CN8C(C(N9C(C%10=C(C9)C=CC=C%10)=O)C(C)C)=O)O)=O)=CC5=NC=C4)OC)=O)=O	SJF 6677	https://www.ncbi.nlm.nih.gov/pubmed/30631068	Yale University	VHL	Phenyl-VH 033	p38	1180.33	8.98	4	15	30	219.02	3	7	7.69	41.69	11	PEG2	5	2.33333
S=C1N(C2=CC(F)=C(C(NCCCCCCCCCCCC(N[C@@H](C(C)(C)C)C(N3C[C@H](O)CC3C(NCC4=CC=C(C5=C(C)N=CS5)C=C4)=O)=O)=O)=O)C=C2)C(C)(C)C(N1C6=CC=C(C#N)C(C(F)(F)F)=C6)=O	S=C1N(C2=CC(F)=C(C(NCCCCCCCCCCCC(N[C@@H](C(C)(C)C)C(N3C[C@H](O)CC3C(NCC4=CC=C(C5=C(C)N=CS5)C=C4)=O)=O)=O)=O)C=C2)C(C)(C)C(N1C6=CC=C(C#N)C(C(F)(F)F)=C6)=O	WS 17	https://www.ncbi.nlm.nih.gov/pubmed/?term=30629437	Uni Michigan	VHL	VH032	AR	1061.27	8.36	4	12	28	187.54	3	4	8.61	37.61	13	alkyl	5	2.33333
O=C1N(C(CC2)C(NC2=O)=O)C(C3=C1C=CC=C3NCCCCCCCC(N4C[C@H](N5C6=NC=NC(N)=C6C(C7=CC=C(C=C7)OC8=CC=CC=C8)=N5)CCC4)=O)=O	O=C1N(C(CC2)C(NC2=O)=O)C(C3=C1C=CC=C3NCCCCCCCC(N4C[C@H](N5C6=NC=NC(N)=C6C(C7=CC=C(C=C7)OC8=CC=CC=C8)=N5)CCC4)=O)=O	P6I	https://www.ncbi.nlm.nih.gov/pubmed/29875397/	Tsinghua University	CRBN	Pomalidomide	BTK	783.89	4.56	3	12	15	191.46	0	5	4.96	21.96	7	alkyl	5	2.33333
O=C(N(CC1=CC=C(C(NO)=O)C=C1)CCCCC2=CN(CCOCCOCCOCCNC3=C(C(N(C4C(NC(CC4)=O)=O)C5=O)=O)C5=CC=C3)N=N2)NC6=CC=CC=C6	O=C(N(CC1=CC=C(C(NO)=O)C=C1)CCCCC2=CN(CCOCCOCCOCCNC3=C(C(N(C4C(NC(CC4)=O)=O)C5=O)=O)C5=CC=C3)N=N2)NC6=CC=CC=C6	NP9	https://link.springer.com/article/10.1007%2Fs13238-018-0602-z	Tsinghua University	CRBN	Pomalidomide	HDAC6	839.907	2.25	5	14	26	232.9	2	4	2.54	30.46	14	PEG2, triazole	4	2.33333
O=C(N(CC1=CC=C(C(NO)=O)C=C1)CCCCC2=CN(CCOCCOCCOCCOCCNC3=C(C(N(C4C(NC(CC4)=O)=O)C5=O)=O)C5=CC=C3)N=N2)NC6=CC=CC=C6	O=C(N(CC1=CC=C(C(NO)=O)C=C1)CCCCC2=CN(CCOCCOCCOCCOCCNC3=C(C(N(C4C(NC(CC4)=O)=O)C5=O)=O)C5=CC=C3)N=N2)NC6=CC=CC=C6	NP10	https://link.springer.com/article/10.1007%2Fs13238-018-0602-z	Tsinghua University	CRBN	Pomalidomide	HDAC6	883.96	2.5	5	15	29	242.13	2	4	2.5	33.5	17	PEG2, triazole	4	2.33333
O=C1NC(N)=NC2=C1[N+](CC3=CC=CC=C3)=CN2[C@@H]4O[C@H](COP(O)(OP(O)(NCCOCCOCCOCCOCCOCCOCCOCCC(NC5=CC=CC6=C5CN(C(CC7)C(NC7=O)=O)C6=O)=O)=O)=O)[C@@H](O)[C@H]4O	O=C1NC(N)=NC2=C1[N+](CC3=CC=CC=C3)=CN2[C@@H]4O[C@H](COP(O)(OP(O)(NCCOCCOCCOCCOCCOCCOCCOCCC(NC5=CC=CC6=C5CN(C(CC7)C(NC7=O)=O)C6=O)=O)=O)=O)[C@@H](O)[C@H]4O	TKAM 25a	https://www.ncbi.nlm.nih.gov/pubmed/30735900/	Uni Michigan	CRBN	Lenalidomide	elF4E	1155.03	-2.66	9	20	36	388.7	1	3	-11.01	53.01	23	PEG7	5	2.33333
O=C1NC(N)=NC2=C1[N+](CC3=CC=C(F)C=C3)=CN2[C@@H]4O[C@H](COP(O)(OP(O)(NCCOCCOCCOCCOCCOCCOCCOCCC(NC5=CC=CC6=C5CN(C(CC7)C(NC7=O)=O)C6=O)=O)=O)=O)[C@@H](O)[C@H]4O	O=C1NC(N)=NC2=C1[N+](CC3=CC=C(F)C=C3)=CN2[C@@H]4O[C@H](COP(O)(OP(O)(NCCOCCOCCOCCOCCOCCOCCOCCC(NC5=CC=CC6=C5CN(C(CC7)C(NC7=O)=O)C6=O)=O)=O)=O)[C@@H](O)[C@H]4O	TKAM 25b	https://www.ncbi.nlm.nih.gov/pubmed/30735900/	Uni Michigan	CRBN	Lenalidomide	elF4E	1173.02	-2.36	9	21	36	388.7	1	3	-10.87	52.87	23	PEG7	5	2.33333
CC(C)(C)[C@@H](C(N1[C@@H](C[C@H](C1)O)C(NCC2=CC=C(C=C2)C3=C(N=CS3)C)=O)=O)NC(CCCCCOCCCOCCCCOC4=CC(N=CN=C5NC6=CC(Cl)=C(F)C=C6)=C5C=C4NC(/C=C/CN(C)C)=O)=O	CC(C)(C)[C@@H](C(N1[C@@H](C[C@H](C1)O)C(NCC2=CC=C(C=C2)C3=C(N=CS3)C)=O)=O)NC(CCCCCOCCCOCCCCOC4=CC(N=CN=C5NC6=CC(Cl)=C(F)C=C6)=C5C=C4NC(/C=C/CN(C)C)=O)=O	GB RTK 4	https://www.ncbi.nlm.nih.gov/pubmed/29129716	Yale University	VHL	VH032	Mutant EGFR	1072.74	7.25	5	14	33	207.88	3	5	4.77	39.77	16	PEG4 PEG5	5	2.33333
O=C(N[C@@H](C(C)(C)C)C(N1[C@@H](C[C@H](C1)O)C(NCC2=CC=C(C=C2)C3=C(N=CS3)C)=O)=O)COCCCOCCCCCOC4=CC=C(C=C4)N5C(N(C(C5(C)C)=O)C6=CC(C(F)(F)F)=C(C=C6)C#N)=S	O=C(N[C@@H](C(C)(C)C)C(N1[C@@H](C[C@H](C1)O)C(NCC2=CC=C(C=C2)C3=C(N=CS3)C)=O)=O)COCCCOCCCCCOC4=CC=C(C=C4)N5C(N(C(C5(C)C)=O)C6=CC(C(F)(F)F)=C(C=C6)C#N)=S	Enz 2b	https://www.ncbi.nlm.nih.gov/pubmed/30271980/	Yale University	VHL	VH032	AR	1020.2	6.75	3	13	27	186.13	2	4	6.14	34.14	13	PEG3 PEG5	5	2.33333
ClC1=CC=C(C2=N[C@H](C3=NN=C(N3C4=C2C(C)=C(S4)C)C)CC(NCCN5N=NC(COCCOCCOC6=C(C7=CC=C6)C(N(C7=O)C8C(NC(CC8)=O)=O)=O)=C5)=O)C=C1	ClC1=CC=C(C2=N[C@H](C3=NN=C(N3C4=C2C(C)=C(S4)C)C)CC(NCCN5N=NC(COCCOCCOC6=C(C7=CC=C6)C(N(C7=O)C8C(NC(CC8)=O)=O)=O)=C5)=O)C=C1	11c	https://www.ncbi.nlm.nih.gov/pubmed/28378579	Amgen	CRBN	Thalidomide	BRD4	869.351	3.98	2	15	17	208.62	1	6	0.69	25.31	7	PEG2 alkyl	4	2.25
O=C1NC(CCC1N2C(C(C=CC=C3NCCOCCOCC(N4C[C@H](N5N=C(C6=CC=C(OC7=CC=C(F)C=C7F)C=C6)C(C(N)=O)=C5N)CCC4)=O)=C3C2=O)=O)=O	O=C1NC(CCC1N2C(C(C=CC=C3NCCOCCOCC(N4C[C@H](N5N=C(C6=CC=C(OC7=CC=C(F)C=C7F)C=C6)C(C(N)=O)=C5N)CCC4)=O)=C3C2=O)=O)=O	BTK PROTAC 4	https://www.ncbi.nlm.nih.gov/pubmed/30012605	Dana-Farber Cancer Institute	CRBN	Pomalidomide	BTK	814.804	2.75	4	15	16	228.29	0	4	2.44	20.56	8	PEG2	4	2.25
O=C1NC(CCC1N2C(C(C=CC=C3NCCOCCOC(N4C[C@H](N5N=C(C6=CC=C(OC7=CC=C(F)C=C7F)C=C6)C(C(N)=O)=C5N)CCC4)=O)=C3C2=O)=O)=O	O=C1NC(CCC1N2C(C(C=CC=C3NCCOCCOC(N4C[C@H](N5N=C(C6=CC=C(OC7=CC=C(F)C=C7F)C=C6)C(C(N)=O)=C5N)CCC4)=O)=C3C2=O)=O)=O	BTK PROTAC 3	https://www.ncbi.nlm.nih.gov/pubmed/30012605	Dana-Farber Cancer Institute	CRBN	Pomalidomide	BTK	800.777	3.03	4	14	15	228.29	0	4	3.23	19.23	7	PEG2	4	2.25
O=C1NC(CCC1N2C(C(C=CC=C3NCCOCCOCCOC(N4C[C@H](N5N=C(C6=CC=C(OC7=CC=C(F)C=C7F)C=C6)C(C(N)=O)=C5N)CCC4)=O)=C3C2=O)=O)=O	O=C1NC(CCC1N2C(C(C=CC=C3NCCOCCOCCOC(N4C[C@H](N5N=C(C6=CC=C(OC7=CC=C(F)C=C7F)C=C6)C(C(N)=O)=C5N)CCC4)=O)=C3C2=O)=O)=O	BTK PROTAC 5	https://www.ncbi.nlm.nih.gov/pubmed/30012605	Dana-Farber Cancer Institute	CRBN	Pomalidomide	BTK	844.83	3.09	4	15	18	237.52	0	4	3.18	22.18	10	PEG2	4	2.2
CC(C)(C)[C@H](NC(COCCOCCOCCOCCN1CCN(CC2=C(OC)C=C(C(C3=C4C=NC=C3)=CN(C)C4=O)C=C2OC)CC1)=O)C(N5[C@H](C(NCC6=CC=C(C7=C(C)N=CS7)C=C6)=O)C[C@@H](O)C5)=O	CC(C)(C)[C@H](NC(COCCOCCOCCOCCN1CCN(CC2=C(OC)C=C(C(C3=C4C=NC=C3)=CN(C)C4=O)C=C2OC)CC1)=O)C(N5[C@H](C(NCC6=CC=C(C7=C(C)N=CS7)C=C6)=O)C[C@@H](O)C5)=O	VZ 6	https://www.ncbi.nlm.nih.gov/pubmed/30540463	University of Dundee	VHL	VH032	BRD9	1041.28	3.69	3	15	29	205.63	2	4	0.99	35.01	17	PEG2	4	2
O=C(N1C2C(NC(CC2)=O)=O)C3=CC=CC(OCN4C=C(C#CC5=C(CC6=CC=CC=C6)C(COCC7=NN=C(C)N78)=C8S5)C=N4)=C3C1=O	O=C(N1C2C(NC(CC2)=O)=O)C3=CC=CC(OCN4C=C(C#CC5=C(CC6=CC=CC=C6)C(COCC7=NN=C(C)N78)=C8S5)C=N4)=C3C1=O	27	https://pubs.acs.org/doi/10.1021/acs.jmedchem.8b00506	University of Michigan	CRBN	Thalidomide	BET	673.704	3.18	1	11	8	145.57	0	5	1.62	14.38	3	Alkyl	3	2
O=C([C@@H]1C[C@@H](O)CN1C([C@@H](C2=CC(C)=NO2)C(C)C)=O)N[C@@H](CC(N(CC3)CCC3N(CC4)CCC4C#CC(C=C5)=CC=C5S(CC(C)(O)C(NC6=CC=C(C#N)C(C(F)(F)F)=C6)=O)=O)=O)C7=CC=C(C8=C(C)N=CS8)C=C7	O=C([C@@H]1C[C@@H](O)CN1C([C@@H](C2=CC(C)=NO2)C(C)C)=O)N[C@@H](CC(N(CC3)CCC3N(CC4)CCC4C#CC(C=C5)=CC=C5S(CC(C)(O)C(NC6=CC=C(C#N)C(C(F)(F)F)=C6)=O)=O)=O)C7=CC=C(C8=C(C)N=CS8)C=C7	WS 31	https://www.ncbi.nlm.nih.gov/pubmed/?term=30629437	Uni Michigan	VHL	Based on VH032	AR	1109.29	6.05	4	15	23	217.33	2	5	2.18	28.82	10	alkyne piperidine piperidine	4	2
N[C@H]([C@@H](O)C(N[C@H](CC(C)C)C(NCCOCCOCCNC(C1=CC=C(C2=NC(CNC3=NC=CC(NCC(C)C)=N3)=CS2)C=C1)=O)=O)=O)CC4=CC=CC=C4	N[C@H]([C@@H](O)C(N[C@H](CC(C)C)C(NCCOCCOCCNC(C1=CC=C(C2=NC(CNC3=NC=CC(NCC(C)C)=N3)=CS2)C=C1)=O)=O)=O)CC4=CC=CC=C4	SNIPER(TACC3)-1	https://www.ncbi.nlm.nih.gov/pubmed/28192613	National Instutite of Health Sciences	IAP	Bestatin	TACC3	804.024	4.01	7	12	28	213.15	3	4	2.21	32.79	10	PEG2	5	2
O=C(CC1)NC(C1N2C(C(C(OCCCCCOC3=CC=C(CC(NC4=NNC(C5CCC5)=C4)=O)C=C3)=CC=C6)=C6C2=O)=O)=O	O=C(CC1)NC(C1N2C(C(C(OCCCCCOC3=CC=C(CC(NC4=NNC(C5CCC5)=C4)=O)C=C3)=CC=C6)=C6C2=O)=O)=O	PROTAC 3	https://www.ncbi.nlm.nih.gov/pubmed/28636052	University of Nebraska	CRBN	Thalidomide	CDK9	613.671	3.3	3	9	14	155.5	1	3	3.56	17.56	7	Alkyl	3	2
S=C1N(C2=CC(F)=C(C(NCCOCCOCCC(N[C@@H](C(C)(C)C)C(N3C[C@H](O)CC3C(NCC4=CC=C(C5=C(C)N=CS5)C=C4)=O)=O)=O)=O)C=C2)C(C)(C)C(N1C6=CC=C(C#N)C(C(F)(F)F)=C6)=O	S=C1N(C2=CC(F)=C(C(NCCOCCOCCC(N[C@@H](C(C)(C)C)C(N3C[C@H](O)CC3C(NCC4=CC=C(C5=C(C)N=CS5)C=C4)=O)=O)=O)=O)C=C2)C(C)(C)C(N1C6=CC=C(C#N)C(C(F)(F)F)=C6)=O	WS 18	https://www.ncbi.nlm.nih.gov/pubmed/?term=30629437	Uni Michigan	VHL	VH032	AR	1023.13	5.54	4	14	25	206	3	4	4.67	30.67	10	PEG2	4	2
S=C1N(C2=CC(F)=C(C(NCCC(N[C@@H](C(C)(C)C)C(N3C[C@H](O)CC3C(NCC4=CC=C(C5=C(C)N=CS5)C=C4)=O)=O)=O)=O)C=C2)C(C)(C)C(N1C6=CC=C(C#N)C(C(F)(F)F)=C6)=O	S=C1N(C2=CC(F)=C(C(NCCC(N[C@@H](C(C)(C)C)C(N3C[C@H](O)CC3C(NCC4=CC=C(C5=C(C)N=CS5)C=C4)=O)=O)=O)=O)C=C2)C(C)(C)C(N1C6=CC=C(C#N)C(C(F)(F)F)=C6)=O	WS 8	https://www.ncbi.nlm.nih.gov/pubmed/?term=30629437	Uni Michigan	VHL	VH032	AR	935.027	5.42	4	12	19	187.54	3	4	4.76	24.76	4	alkyl	4	2
S=C1N(C2=CC(F)=C(C(NCCCC(N[C@@H](C(C)(C)C)C(N3C[C@H](O)CC3C(NCC4=CC=C(C5=C(C)N=CS5)C=C4)=O)=O)=O)=O)C=C2)C(C)(C)C(N1C6=CC=C(C#N)C(C(F)(F)F)=C6)=O	S=C1N(C2=CC(F)=C(C(NCCCC(N[C@@H](C(C)(C)C)C(N3C[C@H](O)CC3C(NCC4=CC=C(C5=C(C)N=CS5)C=C4)=O)=O)=O)=O)C=C2)C(C)(C)C(N1C6=CC=C(C#N)C(C(F)(F)F)=C6)=O	WS 9	https://www.ncbi.nlm.nih.gov/pubmed/?term=30629437	Uni Michigan	VHL	VH032	AR	949.054	5.7	4	12	20	187.54	3	4	5.05	26.05	5	alkyl	5	2
S=C1N(C2=CC(F)=C(C(NCCCCC(N[C@@H](C(C)(C)C)C(N3C[C@H](O)CC3C(NCC4=CC=C(C5=C(C)N=CS5)C=C4)=O)=O)=O)=O)C=C2)C(C)(C)C(N1C6=CC=C(C#N)C(C(F)(F)F)=C6)=O	S=C1N(C2=CC(F)=C(C(NCCCCC(N[C@@H](C(C)(C)C)C(N3C[C@H](O)CC3C(NCC4=CC=C(C5=C(C)N=CS5)C=C4)=O)=O)=O)=O)C=C2)C(C)(C)C(N1C6=CC=C(C#N)C(C(F)(F)F)=C6)=O	WS 10	https://www.ncbi.nlm.nih.gov/pubmed/?term=30629437	Uni Michigan	VHL	VH032	AR	963.081	5.99	4	12	21	187.54	3	4	5.5	27.5	6	alkyl	5	2
S=C1N(C2=CC(F)=C(C(NCCCCCC(N[C@@H](C(C)(C)C)C(N3C[C@H](O)CC3C(NCC4=CC=C(C5=C(C)N=CS5)C=C4)=O)=O)=O)=O)C=C2)C(C)(C)C(N1C6=CC=C(C#N)C(C(F)(F)F)=C6)=O	S=C1N(C2=CC(F)=C(C(NCCCCCC(N[C@@H](C(C)(C)C)C(N3C[C@H](O)CC3C(NCC4=CC=C(C5=C(C)N=CS5)C=C4)=O)=O)=O)=O)C=C2)C(C)(C)C(N1C6=CC=C(C#N)C(C(F)(F)F)=C6)=O	WS 11	https://www.ncbi.nlm.nih.gov/pubmed/?term=30629437	Uni Michigan	VHL	VH032	AR	977.108	6.34	4	12	22	187.54	3	4	5.94	28.94	7	alkyl	5	2
S=C1N(C2=CC=C(C#CC3=CC=C(N4CCN(CC(N[C@@H](C(C)(C)C)C(N5C[C@H](O)CC5C(N[C@@H](C)C6=CC=C(C7=C(C)N=CS7)C=C6)=O)=O)=O)CC4)N=C3)C=C2)C(C)(C)C(N1C8=CC=C(C#N)C(C(F)(F)F)=C8)=O	S=C1N(C2=CC=C(C#CC3=CC=C(N4CCN(CC(N[C@@H](C(C)(C)C)C(N5C[C@H](O)CC5C(N[C@@H](C)C6=CC=C(C7=C(C)N=CS7)C=C6)=O)=O)=O)CC4)N=C3)C=C2)C(C)(C)C(N1C8=CC=C(C#N)C(C(F)(F)F)=C8)=O	WS 24	https://www.ncbi.nlm.nih.gov/pubmed/?term=30629437	Uni Michigan	VHL	Based on VH032	AR	1059.24	6.65	3	13	19	177.28	2	5	7.17	28.17	11	alkyne pyridine piperazine	5	2
CC(C=C(NC1=NC(NC2=C(S(=O)(C(C)C)=O)C=CC=C2)=C(Cl)C=N1)C(OC(C)C)=C3)=C3C(CC4)CCN4CCOCC(NC(C(C)(C)C)C(N5C(C(NCC6=CC=C(C7=C(C)N=CS7)C=C6)=O)CC(C)C5)=O)=O	CC(C=C(NC1=NC(NC2=C(S(=O)(C(C)C)=O)C=CC=C2)=C(Cl)C=N1)C(OC(C)C)=C3)=C3C(CC4)CCN4CCOCC(NC(C(C)(C)C)C(N5C(C(NCC6=CC=C(C7=C(C)N=CS7)C=C6)=O)CC(C)C5)=O)=O	TD 013	https://www.ncbi.nlm.nih.gov/pubmed/30274782	Korea Research Institute of Chemical Technology	VHL	VH032	ALK	1070.81	7.92	4	13	24	195.49	2	5	7.2	33.2	5	PEG2	5	2
O=C(NC1=CC=CC(NC2=NC(NC3=CC=C(OCCOC)C=C3)=NC=C2F)=C1)CCCC4=CN(CCOCCOCCNC5=CC=CC(C(N6C(CC7)C(NC7=O)=O)=O)=C5C6=O)N=N4	O=C(NC1=CC=CC(NC2=NC(NC3=CC=C(OCCOC)C=C3)=NC=C2F)=C1)CCCC4=CN(CCOCCOCCNC5=CC=CC(C(N6C(CC7)C(NC7=O)=O)=O)=C5C6=O)N=N4	P13C-3	https://www.ncbi.nlm.nih.gov/pubmed/29875397/	Tsinghua University	CRBN	Pomalidomide	BTK	893.934	3.15	5	18	25	238.34	1	5	3.9	30.9	12	PEG2, triazole	4	2
O=S([O-])(N(CC(C(O)C1O)OC1N2C=[N+](CC3=CC=C(F)C=C3)C4=C2N=C(N)NC4=O)C(CCC(NCCCCCC(NC5=CC=CC6=C5CN(C(CC7)C(NC7=O)=O)C6=O)=O)=O)=O)=O	O=S([O-])(N(CC(C(O)C1O)OC1N2C=[N+](CC3=CC=C(F)C=C3)C4=C2N=C(N)NC4=O)C(CCC(NCCCCCC(NC5=CC=CC6=C5CN(C(CC7)C(NC7=O)=O)C6=O)=O)=O)=O)=O	TKAM 13b	https://www.ncbi.nlm.nih.gov/pubmed/30735900/	Uni Michigan	CRBN	Lenalidomide	elF4E	924.915	-2.22	7	16	20	325.61	2	3	-7.58	33.58	9	alkyl, amide	5	2
C[C@H](NC(=O)COCCCOCCCCOCCCOC1=CC=C(NC2=NC=C(Br)C(NCCCN(C)C(=O)C3CCC3)=N2)C=C1)C(=O)N1C[C@H](O)C[C@H]1C(=O)NCC1=CC=C(C=C1)C1=C(C)N=CS1	C[C@H](NC(=O)COCCCOCCCCOCCCOC1=CC=C(NC2=NC=C(Br)C(NCCCN(C)C(=O)C3CCC3)=N2)C=C1)C(=O)N1C[C@H](O)C[C@H]1C(=O)NCC1=CC=C(C=C1)C1=C(C)N=CS1	6b	https://www.ncbi.nlm.nih.gov/pubmed/28692295	Yale University	VHL	Based on VH032	TBK1	1051.11	5.32	5	14	34	217.11	2	4	3.04	38.04	16	PEG3	4	1.66667
O=C(N[C@@H](C1CCCCC1)C(N2CCC[C@H]2C(N[C@H](C(NCCOCCOCCOC3=CC(SC(/N=N\C4=CC=C(N(C)C)C=C4)=N5)=C5C=C3)=O)C(C6=CC=CC=C6)C7=CC=CC=C7)=O)=O)[C@H](C)NC	O=C(N[C@@H](C1CCCCC1)C(N2CCC[C@H]2C(N[C@H](C(NCCOCCOCCOC3=CC(SC(/N=N\C4=CC=C(N(C)C)C=C4)=N5)=C5C=C3)=O)C(C6=CC=CC=C6)C7=CC=CC=C7)=O)=O)[C@H](C)NC	Compound 7	https://www.ncbi.nlm.nih.gov/pubmed/29366651	University of Tokyo	IAP	MV1	mHtt	974.235	6.72	4	12	28	187.65	3	5	6.51	36.51	10	PEG2	5	1.66667
O=C(N1)CCC(N2C(C3=C(C2=O)C(OCC(NCCOCCOCCOCCOCCOCCOCCOCCOCCOCCNC(C[C@H](N=C4C5=CC=C(Cl)C=C5)C6=NN=C(C)N6C7=C4C(C)=C(C)S7)=O)=O)=CC=C3)=O)C1=O	O=C(N1)CCC(N2C(C3=C(C2=O)C(OCC(NCCOCCOCCOCCOCCOCCOCCOCCOCCOCCNC(C[C@H](N=C4C5=CC=C(Cl)C=C5)C6=NN=C(C)N6C7=C4C(C)=C(C)S7)=O)=O)=CC=C3)=O)C1=O	dBET55	https://www.ncbi.nlm.nih.gov/pubmed/29892083	Dana-Farber Cancer Institute	CRBN	Thalidomide	BRD4	1153.7	3.45	3	20	39	274.37	2	4	-1.16	47.16	34	PEG2	4	1.33333
O=C(N1)CCC(N2C(C3=C(C2=O)C(OCC(NCCCCCCCCNC(C(S4)=C(C)C5=C4N6C(C)=NN=C6[C@@H](N=C5C7=CC=C(Cl)C=C7)CC(OC)=O)=O)=O)=CC=C3)=O)C1=O	O=C(N1)CCC(N2C(C3=C(C2=O)C(OCC(NCCCCCCCCNC(C(S4)=C(C)C5=C4N6C(C)=NN=C6[C@@H](N=C5C7=CC=C(Cl)C=C7)CC(OC)=O)=O)=O)=CC=C3)=O)C1=O	dBET23	https://www.ncbi.nlm.nih.gov/pubmed/29892083	Dana-Farber Cancer Institute	CRBN	Thalidomide	BRD4	885.39	4.39	3	12	20	217.6	2	4	1.61	25.39	13	Alkyl	5	1.33333
O=C(CCC1N2C(C3=C(C=CC=C3NCCCNC(C(SC4=C5C(C6=CC=C(C=C6)Cl)=N[C@@H](CC(OC)=O)C7=NN=C(C)N47)=C5C)=O)C2=O)=O)NC1=O	O=C(CCC1N2C(C3=C(C=CC=C3NCCCNC(C(SC4=C5C(C6=CC=C(C=C6)Cl)=N[C@@H](CC(OC)=O)C7=NN=C(C)N47)=C5C)=O)C2=O)=O)NC1=O	ZXH-2-147	https://www.ncbi.nlm.nih.gov/pubmed/29892083	Dana-Farber Cancer Institute	CRBN	Pomalidomide	BRD4	757.219	3.57	3	11	12	191.3	1	4	1.12	17.88	4	Alkyl	4	1
CN(CCCNC1=NC(NC2=CC=C(OCCCOCCCCOCCCOCC(=O)N[C@H](C(=O)N3C[C@H](O)C[C@H]3C(=O)NCC3=CC=C(C=C3)C3=C(C)N=CS3)C(C)(C)C)C=C2)=NC=C1)C(=O)C1CCC1	CN(CCCNC1=NC(NC2=CC=C(OCCCOCCCCOCCCOCC(=O)N[C@H](C(=O)N3C[C@H](O)C[C@H]3C(=O)NCC3=CC=C(C=C3)C3=C(C)N=CS3)C(C)(C)C)C=C2)=NC=C1)C(=O)C1CCC1	5a	https://www.ncbi.nlm.nih.gov/pubmed/28692295	Yale University	VHL	VH032	TBK1	1014.3	5.63	5	14	35	217.11	2	4	3.52	39.52	16	PEG4 PEG3	4	1
CN(CCCNC1=NC(NC2=CC=C(OCCOCCOCCOCC(=O)N[C@H](C(=O)N3C[C@H](O)C[C@H]3C(=O)NCC3=CC=C(C=C3)C3=C(C)N=CS3)C(C)(C)C)C=C2)=NC=C1Br)C(=O)C1CCC1	CN(CCCNC1=NC(NC2=CC=C(OCCOCCOCCOCC(=O)N[C@H](C(=O)N3C[C@H](O)C[C@H]3C(=O)NCC3=CC=C(C=C3)C3=C(C)N=CS3)C(C)(C)C)C=C2)=NC=C1Br)C(=O)C1CCC1	3e	https://www.ncbi.nlm.nih.gov/pubmed/28692295	Yale University	VHL	VH032	TBK1	1037.09	5.01	5	14	31	217.11	2	4	3.6	35.6	12	PEG2	4	1
CN(CCCNC1=NC(NC2=CC=C(OCCOCCOCC(=O)N[C@H](C(=O)N3C[C@H](O)C[C@H]3C(=O)NCC3=CC=C(C=C3)C3=C(C)N=CS3)C(C)(C)C)C=C2)=NC=C1Br)C(=O)C1CCC1	CN(CCCNC1=NC(NC2=CC=C(OCCOCCOCC(=O)N[C@H](C(=O)N3C[C@H](O)C[C@H]3C(=O)NCC3=CC=C(C=C3)C3=C(C)N=CS3)C(C)(C)C)C=C2)=NC=C1Br)C(=O)C1CCC1	3b	https://www.ncbi.nlm.nih.gov/pubmed/28692295	Yale University	VHL	VH032	TBK1	993.032	4.96	5	13	28	207.88	2	4	3.65	32.65	9	PEG2	4	1
CN(CCCNC1=NC(NC2=CC=C(OCCCOCCCOCC(=O)N[C@H](C(=O)N3C[C@H](O)C[C@H]3C(=O)NCC3=CC=C(C=C3)C3=C(C)N=CS3)C(C)(C)C)C=C2)=NC=C1Br)C(=O)C1CCC1	CN(CCCNC1=NC(NC2=CC=C(OCCCOCCCOCC(=O)N[C@H](C(=O)N3C[C@H](O)C[C@H]3C(=O)NCC3=CC=C(C=C3)C3=C(C)N=CS3)C(C)(C)C)C=C2)=NC=C1Br)C(=O)C1CCC1	3d	https://www.ncbi.nlm.nih.gov/pubmed/28692295	Yale University	VHL	VH032	TBK1	1021.09	5.49	5	13	30	207.88	2	4	3.77	34.77	11	PEG3	4	1
CN(CCCNC1=NC(NC2=CC=C(OCCCCOCC(=O)N[C@H](C(=O)N3C[C@H](O)C[C@H]3C(=O)NCC3=CC=C(C=C3)C3=C(C)N=CS3)C(C)(C)C)C=C2)=NC=C1Br)C(=O)C1CCC1	CN(CCCNC1=NC(NC2=CC=C(OCCCCOCC(=O)N[C@H](C(=O)N3C[C@H](O)C[C@H]3C(=O)NCC3=CC=C(C=C3)C3=C(C)N=CS3)C(C)(C)C)C=C2)=NC=C1Br)C(=O)C1CCC1	3a	https://www.ncbi.nlm.nih.gov/pubmed/28692295	Yale University	VHL	VH032	TBK1	977.033	5.39	5	12	27	198.65	2	4	4.28	32.28	7	PEG3	5	1
CN(CCCNC1=C(Br)C=NC(NC2=CC=C(OCCOCCCCCC(=O)N[C@H](C(=O)N3C[C@H](O)C[C@H]3C(=O)NCC3=CC=C(C=C3)C3=C(C)N=CS3)C(C)(C)C)C=C2)=N1)C(=O)C1CCC1	CN(CCCNC1=C(Br)C=NC(NC2=CC=C(OCCOCCCCCC(=O)N[C@H](C(=O)N3C[C@H](O)C[C@H]3C(=O)NCC3=CC=C(C=C3)C3=C(C)N=CS3)C(C)(C)C)C=C2)=N1)C(=O)C1CCC1	3c	https://www.ncbi.nlm.nih.gov/pubmed/28692295	Yale University	VHL	VH032	TBK1	1005.09	6	5	12	29	198.65	2	4	5.11	35.11	10	PEG2 alkyl	5	1
O=C1NC(CCC1N2C(C(C(C(NCCOCCOCCNC(C3=CC=CC(C4=O)=C3C(N4C5C(NC(CC5)=O)=O)=O)=O)=O)=CC=C6)=C6C2=O)=O)=O	O=C1NC(CCC1N2C(C(C(C(NCCOCCOCCNC(C3=CC=CC(C4=O)=C3C(N4C5C(NC(CC5)=O)=O)=O)=O)=O)=CC=C6)=C6C2=O)=O)=O	19	https://www.ncbi.nlm.nih.gov/pubmed/30118587	University of Bonn	CRBN	Thalidomide	CRBN	716.66	-0.4	4	12	15	243.76	2	2	-2.09	22.09	8	PEG2	4	0
CN1C=C(C2=CC(OC)=C(OCC(NCCOCCOCCOCCN[C@@H](C(C)(C)C)C(N3[C@H](C(NCC4=CC=C(C5=C(C)N=CS5)C=C4)=O)C[C@@H](O)C3)=O)=O)C=C2)C(SC(C(NC6CCS(CC6)(=O)=O)=N)=C7)=C7C1=O	CN1C=C(C2=CC(OC)=C(OCC(NCCOCCOCCOCCN[C@@H](C(C)(C)C)C(N3[C@H](C(NCC4=CC=C(C5=C(C)N=CS5)C=C4)=O)C[C@@H](O)C3)=O)=O)C=C2)C(SC(C(NC6CCS(CC6)(=O)=O)=N)=C7)=C7C1=O	Remillard S3	https://www.ncbi.nlm.nih.gov/pubmed/28418626	Dana-Farber Cancer Institute	VHL	VH032	BRD9	1107.37	4.35	6	16	30	259.61	2	4	-0.92	37.92	12	PEG2	5	0
CN1C=C(C2=CC(OC)=C(OCC(NCCOCCOCCN[C@@H](C(C)(C)C)C(N3[C@H](C(NCC4=CC=C(C5=C(C)N=CS5)C=C4)=O)C[C@@H](O)C3)=O)=O)C=C2)C(SC(C(NC6CCS(CC6)(=O)=O)=N)=C7)=C7C1=O	CN1C=C(C2=CC(OC)=C(OCC(NCCOCCOCCN[C@@H](C(C)(C)C)C(N3[C@H](C(NCC4=CC=C(C5=C(C)N=CS5)C=C4)=O)C[C@@H](O)C3)=O)=O)C=C2)C(SC(C(NC6CCS(CC6)(=O)=O)=N)=C7)=C7C1=O	Remillard S4	https://www.ncbi.nlm.nih.gov/pubmed/28418626	Dana-Farber Cancer Institute	VHL	VH032	BRD9	1063.31	4.12	6	15	27	250.38	2	4	-0.87	34.87	9	PEG2	5	0
O=C(NCCNC1=CC=CC(C(N2C(CC3)C(NC3=O)=O)=O)=C1C2=O)COCCOCCOCCOCCOCC(N[C@@H](C(C)(C)C)C(N4[C@H](C(NCC5=CC=C(C6=C(C)N=CS6)C=C5)=O)C[C@@H](O)C4)=O)=O	O=C(NCCNC1=CC=CC(C(N2C(CC3)C(NC3=O)=O)=O)=C1C2=O)COCCOCCOCCOCCOCC(N[C@@H](C(C)(C)C)C(N4[C@H](C(NCC5=CC=C(C6=C(C)N=CS6)C=C5)=O)C[C@@H](O)C4)=O)=O	GMMC 7b	https://www.ncbi.nlm.nih.gov/pubmed/30826187/	Uni Dundee	VHL	VH032	CRBN	1021.15	1.65	6	16	32	281.93	3	3	-0.83	38.83	20	PEG2 Amide	5	0
O=C1NC(CCC1N2C(C(C(OCCOCCOCCOC3=CC=CC(C4=O)=C3C(N4C5C(NC(CC5)=O)=O)=O)=CC=C6)=C6C2=O)=O)=O	O=C1NC(CCC1N2C(C(C(OCCOCCOCCOC3=CC=CC(C4=O)=C3C(N4C5C(NC(CC5)=O)=O)=O)=CC=C6)=C6C2=O)=O)=O	18	https://www.ncbi.nlm.nih.gov/pubmed/30118587	University of Bonn	CRBN	Thalidomide	CRBN	662.608	0.53	2	12	13	204.02	0	2	-0.55	18.55	8	PEG2	4	0
CC1=C(C2=CC=C(C=C2)CNC([C@@H]3C[C@H](CN3C([C@H](C(C)(C)C)NC(COCCOCCOCCNC4=CC=CC(C(N5C6CCC(NC6=O)=O)=O)=C4C5=O)=O)=O)O)=O)SC=N1	CC1=C(C2=CC=C(C=C2)CNC([C@@H]3C[C@H](CN3C([C@H](C(C)(C)C)NC(COCCOCCOCCNC4=CC=CC(C(N5C6CCC(NC6=O)=O)=O)=C4C5=O)=O)=O)O)=O)SC=N1	CRBN-2-2-2-2-VHL	https://www.ncbi.nlm.nih.gov/pubmed/30672516	Uni Bonn	VHL	VH032	CRBN	875.995	2.07	5	13	23	234.37	2	3	0.37	28.63	11	PEG2	4	0
CN1C=C(C2=CC(OC)=C(CN(C)CC(NCCOCCOCCOCC(N[C@@H](C(C)(C)C)C(N3[C@H](C(NCC4=CC=C(C5=C(C)N=CS5)C=C4)=O)C[C@@H](O)C3)=O)=O)=O)C(OC)=C2)C(C=CN=C6)=C6C1=O	CN1C=C(C2=CC(OC)=C(CN(C)CC(NCCOCCOCCOCC(N[C@@H](C(C)(C)C)C(N3[C@H](C(NCC4=CC=C(C5=C(C)N=CS5)C=C4)=O)C[C@@H](O)C3)=O)=O)=O)C(OC)=C2)C(C=CN=C6)=C6C1=O	Remillard S8	https://www.ncbi.nlm.nih.gov/pubmed/28418626	Dana-Farber Cancer Institute	VHL	VH032	BRD9	999.194	3.33	4	14	29	222.26	3	4	0.5	35.5	11	PEG2	4	0
ClC1=CC=C(C2=N[C@H](C3=NN=C(N3C4=C2C(C)=C(S4)C)C)CC(NCCN5N=NC(COCCOC6=C(C7=CC=C6)C(N(C7=O)C8C(NC(CC8)=O)=O)=O)=C5)=O)C=C1	ClC1=CC=C(C2=N[C@H](C3=NN=C(N3C4=C2C(C)=C(S4)C)C)CC(NCCN5N=NC(COCCOC6=C(C7=CC=C6)C(N(C7=O)C8C(NC(CC8)=O)=O)=O)=C5)=O)C=C1	11b	https://www.ncbi.nlm.nih.gov/pubmed/28378579	Amgen	CRBN	Thalidomide	BRD4	825.298	2.92	2	14	14	199.39	1	5	0.86	21.14	7	PEG2	4	0
COC1=CC(C(C2=C3C=NC=C2)=CN(C)C3=O)=CC(OC)=C1CN4CCN(CCOCCOCCOCCOCCOC5=CC(C6=C(C)N=CS6)=CC=C5CNC([C@@H]7C[C@@H](O)CN7C([C@H](C(C)(C)C)NC(C)=O)=O)=O)CC4	COC1=CC(C(C2=C3C=NC=C2)=CN(C)C3=O)=CC(OC)=C1CN4CCN(CCOCCOCCOCCOCCOC5=CC(C6=C(C)N=CS6)=CC=C5CNC([C@@H]7C[C@@H](O)CN7C([C@H](C(C)(C)C)NC(C)=O)=O)=O)CC4	VZ 31	https://www.ncbi.nlm.nih.gov/pubmed/30540463	University of Dundee	VHL	VH032	BRD9	1085.33	4.01	3	16	31	214.86	2	4	0.96	37.04	17	PEG2	4	0
CC(C)(C)[C@H](NC(COCCOCCOCCN1CCN(CC2=C(OC)C=C(C3=CN(C)C(C4=C3C=CN=C4)=O)C=C2OC)CC1)=O)C(N5[C@H](C(NCC6=CC=C(C7=C(C)N=CS7)C=C6)=O)C[C@@H](O)C5)=O	CC(C)(C)[C@H](NC(COCCOCCOCCN1CCN(CC2=C(OC)C=C(C3=CN(C)C(C4=C3C=CN=C4)=O)C=C2OC)CC1)=O)C(N5[C@H](C(NCC6=CC=C(C7=C(C)N=CS7)C=C6)=O)C[C@@H](O)C5)=O	VZ 24	https://www.ncbi.nlm.nih.gov/pubmed/30540463	University of Dundee	VHL	VH 032	BRD9	997.222	3.71	3	14	26	196.4	2	4	1.03	31.97	14	PEG2	4	0
COC1=CC(C(C2=C3C=NC=C2)=CN(C)C3=O)=CC(OC)=C1CN4CCN(CCOCCOCCOC5=CC(C6=C(C)N=CS6)=CC=C5CNC([C@@H]7C[C@@H](O)CN7C([C@H](C(C)(C)C)NC(C)=O)=O)=O)CC4	COC1=CC(C(C2=C3C=NC=C2)=CN(C)C3=O)=CC(OC)=C1CN4CCN(CCOCCOCCOC5=CC(C6=C(C)N=CS6)=CC=C5CNC([C@@H]7C[C@@H](O)CN7C([C@H](C(C)(C)C)NC(C)=O)=O)=O)CC4	VZ 28	https://www.ncbi.nlm.nih.gov/pubmed/30540463	University of Dundee	VHL	VH 032	BRD9	997.222	3.72	3	14	25	196.4	2	4	1.05	30.95	11	PEG2	4	0
O=C1C2=C(C(N1C3CCC(NC3=O)=O)=O)C(NC(COCCOCCN4CCC(N5C6=C(C(N)=NC=N6)C(C7=CC=C(OC8=CC=CC=C8)C=C7)=N5)CC4)=O)=CC=C2	O=C1C2=C(C(N1C3CCC(NC3=O)=O)=O)C(NC(COCCOCCN4CCC(N5C6=C(C(N)=NC=N6)C(C7=CC=C(OC8=CC=CC=C8)C=C7)=N5)CC4)=O)=CC=C2	MT-797	https://www.ncbi.nlm.nih.gov/pubmed/29851337	Yale University	CRBN	Pomalidomide	BTK	787.834	2.78	3	14	15	209.92	1	5	1.1	21.9	9	PEG2	4	0
O=C(N1C2C(NC(CC2)=O)=O)C3=CC=CC(N4C=C(C#CC5=C(CC6=CC=CC=C6)C(COCC7=NN=C(C)N78)=C8S5)C=N4)=C3C1=O	O=C(N1C2C(NC(CC2)=O)=O)C3=CC=CC(N4C=C(C#CC5=C(CC6=CC=CC=C6)C(COCC7=NN=C(C)N78)=C8S5)C=N4)=C3C1=O	26	https://pubs.acs.org/doi/10.1021/acs.jmedchem.8b00506	University of Michigan	CRBN	Pomalidomide	BET	643.678	3.2	1	10	6	136.34	0	5	1.32	12.68	0	None	1	0
CC1=C(C2=CC=C(C=C2)CNC([C@@H]3C[C@H](CN3C([C@H](C(C)(C)C)NC(CCCCOCCOCCOCCNC4=CC=CC(C(N5C6CCC(NC6=O)=O)=O)=C4C5=O)=O)=O)O)=O)SC=N1	CC1=C(C2=CC=C(C=C2)CNC([C@@H]3C[C@H](CN3C([C@H](C(C)(C)C)NC(CCCCOCCOCCOCCNC4=CC=CC(C(N5C6CCC(NC6=O)=O)=O)=C4C5=O)=O)=O)O)=O)SC=N1	CRBN-2-2-2-5-VHL	https://www.ncbi.nlm.nih.gov/pubmed/30672516	Uni Bonn	VHL	VH032	CRBN	918.076	2.99	5	13	26	234.37	2	3	1.34	30.66	14	PEG2 PEG4	4	0
O=C1C2=C(C(NC(COCCN3CCC(CC3)N4C5=C(C(C6=CC=C(C=C6)OC7=CC=CC=C7)=N4)C(N)=NC=N5)=O)=CC=C2)C(N1C8CCC(NC8=O)=O)=O	O=C1C2=C(C(NC(COCCN3CCC(CC3)N4C5=C(C(C6=CC=C(C=C6)OC7=CC=CC=C7)=N4)C(N)=NC=N5)=O)=CC=C2)C(N1C8CCC(NC8=O)=O)=O	MT-783	https://www.ncbi.nlm.nih.gov/pubmed/29851337	Yale University	CRBN	Pomalidomide	BTK	743.781	2.71	3	13	12	200.69	1	5	1.5	18.5	6	PEG2	4	0
O=C(C(CC1)N(C2=O)C(C(C2=CC=C3)=C3NCCOCCOCCOCCOCCN(N=N4)C=C4CCCC(N5CCN(C(C6=CC(CC7=NNC(C8=C7C=CC=C8)=O)=CC=C6F)=O)CC5)=O)=O)NC1=O	O=C(C(CC1)N(C2=O)C(C(C2=CC=C3)=C3NCCOCCOCCOCCOCCN(N=N4)C=C4CCCC(N5CCN(C(C6=CC(CC7=NNC(C8=C7C=CC=C8)=O)=CC=C6F)=O)CC5)=O)=O)NC1=O	ZQ 4	https://www.ncbi.nlm.nih.gov/pubmed/?term=30540295	Tsinghua University	CRBN	Pomalidomide	PARP1	979.036	2.85	3	17	26	242.54	0	4	1.61	31.39	14	PEG2	4	0
O=C(C(CC1)N2C(C3=C(C2=O)C(NCCNC(C[C@@H](C(N4C5=C6C(C)=C(C)S5)=NN=C4C)N=C6C7=CC=C(Cl)C=C7)=O)=CC=C3)=O)NC1=O	O=C(C(CC1)N2C(C3=C(C2=O)C(NCCNC(C[C@@H](C(N4C5=C6C(C)=C(C)S5)=NN=C4C)N=C6C7=CC=C(Cl)C=C7)=O)=CC=C3)=O)NC1=O	dBET57	https://www.ncbi.nlm.nih.gov/pubmed/29892083	Dana-Farber Cancer Institute	CRBN	Pomalidomide	BRD4	699.183	3.2	3	10	9	165	1	4	1.91	14.09	3	Alkyl	2	0
O=C(N)C1=CC=CC2=CN(C3=CC=C(C4=CN(CCOCCOCCOCCNC(CCC(NC(C(N5[C@@H](C(NCC6=CC=C(C7=C(C)N=CS7)C=C6)=O)C[C@H](O)C5)=O)C(C)(C)C)=O)=O)N=N4)C=C3)N=C21	O=C(N)C1=CC=CC2=CN(C3=CC=C(C4=CN(CCOCCOCCOCCNC(CCC(NC(C(N5[C@@H](C(NCC6=CC=C(C7=C(C)N=CS7)C=C6)=O)C[C@H](O)C5)=O)C(C)(C)C)=O)=O)N=N4)C=C3)N=C21	ZQ 2	https://www.ncbi.nlm.nih.gov/pubmed/?term=30540295	Tsinghua University	VHL	VH032	PARP1	992.166	3.08	5	15	29	254.54	3	6	1.96	36.04	16	PEG2	4	0
O=C(COCCOCCOCCOCCN(CC1)CCN1CC2=C(OC)C=C(C(C3=C4C=NC=C3)=CN(C)C4=O)C=C2OC)NCC5=CC=C(S(NC6=CC=CC7=C6NC=C7Cl)(=O)=O)C=C5	O=C(COCCOCCOCCOCCN(CC1)CCN1CC2=C(OC)C=C(C(C3=C4C=NC=C3)=CN(C)C4=O)C=C2OC)NCC5=CC=C(S(NC6=CC=CC7=C6NC=C7Cl)(=O)=O)C=C5	VZ 10	https://www.ncbi.nlm.nih.gov/pubmed/30540463	University of Dundee	DCAF15	Indisulam	BRD9	946.514	3.99	3	14	25	181.83	1	5	2.07	30.93	17	PEG2	4	0
O=C(C(CC1)N2C(C3=C(C2=O)C=CC=C3OCC(NCCOCCNC(CCCOC4=NC5=C(C=C4)C=C(C(NC6=CC(NC(C7=CC=C8OCCOC8=C7)=O)=CC=C6C)=O)C=C5)=O)=O)=O)NC1=O	O=C(C(CC1)N2C(C3=C(C2=O)C=CC=C3OCC(NCCOCCNC(CCCOC4=NC5=C(C=C4)C=C(C(NC6=CC(NC(C7=CC=C8OCCOC8=C7)=O)=CC=C6C)=O)C=C5)=O)=O)=O)NC1=O	Compound 3	https://www.ncbi.nlm.nih.gov/pubmed/?term=Demonstrating+In-Cell+Target+Engagement+Using+a+Pirin+Protein+Degradation+Probe+(CCT367766)	ICR	CRBN	Thalidomide	Pirin	941.951	3.08	5	14	23	258.46	4	5	2.08	28.92	15	PEG2 amide alkyl	4	0
O=C(N)C1=CC=CC2=CN(C3=CC=C(C4=CN(CCOCCOCCOCCOCCNC5=C(C(N(C6CCC(NC6=O)=O)C7=O)=O)C7=CC=C5)N=N4)C=C3)N=C21	O=C(N)C1=CC=CC2=CN(C3=CC=C(C4=CN(CCOCCOCCOCCOCCNC5=C(C(N(C6CCC(NC6=O)=O)C7=O)=O)C7=CC=C5)N=N4)C=C3)N=C21	ZQ 1	https://www.ncbi.nlm.nih.gov/pubmed/?term=30540295	Tsinghua University	CRBN	Pomalidomide	PARP1	779.811	1.81	3	15	20	219.15	0	5	2.14	25.86	14	PEG2	4	0
O=C(NCC1=CC=C(S(NC2=CC=CC3=C2NC=C3Cl)(=O)=O)C=C1)COCCOCCN(CC4)CCN4CC5=C(OC)C=C(C(C6=C7C=NC=C6)=CN(C)C7=O)C=C5OC	O=C(NCC1=CC=C(S(NC2=CC=CC3=C2NC=C3Cl)(=O)=O)C=C1)COCCOCCN(CC4)CCN4CC5=C(OC)C=C(C(C6=C7C=NC=C6)=CN(C)C7=O)C=C5OC	VZ 9	https://www.ncbi.nlm.nih.gov/pubmed/30540463	University of Dundee	DCAF15	Indisulam	BRD9	858.408	3.74	3	12	19	163.37	1	5	2.16	24.84	11	PEG2	4	0
CN(CCCNC1=NC(NC2=CC=C(OCCCOCCCCOCCCOCC(=O)NCC(=O)N3C[C@H](O)C[C@H]3C(=O)NCC3=CC=C(C=C3)C3=C(C)N=CS3)C=C2)=NC=C1Br)C(=O)C1CCC1	CN(CCCNC1=NC(NC2=CC=C(OCCCOCCCCOCCCOCC(=O)NCC(=O)N3C[C@H](O)C[C@H]3C(=O)NCC3=CC=C(C=C3)C3=C(C)N=CS3)C=C2)=NC=C1Br)C(=O)C1CCC1	6a	https://www.ncbi.nlm.nih.gov/pubmed/28692295	Yale University	VHL	Based on VH032	TBK1	1037.09	4.96	5	14	34	217.11	2	4	2.47	38.53	16	PEG3	4	0
O=C1NC(CCC1N2C(C(C=CC=C3NCCOCC(N4C[C@H](N5N=C(C6=CC=C(OC7=CC=C(F)C=C7F)C=C6)C(C(N)=O)=C5N)CCC4)=O)=C3C2=O)=O)=O	O=C1NC(CCC1N2C(C(C=CC=C3NCCOCC(N4C[C@H](N5N=C(C6=CC=C(OC7=CC=C(F)C=C7F)C=C6)C(C(N)=O)=C5N)CCC4)=O)=C3C2=O)=O)=O	BTK PROTAC 2	https://www.ncbi.nlm.nih.gov/pubmed/30012605	Dana-Farber Cancer Institute	CRBN	Pomalidomide	BTK	770.751	2.64	4	14	13	219.06	0	4	2.48	17.52	5	PEG2	4	0
O=C1NC(CCC1N2C(C(C=CC=C3NCCOC(N4C[C@H](N5N=C(C6=CC=C(OC7=CC=C(F)C=C7F)C=C6)C(C(N)=O)=C5N)CCC4)=O)=C3C2=O)=O)=O	O=C1NC(CCC1N2C(C(C=CC=C3NCCOC(N4C[C@H](N5N=C(C6=CC=C(OC7=CC=C(F)C=C7F)C=C6)C(C(N)=O)=C5N)CCC4)=O)=C3C2=O)=O)=O	BTK PROTAC 1	https://www.ncbi.nlm.nih.gov/pubmed/30012605	Dana-Farber Cancer Institute	CRBN	Pomalidomide	BTK	756.724	2.95	4	13	12	219.06	0	4	3.28	16.28	4	PEG2	4	0
CC1=C(C2=CC(OCCOCCOCCOCCOCCOCC(N[C@@H](C(C)(C)C)C(N3C[C@H](C)C[C@H]3C(NCC(C=C4)=CC=C4C(SC=N5)=C5C)=O)=O)=O)=C(CNC([C@@H]6C[C@@H](C)CN6C([C@@H](NC(C)=O)C(C)(C)C)=O)=O)C=C2)SC=N1	CC1=C(C2=CC(OCCOCCOCCOCCOCCOCC(N[C@@H](C(C)(C)C)C(N3C[C@H](C)C[C@H]3C(NCC(C=C4)=CC=C4C(SC=N5)=C5C)=O)=O)=O)=C(CNC([C@@H]6C[C@@H](C)CN6C([C@@H](NC(C)=O)C(C)(C)C)=O)=O)C=C2)SC=N1	CMP112	https://www.ncbi.nlm.nih.gov/pubmed/29018234	University of Dundee	VHL	VH032	VHL	1175.51	6.17	4	14	38	237.12	4	4	3.67	42.67	18	PEG2	4	0
CC1=C(C2=CC(OCCOCCOCCOCCOCCOC3=C(CNC([C@@H]4C[C@@H](C)CN4C([C@@H](NC(C)=O)C(C)(C)C)=O)=O)C=CC(C(SC=N5)=C5C)=C3)=C(CNC([C@@H]6C[C@@H](C)CN6C([C@@H](NC(C)=O)C(C)(C)C)=O)=O)C=C2)SC=N1	CC1=C(C2=CC(OCCOCCOCCOCCOCCOC3=C(CNC([C@@H]4C[C@@H](C)CN4C([C@@H](NC(C)=O)C(C)(C)C)=O)=O)C=CC(C(SC=N5)=C5C)=C3)=C(CNC([C@@H]6C[C@@H](C)CN6C([C@@H](NC(C)=O)C(C)(C)C)=O)=O)C=C2)SC=N1	CMP106	https://www.ncbi.nlm.nih.gov/pubmed/29018234	University of Dundee	VHL	VH032	VHL	1175.51	6.13	4	14	37	237.12	4	4	3.69	41.69	16	PEG2	4	0
CC1=C(C2=CC(OCCOCCOCCOCCOCCOCC(N[C@@H](C(C)(C)C)C(N3C[C@H](C)C[C@H]3C(NCC(C=C4)=CC=C4C(SC=N5)=C5C)=O)=O)=O)=C(CNC([C@@H]6C[C@@H](C)CN6C([C@@H](NC(C7(C#N)CC7)=O)C(C)(C)C)=O)=O)C=C2)SC=N1	CC1=C(C2=CC(OCCOCCOCCOCCOCCOCC(N[C@@H](C(C)(C)C)C(N3C[C@H](C)C[C@H]3C(NCC(C=C4)=CC=C4C(SC=N5)=C5C)=O)=O)=O)=C(CNC([C@@H]6C[C@@H](C)CN6C([C@@H](NC(C7(C#N)CC7)=O)C(C)(C)C)=O)=O)C=C2)SC=N1	CMP113	https://www.ncbi.nlm.nih.gov/pubmed/29018234	University of Dundee	VHL	VH032	VHL	1226.56	6.07	4	15	40	260.91	4	4	3.71	44.71	18	PEG2	4	0
O=C(COCCOCCOCC(NC1=C(C(N(C2CCC(NC2=O)=O)C3=O)=O)C3=CC=C1)=O)NC4=NC5=C(N=C(C6=CC(C(NC7=CC(C(F)(F)F)=C(CN8CCN(CC)CC8)C=C7)=O)=CC=C6)C=C5)S4	O=C(COCCOCCOCC(NC1=C(C(N(C2CCC(NC2=O)=O)C3=O)=O)C3=CC=C1)=O)NC4=NC5=C(N=C(C6=CC(C(NC7=CC(C(F)(F)F)=C(CN8CCN(CC)CC8)C=C7)=O)=CC=C6)C=C5)S4	HG-CRBN	https://www.ncbi.nlm.nih.gov/pubmed/30202081/	National Instutite of Health Sciences	CRBN	Pomalidomide	BCR-ABL	1000.02	3.74	4	17	23	229.74	3	5	3.73	28.73	11	PEG2	4	0
CC1=C(C2=CC(OCCOCCOCCOCCOCCOC3=C(CNC([C@@H]4C[C@@H](C)CN4C([C@@H](NC(C5(C#N)CC5)=O)C(C)(C)C)=O)=O)C=CC(C(SC=N6)=C6C)=C3)=C(CNC([C@@H]7C[C@@H](C)CN7C([C@@H](NC(C8(C#N)CC8)=O)C(C)(C)C)=O)=O)C=C2)SC=N1	CC1=C(C2=CC(OCCOCCOCCOCCOCCOC3=C(CNC([C@@H]4C[C@@H](C)CN4C([C@@H](NC(C5(C#N)CC5)=O)C(C)(C)C)=O)=O)C=CC(C(SC=N6)=C6C)=C3)=C(CNC([C@@H]7C[C@@H](C)CN7C([C@@H](NC(C8(C#N)CC8)=O)C(C)(C)C)=O)=O)C=C2)SC=N1	CMP108	https://www.ncbi.nlm.nih.gov/pubmed/29018234	University of Dundee	VHL	VH298	VHL	1277.61	6.33	4	16	41	284.7	4	4	3.77	45.77	16	PEG2	5	0
ClC1=CC=C2C(NC([C@@]23C4(CCCCC4)N[C@@H](C(NC5=CC=C(C(NC6=CC=CC7=C6CN(C7=O)C8CCC(NC8=O)=O)=O)C=C5)=O)[C@@H]3C9=CC=CC(Cl)=C9F)=O)=C1	ClC1=CC=C2C(NC([C@@]23C4(CCCCC4)N[C@@H](C(NC5=CC=C(C(NC6=CC=CC7=C6CN(C7=O)C8CCC(NC8=O)=O)=O)C=C5)=O)[C@@H]3C9=CC=CC(Cl)=C9F)=O)=C1	YL 3	https://www.ncbi.nlm.nih.gov/pubmed/30525597/	Uni Michigan	CRBN	lenalidomide	MDM2	823.703	4.56	5	8	8	165.81	2	4	4.06	13.06	0	N/A	3	0
O=C(C1=C2C=CC=C1NCCOCCOCCCCCCN([C@@H]3CC([C@@]4(CC3)C)CC[C@@]5(C4CC[C@]6([C@]5(CC[C@@H]6C7=CC8=C(C=C7)C=CN=C8)[H])[H])[H])C)N(C9CCC(NC9=O)=O)C2=O	O=C(C1=C2C=CC=C1NCCOCCOCCCCCCN([C@@H]3CC([C@@]4(CC3)C)CC[C@@]5(C4CC[C@]6([C@]5(CC[C@@H]6C7=CC8=C(C=C7)C=CN=C8)[H])[H])[H])C)N(C9CCC(NC9=O)=O)C2=O	Compound 28	https://www.ncbi.nlm.nih.gov/pubmed/29937979/	Dana-Farber Cancer Institute	CRBN	Pomalidomide	CDK8	846.126	5.75	2	9	17	129.64	0	3	4.25	21.25	15	PEG2	3	0
OC1=CC=C2C(SC(C3=CC=C(O)C=C3)=C2C(C4=CC=C(OCCN(CCC5CCN(CCCC(N[C@@H](C(C)(C)C)C(N6[C@H](C(N[C@@H](C)C7=CC=C(C8=C(C)N=CS8)C=C7)=O)C[C@@H](O)C6)=O)=O)CC5)CC)C=C4)=O)=C1	OC1=CC=C2C(SC(C3=CC=C(O)C=C3)=C2C(C4=CC=C(OCCN(CCC5CCN(CCCC(N[C@@H](C(C)(C)C)C(N6[C@H](C(N[C@@H](C)C7=CC=C(C8=C(C)N=CS8)C=C7)=O)C[C@@H](O)C6)=O)=O)CC5)CC)C=C4)=O)=C1	SW 33	https://pubs.acs.org/doi/abs/10.1021/acs.jmedchem.8b01572	Uni Michigan	VHL	VH032	ER	1057.38	7.52	5	11	25	184.34	2	6	4.42	32.42	10	alkyl piperdine	5	0
ClC1=CC=C2C(NC([C@@]23C4(CCCCC4)N[C@@H](C(NC5=CC=C(C(NCCOCCOCCOCCC(N[C@@H](C(C)(C)C)C(N6[C@H](C(N[C@H](C7=CC=C(C8=C(C)N=CS8)C=C7)C)=O)C[C@@H](O)C6)=O)=O)=O)C=C5)=O)[C@@H]3C9=CC=CC(Cl)=C9F)=O)=C1	ClC1=CC=C2C(NC([C@@]23C4(CCCCC4)N[C@@H](C(NC5=CC=C(C(NCCOCCOCCOCCC(N[C@@H](C(C)(C)C)C(N6[C@H](C(N[C@H](C7=CC=C(C8=C(C)N=CS8)C=C7)C)=O)C[C@@H](O)C6)=O)=O)=O)C=C5)=O)[C@@H]3C9=CC=CC(Cl)=C9F)=O)=C1	YL 20	https://www.ncbi.nlm.nih.gov/pubmed/30525597/	Uni Michigan	VHL	VH032	MDM2	1212.27	6.68	7	13	28	238.12	4	5	4.77	34.77	13	PEG2	6	0
ClC1=CC(O[C@H]2C(C)(C)[C@H](NC(C3=CC=C(C#CC4CCN(C5CCN(C(C[C@@H](NC([C@@H]6C[C@@H](O)CN6C([C@@H](NC(C7(F)CC7)=O)C(C)(C)C)=O)=O)C8=CC=C(C9=C(C)N=CS9)C=C8)=O)CC5)CC4)C=C3)=O)C2(C)C)=CC=C1C#N	ClC1=CC(O[C@H]2C(C)(C)[C@H](NC(C3=CC=C(C#CC4CCN(C5CCN(C(C[C@@H](NC([C@@H]6C[C@@H](O)CN6C([C@@H](NC(C7(F)CC7)=O)C(C)(C)C)=O)=O)C8=CC=C(C9=C(C)N=CS9)C=C8)=O)CC5)CC4)C=C3)=O)C2(C)C)=CC=C1C#N	WS 37	https://www.ncbi.nlm.nih.gov/pubmed/?term=30629437	Uni Michigan	VHL	Based on VH032	AR	1129.83	7.56	4	11	23	196.77	3	4	4.85	28.85	10	alkyne piperidine piperidine	5	0
ClC1=CC(O[C@H]2C(C)(C)[C@H](NC(C3=CC=C(C#CC4CCN(C5CCN(C(C[C@H](NC([C@@H]6C[C@@H](O)CN6C([C@H](NC(C7(F)CC7)=O)C(C)(C)C)=O)=O)C8=CC=C(C9=C(C)N=CS9)C=C8)=O)CC5)CC4)C=C3)=O)C2(C)C)=CC=C1C#N	ClC1=CC(O[C@H]2C(C)(C)[C@H](NC(C3=CC=C(C#CC4CCN(C5CCN(C(C[C@H](NC([C@@H]6C[C@@H](O)CN6C([C@H](NC(C7(F)CC7)=O)C(C)(C)C)=O)=O)C8=CC=C(C9=C(C)N=CS9)C=C8)=O)CC5)CC4)C=C3)=O)C2(C)C)=CC=C1C#N	WS 38	https://www.ncbi.nlm.nih.gov/pubmed/?term=30629437	Uni Michigan	VHL	Based on VH032	AR	1129.83	7.54	4	11	23	196.77	3	4	4.85	28.85	10	alkyne piperidine piperidine	5	0
ClC1=CC=C2C(NC([C@]23C4(CCCCC4)N[C@H](C(NC5=CC=C(C(NCCCC#CC6=CC=CC(C7=O)=C6CN7C8C(NC(CC8)=O)=O)=O)C=C5)=O)[C@H]3C9=CC=CC(Cl)=C9F)=O)=C1	ClC1=CC=C2C(NC([C@]23C4(CCCCC4)N[C@H](C(NC5=CC=C(C(NCCCC#CC6=CC=CC(C7=O)=C6CN7C8C(NC(CC8)=O)=O)=O)C=C5)=O)[C@H]3C9=CC=CC(Cl)=C9F)=O)=C1	YL 21	https://www.ncbi.nlm.nih.gov/pubmed/30525597/	Uni Michigan	CRBN	Lenalidomide	MDM2	889.806	5.6	5	8	12	165.81	2	4	4.97	17.97	6	alkyne	4	0
OC1=CC=C2C(SC(C3=CC=C(O)C=C3)=C2C(C4=CC=C(OCCN(CCOCCOCCOCC#CC5=C(CN(C6CCC(NC6=O)=O)C7=O)C7=CC=C5)CC)C=C4)=O)=C1	OC1=CC=C2C(SC(C3=CC=C(O)C=C3)=C2C(C4=CC=C(OCCN(CCOCCOCCOCC#CC5=C(CN(C6CCC(NC6=O)=O)C7=O)C7=CC=C5)CC)C=C4)=O)=C1	SW 12	https://pubs.acs.org/doi/abs/10.1021/acs.jmedchem.8b01572	Uni Michigan	CRBN	Based on Thalidomide	ER	845.964	5.24	3	11	21	164.17	0	5	5.1	28.1	12	alkyne PEG2	4	0
ClC1=CC=C2C(NC([C@@]23C4(CCCCC4)N[C@@H](C(NC5=CC=C(C(NCCCC#CC6=CC=CC(C7=O)=C6CN7C8C(N(C)C(CC8)=O)=O)=O)C=C5)=O)[C@@H]3C9=CC=CC(Cl)=C9F)=O)=C1	ClC1=CC=C2C(NC([C@@]23C4(CCCCC4)N[C@@H](C(NC5=CC=C(C(NCCCC#CC6=CC=CC(C7=O)=C6CN7C8C(N(C)C(CC8)=O)=O)=O)C=C5)=O)[C@@H]3C9=CC=CC(Cl)=C9F)=O)=C1	YL 22	https://www.ncbi.nlm.nih.gov/pubmed/30525597/	Uni Michigan	CRBN	Based on Lenalidomide	MDM2	903.833	5.88	4	8	12	157.02	2	4	5.19	18.19	6	alkyne	4	0
O=C(C1=C2C=CC=C1NCCOCCOCCC(N([C@@H]3CC([C@@]4(CC3)C)CC[C@@]5(C4CC[C@]6([C@]5(CC[C@@H]6C7=CC8=C(C=C7)C=CN=C8)[H])[H])[H])C)=O)N(C9CCC(NC9=O)=O)C2=O	O=C(C1=C2C=CC=C1NCCOCCOCCC(N([C@@H]3CC([C@@]4(CC3)C)CC[C@@]5(C4CC[C@]6([C@]5(CC[C@@H]6C7=CC8=C(C=C7)C=CN=C8)[H])[H])[H])C)=O)N(C9CCC(NC9=O)=O)C2=O	Compound 30	https://www.ncbi.nlm.nih.gov/pubmed/29937979/	Dana-Farber Cancer Institute	CRBN	Pomalidomide	CDK8	818.028	5.61	2	9	14	146.71	0	3	5.24	19.24	9	PEG2	4	0
CC1=NN=C2N1C3=C(C(C)=C(C)S3)C(C4=CC=C(Cl)C=C4)=N[C@H]2CC(NCCCCCCCCNC5=C6C(N=NN(C(CC7)C(NC7=O)=O)C6=O)=CC=C5)=O	CC1=NN=C2N1C3=C(C(C)=C(C)S3)C(C4=CC=C(Cl)C=C4)=N[C@H]2CC(NCCCCCCCCNC5=C6C(N=NN(C(CC7)C(NC7=O)=O)C6=O)=CC=C5)=O	TD-230	https://www.ncbi.nlm.nih.gov/pubmed/30684871/	Uni Science and Technology, Korea	CRBN	aminobenzotriazino glutarimide (TD)	BRD4	783.349	5.49	3	11	15	172.65	1	4	5.27	21.27	8	alkyl	5	0
O=C(N(C1=O)C2CCC(N(C2=O)C)=O)C3=C1C=CC=C3NCCOCCOCCOCCOCCC(N(C)[C@@H]4CC(CC[C@]5([H])C6CC[C@@]7([H])[C@@]5([H])CC[C@@H]7C8=CC9=C(C=CN=C9)C=C8)[C@]6(C)CC4)=O	O=C(N(C1=O)C2CCC(N(C2=O)C)=O)C3=C1C=CC=C3NCCOCCOCCOCCOCCC(N(C)[C@@H]4CC(CC[C@]5([H])C6CC[C@@]7([H])[C@@]5([H])CC[C@@H]7C8=CC9=C(C=CN=C9)C=C8)[C@]6(C)CC4)=O	Compound 31	https://www.ncbi.nlm.nih.gov/pubmed/29937979/	Dana-Farber Cancer Institute	CRBN	Pomalidomide	CDK8	920.161	6.03	1	11	20	156.38	0	3	5.37	25.37	15	PEG2	5	0
OC1=CC=C2C(SC(C3=CC=C(O)C=C3)=C2C(C4=CC=C(OCCN(CCCC(N[C@@H](C(C)(C)C)C(N5[C@H](C(N[C@@H](C)C6=CC=C(C7=C(C)N=CS7)C=C6)=O)C[C@@H](O)C5)=O)=O)CC)C=C4)=O)=C1	OC1=CC=C2C(SC(C3=CC=C(O)C=C3)=C2C(C4=CC=C(OCCN(CCCC(N[C@@H](C(C)(C)C)C(N5[C@H](C(N[C@@H](C)C6=CC=C(C7=C(C)N=CS7)C=C6)=O)C[C@@H](O)C5)=O)=O)CC)C=C4)=O)=C1	SW 16	https://pubs.acs.org/doi/abs/10.1021/acs.jmedchem.8b01572	Uni Michigan	VHL	VH032	ER	946.191	6.76	5	10	22	181.1	2	6	5.57	30.57	4	alkyl	4	0
O=C1N(C2C(NC(CC2)=O)=O)C(C3=C(NCCCCCCCNC(C4=CC=C(C=C4)NC([C@@H]([C@@H]5C6=CC=CC(Cl)=C6F)NC7(CCCCC7)[C@@]5(C8=CC=C(Cl)C=C8N9)C9=O)=O)=O)C=CC=C31)=O	O=C1N(C2C(NC(CC2)=O)=O)C(C3=C(NCCCCCCCNC(C4=CC=C(C=C4)NC([C@@H]([C@@H]5C6=CC=CC(Cl)=C6F)NC7(CCCCC7)[C@@]5(C8=CC=C(Cl)C=C8N9)C9=O)=O)=O)C=CC=C31)=O	YL 8	https://www.ncbi.nlm.nih.gov/pubmed/30525597/	Uni Michigan	CRBN	Pomalidomide	MDM2	950.89	6.21	6	10	16	194.91	2	4	5.77	22.77	8	alkyl	5	0
OC1=CC=C2C(SC(C3=CC=C(O)C=C3)=C2C(C4=CC=C(OCCN(CCCCC(N[C@@H](C(C)(C)C)C(N5[C@H](C(N[C@@H](C)C6=CC=C(C7=C(C)N=CS7)C=C6)=O)C[C@@H](O)C5)=O)=O)CC)C=C4)=O)=C1	OC1=CC=C2C(SC(C3=CC=C(O)C=C3)=C2C(C4=CC=C(OCCN(CCCCC(N[C@@H](C(C)(C)C)C(N5[C@H](C(N[C@@H](C)C6=CC=C(C7=C(C)N=CS7)C=C6)=O)C[C@@H](O)C5)=O)=O)CC)C=C4)=O)=C1	WS 17	https://pubs.acs.org/doi/abs/10.1021/acs.jmedchem.8b01572	Uni Michigan	VHL	VH032	ER	960.218	7.02	5	10	23	181.1	2	6	6.15	37.61	5	alkyl	4	0
ClC(C=C1)=CC=C1C(C(N=C2C3=C(C=C(C=C3)OC)OC(C)C)C4=CC=C(C=C4)Cl)N2C(N(CC5=O)CCN5CC(NCCOCCOCCOCCOCCN(N=N6)C=C6CCCC(N7CCN(C(C8=CC(CC9N=NC(C%10=C9C=CC=C%10)=O)=CC=C8F)=O)CC7)=O)=O)=O	ClC(C=C1)=CC=C1C(C(N=C2C3=C(C=C(C=C3)OC)OC(C)C)C4=CC=C(C=C4)Cl)N2C(N(CC5=O)CCN5CC(NCCOCCOCCOCCOCCN(N=N6)C=C6CCCC(N7CCN(C(C8=CC(CC9N=NC(C%10=C9C=CC=C%10)=O)=CC=C8F)=O)CC7)=O)=O)=O	ZQ 5	https://www.ncbi.nlm.nih.gov/pubmed/?term=30540295	Tsinghua University	MDM2	Nutlin-3a	PARP1	1344.33	6.85	1	18	35	251.07	1	6	6.28	44.28	17	PEG2	5	0
OC1=CC=C2C(SC(C3=CC=C(O)C=C3)=C2C(C4=CC=C(OCCN(CCCCCCC#CC5=C(CN(C6CCC(NC6=O)=O)C7=O)C7=CC=C5)CC)C=C4)=O)=C1	OC1=CC=C2C(SC(C3=CC=C(O)C=C3)=C2C(C4=CC=C(OCCN(CCCCCCC#CC5=C(CN(C6CCC(NC6=O)=O)C7=O)C7=CC=C5)CC)C=C4)=O)=C1	SW 13	https://pubs.acs.org/doi/abs/10.1021/acs.jmedchem.8b01572	Uni Michigan	CRBN	Based on Lenalidomide	ER	783.94	6.46	3	8	17	136.48	0	5	6.52	25.52	8	oct-1-yne	3	0
CC/C(C1=CC=CC=C1)=C(C2=CC=C(O)C=C2)/C3=CC=C(OCCN(C)C(COCCNC([C@H](C(C4=CC=CC=C4)C5=CC=CC=C5)NC([C@H]6N(C([C@H](C7CCCCC7)NC([C@H](C)NC)=O)=O)CCC6)=O)=O)=O)C=C3	CC/C(C1=CC=CC=C1)=C(C2=CC=C(O)C=C2)/C3=CC=C(OCCN(C)C(COCCNC([C@H](C(C4=CC=CC=C4)C5=CC=CC=C5)NC([C@H]6N(C([C@H](C7CCCCC7)NC([C@H](C)NC)=O)=O)CCC6)=O)=O)=O)C=C3	SNIPER(ER)-21	https://www.ncbi.nlm.nih.gov/pubmed/28154167	National Instutite of Health Sciences	IAP	MV1	ERα	1019.3	7.13	5	9	29	178.64	4	5	6.55	37.55	6	PEG2	4	0
OC1=CC=C2C(SC(C3=CC=C(O)C=C3)=C2C(C4=CC=C(OCCN(CC)CCCCCCCC(N[C@@H](C(C)(C)C)C(N5[C@H](C(N[C@@H](C)C6=CC=C(C#N)C=C6)=O)C[C@@H](O)C5)=O)=O)C=C4)=O)=C1	OC1=CC=C2C(SC(C3=CC=C(O)C=C3)=C2C(C4=CC=C(OCCN(CC)CCCCCCCC(N[C@@H](C(C)(C)C)C(N5[C@H](C(N[C@@H](C)C6=CC=C(C#N)C=C6)=O)C[C@@H](O)C5)=O)=O)C=C4)=O)=C1	SW 44	https://pubs.acs.org/doi/abs/10.1021/acs.jmedchem.8b01572	Uni Michigan	VHL	VH032	ER	930.174	6.98	5	10	26	192.53	2	5	6.62	34.62	8	alkyl	4	0
OC1=CC=C2C(SC(C3=CC=C(O)C=C3)=C2C(C4=CC=C(OCCN(CCCCCCCC(N[C@@H](C(C)(C)C)C(N5[C@H](C(N[C@@H](C)C6=CC=C(C7=C(C)N=CS7)C=C6)=O)C[C@@H](O)C5)=O)=O)C)C=C4)=O)=C1	OC1=CC=C2C(SC(C3=CC=C(O)C=C3)=C2C(C4=CC=C(OCCN(CCCCCCCC(N[C@@H](C(C)(C)C)C(N5[C@H](C(N[C@@H](C)C6=CC=C(C7=C(C)N=CS7)C=C6)=O)C[C@@H](O)C5)=O)=O)C)C=C4)=O)=C1	SW 22	https://pubs.acs.org/doi/abs/10.1021/acs.jmedchem.8b01572	Uni Michigan	VHL	VH032	ER	988.272	7.8	5	10	25	181.1	2	6	7.11	35.11	8	alkyl	4	0
OC1=CC=C2C(SC(C3=CC=C(O)C=C3)=C2C(C4=CC=C(OCCN(CC)CCCCCCCC(N[C@@H](C(C)(C)C)C(N5[C@H](C(N[C@@H](C)C6=CC=C(Cl)C=C6)=O)C[C@@H](O)C5)=O)=O)C=C4)=O)=C1	OC1=CC=C2C(SC(C3=CC=C(O)C=C3)=C2C(C4=CC=C(OCCN(CC)CCCCCCCC(N[C@@H](C(C)(C)C)C(N5[C@H](C(N[C@@H](C)C6=CC=C(Cl)C=C6)=O)C[C@@H](O)C5)=O)=O)C=C4)=O)=C1	SW 43	https://pubs.acs.org/doi/abs/10.1021/acs.jmedchem.8b01572	Uni Michigan	VHL	VH032	ER	939.606	7.61	5	9	25	168.74	2	6	7.37	35.37	8	alkyl	4	0
S=C1N(C2=CC=C(C#CC3=CC=C(N4CCN(C(N[C@@H](C(C)(C)C)C(N5C[C@H](O)CC5C(N[C@@H](C)C6=CC=C(C7=C(C)N=CS7)C=C6)=O)=O)=O)CC4)N=C3)C=C2)C(C)(C)C(N1C8=CC=C(C#N)C(C(F)(F)F)=C8)=O	S=C1N(C2=CC=C(C#CC3=CC=C(N4CCN(C(N[C@@H](C(C)(C)C)C(N5C[C@H](O)CC5C(N[C@@H](C)C6=CC=C(C7=C(C)N=CS7)C=C6)=O)=O)=O)CC4)N=C3)C=C2)C(C)(C)C(N1C8=CC=C(C#N)C(C(F)(F)F)=C8)=O	WS 25	https://www.ncbi.nlm.nih.gov/pubmed/?term=30629437	Uni Michigan	VHL	Based on VH032	AR	1045.21	6.6	3	12	18	177.28	2	5	7.4	27.4	10	alkyne pyridine piperazine	5	0
CN[C@@H](C)C(=O)N[C@@H](C1CCCCC1)C(=O)N1CCC[C@H]1C1=NC(=CS1)C(=O)C1=CC=CC(OCCOC2=CC=C(OCCOC3=CC=C(CN4C(C)=C(C#N)C(=C4C)C4=CC=C(C=C4)C#N)C=C3)C=C2)=C1	CN[C@@H](C)C(=O)N[C@@H](C1CCCCC1)C(=O)N1CCC[C@H]1C1=NC(=CS1)C(=O)C1=CC=CC(OCCOC2=CC=C(OCCOC3=CC=C(CN4C(C)=C(C#N)C(=C4C)C4=CC=C(C=C4)C#N)C=C3)C=C2)=C1	SNIPER(AR)-66	https://www.ncbi.nlm.nih.gov/pubmed/28594553	National Instutite of Health Sciences	IAP	LCL161	AR	988.217	7.56	2	12	25	178.61	1	6	8.17	36.17	11	PEG2 benzyl	5	0
CN[C@@H](C)C(=O)N[C@@H](C1CCCCC1)C(=O)N1CCC[C@H]1C1=NC(=CS1)C(=O)C1=CC=CC(OCCOC2=CC=CC(OCCOC3=CC=C(CN4C(C)=C(C#N)C(=C4C)C4=CC=C(C=C4)C#N)C=C3)=C2)=C1	CN[C@@H](C)C(=O)N[C@@H](C1CCCCC1)C(=O)N1CCC[C@H]1C1=NC(=CS1)C(=O)C1=CC=CC(OCCOC2=CC=CC(OCCOC3=CC=C(CN4C(C)=C(C#N)C(=C4C)C4=CC=C(C=C4)C#N)C=C3)=C2)=C1	SNIPER(AR)-67	https://www.ncbi.nlm.nih.gov/pubmed/28594553	National Instutite of Health Sciences	IAP	LCL161	AR	988.217	7.48	2	12	25	178.61	1	6	8.17	36.17	10	PEG2 benzyl	5	0
CN[C@@H](C)C(=O)N[C@@H](C1CCCCC1)C(=O)N1CCC[C@H]1C1=NC(=CS1)C(=O)C1=CC=CC(OCCOC2=CC=CC=C2OCCOC2=CC=C(CN3C(C)=C(C#N)C(=C3C)C3=CC=C(C=C3)C#N)C=C2)=C1	CN[C@@H](C)C(=O)N[C@@H](C1CCCCC1)C(=O)N1CCC[C@H]1C1=NC(=CS1)C(=O)C1=CC=CC(OCCOC2=CC=CC=C2OCCOC2=CC=C(CN3C(C)=C(C#N)C(=C3C)C3=CC=C(C=C3)C#N)C=C2)=C1	SNIPER(AR)-68	https://www.ncbi.nlm.nih.gov/pubmed/28594553	National Instutite of Health Sciences	IAP	LCL161	AR	988.217	7.34	2	12	25	178.61	1	6	8.17	36.17	15	PEG2 dibenzyl	5	0
O=C([C@H]1N(C([C@@H](NC(C2(F)CC2)=O)C(C)(C)C)=O)C[C@H](O)C1)NCC3=CC=C(C4=C(C)N=CS4)C=C3OCCCCC(NCCNC5=CC=CC(C(N6C(CC7)C(NC7=O)=O)=O)=C5C6=O)=O	O=C([C@H]1N(C([C@@H](NC(C2(F)CC2)=O)C(C)(C)C)=O)C[C@H](O)C1)NCC3=CC=C(C4=C(C)N=CS4)C=C3OCCCCC(NCCNC5=CC=CC(C(N6C(CC7)C(NC7=O)=O)=O)=C5C6=O)=O	GMMC 18c	https://www.ncbi.nlm.nih.gov/pubmed/30826187/	Uni Dundee	VHL	VH032	CRBN	931.05	2.98	6	13	23	245.01	3	3	1.11	27.89	8	alkyl amide	5	0
O=C(/C=C/CN1CCN(CCOCCOCCOCCOCC(N[C@@H]2CN(C([C@H](C3CCCCC3)NC(C(C)NC)=O)=O)[C@H](C(N[C@H]4C(C=CC=C5)=C5CCC4)=O)C2)=O)CC1)N6CCC[C@@H](N7N=C(C8=CC=C(OC9=CC=CC=C9)C=C8)C%10=C7N=CN=C%10N)C6	O=C(/C=C/CN1CCN(CCOCCOCCOCCOCC(N[C@@H]2CN(C([C@H](C3CCCCC3)NC(C(C)NC)=O)=O)[C@H](C(N[C@H]4C(C=CC=C5)=C5CCC4)=O)C2)=O)CC1)N6CCC[C@@H](N7N=C(C8=CC=C(OC9=CC=CC=C9)C=C8)C%10=C7N=CN=C%10N)C6	TCP 2	https://www.ncbi.nlm.nih.gov/pubmed/?term=30807093	GSK, Uni Strathclyde	IAP	A 410099	BTK	1238.55	5.05	5	18	34	258.92	3	5	2.35	39.65	18	PEG2 piperidine	5	0
O=C(/C=C/CN1CCN(CCNC(CCCCN2C=C(COCCC(NC3=CC=CC4=C3CN(C5CCC(NC5=O)=O)C4=O)=O)N=N2)=O)CC1)N6CCC[C@@H](N7N=C(C8=CC=C(OC9=CC=CC=C9)C=C8)C%10=C7N=CN=C%10N)C6	O=C(/C=C/CN1CCN(CCNC(CCCCN2C=C(COCCC(NC3=CC=CC4=C3CN(C5CCC(NC5=O)=O)C4=O)=O)N=N2)=O)CC1)N6CCC[C@@H](N7N=C(C8=CC=C(OC9=CC=CC=C9)C=C8)C%10=C7N=CN=C%10N)C6	TCP 4	https://www.ncbi.nlm.nih.gov/pubmed/?term=30807093	GSK, Uni Strathclyde	CRBN	Lenalidomide	BTK	1076.23	2.23	4	18	25	264.23	2	6	1.76	32.24	21	alkyl, ether, triazole, piperazine	4	0
O=C(CCCNC(CCCCN1C=C(COCCC(NC2=CC=CC3=C2CN(C4CCC(NC4=O)=O)C3=O)=O)N=N1)=O)N5CCC[C@@H](N6N=C(C7=CC=C(OC8=CC=CC=C8)C=C7)C9=C6N=CN=C9N)C5	O=C(CCCNC(CCCCN1C=C(COCCC(NC2=CC=CC3=C2CN(C4CCC(NC4=O)=O)C3=O)=O)N=N1)=O)N5CCC[C@@H](N6N=C(C7=CC=C(OC8=CC=CC=C8)C=C7)C9=C6N=CN=C9N)C5	TCP 5	https://www.ncbi.nlm.nih.gov/pubmed/?term=30807093	GSK, Uni Strathclyde	CRBN	Pomlidomide	BTK	966.073	2.85	4	16	23	257.75	2	6	2.18	29.82	17	alkyl, ether, triazole,	4	0
O=C(/C=C/CN1CCN(CCOCC(N[C@@H]2CN(C([C@H](C3CCCCC3)NC([C@H](C)NC)=O)=O)[C@H](C(N[C@@H]4C(C=CC=C5)=C5CCC4)=O)C2)=O)CC1)N6CCC[C@@H](N7N=C(C8=CC=C(OC9=CC=CC=C9)C=C8)C%10=C7N=CN=C%10N)C6	O=C(/C=C/CN1CCN(CCOCC(N[C@@H]2CN(C([C@H](C3CCCCC3)NC([C@H](C)NC)=O)=O)[C@H](C(N[C@@H]4C(C=CC=C5)=C5CCC4)=O)C2)=O)CC1)N6CCC[C@@H](N7N=C(C8=CC=C(OC9=CC=CC=C9)C=C8)C%10=C7N=CN=C%10N)C6	TCP 6	https://www.ncbi.nlm.nih.gov/pubmed/?term=30807093	GSK, Uni Strathclyde	IAP	A 410099	BTK	1106.39	5.6	5	15	25	231.23	2	5	2.71	30.29	11	ether, alykl, piperazine	5	0
O=C(/C=C/CN1CCN(CCOCCOCCOCCOCCOCCOCC(N[C@@H]2CN(C([C@H](C3CCCCC3)NC([C@H](C)NC)=O)=O)[C@H](C(N[C@@H]4C(C=CC=C5)=C5CCC4)=O)C2)=O)CC1)N6CCC[C@@H](N7N=C(C8=CC=C(OC9=CC=CC=C9)C=C8)C%10=C7N=CN=C%10N)C6	O=C(/C=C/CN1CCN(CCOCCOCCOCCOCCOCCOCC(N[C@@H]2CN(C([C@H](C3CCCCC3)NC([C@H](C)NC)=O)=O)[C@H](C(N[C@@H]4C(C=CC=C5)=C5CCC4)=O)C2)=O)CC1)N6CCC[C@@H](N7N=C(C8=CC=C(OC9=CC=CC=C9)C=C8)C%10=C7N=CN=C%10N)C6	TCP 8	https://www.ncbi.nlm.nih.gov/pubmed/?term=30807093	GSK, Uni Strathclyde	IAP	A 410099	BTK	1326.65	4.69	5	20	40	277.38	3	5	2.26	45.74	25	PEG2 piperazine	4	0
O=C(/C=C/CN1CCN(CCOCCOCCOCCOCC(N[C@@H]2CN(C([C@@H](C3CCCCC3)NC([C@@H](C)NC)=O)=O)[C@@H](C(N[C@@H]4C(C=CC=C5)=C5CCC4)=O)C2)=O)CC1)N6CCC[C@@H](N7N=C(C8=CC=C(OC9=CC=CC=C9)C=C8)C%10=C7N=CN=C%10N)C6	O=C(/C=C/CN1CCN(CCOCCOCCOCCOCC(N[C@@H]2CN(C([C@@H](C3CCCCC3)NC([C@@H](C)NC)=O)=O)[C@@H](C(N[C@@H]4C(C=CC=C5)=C5CCC4)=O)C2)=O)CC1)N6CCC[C@@H](N7N=C(C8=CC=C(OC9=CC=CC=C9)C=C8)C%10=C7N=CN=C%10N)C6	TCP 10	https://www.ncbi.nlm.nih.gov/pubmed/?term=30807093	GSK, Uni Strathclyde	IAP	A 410099	BTK	1238.55	5.05	5	18	34	258.92	3	5	2.35	39.65	25	PEG2 piperazine	5	0
O=C(CCCN1CCN(CCOCCOCCOCCOCC(N[C@@H]2CN(C([C@@H](C3CCCCC3)NC([C@@H](C)NC)=O)=O)[C@@H](C(N[C@@H]4C(C=CC=C5)=C5CCC4)=O)C2)=O)CC1)N6CCC[C@@H](N7N=C(C8=CC=C(OC9=CC=CC=C9)C=C8)C%10=C7N=CN=C%10N)C6	O=C(CCCN1CCN(CCOCCOCCOCCOCC(N[C@@H]2CN(C([C@@H](C3CCCCC3)NC([C@@H](C)NC)=O)=O)[C@@H](C(N[C@@H]4C(C=CC=C5)=C5CCC4)=O)C2)=O)CC1)N6CCC[C@@H](N7N=C(C8=CC=C(OC9=CC=CC=C9)C=C8)C%10=C7N=CN=C%10N)C6	TCP 11	https://www.ncbi.nlm.nih.gov/pubmed/?term=30807093	GSK, Uni Strathclyde	IAP	A 410099	BTK	1240.56	4.94	5	18	35	258.92	3	5	1.9	41.1	25	PEG2 piperazine	4	0
O=C1NC(N)=NC2=C1[N+](CC3=CC=CC=C3)=CN2C4OC(COP(O)(NCCCCCC(NC(C=CC=C56)=C6CN(C(CC7)C(NC7=O)=O)C5=O)=O)=O)C(O)C4O	O=C1NC(N)=NC2=C1[N+](CC3=CC=CC=C3)=CN2C4OC(COP(O)(NCCCCCC(NC(C=CC=C56)=C6CN(C(CC7)C(NC7=O)=O)C5=O)=O)=O)C(O)C4O	TKAM 5a	https://www.ncbi.nlm.nih.gov/pubmed/30735900/	Uni Michigan	CRBN	Lenalidomide	elF4E	808.765	-1.54	8	12	16	277.56	1	3	-6.75	28.75	5	alkyl	5	0
O=C1NC(N)=NC2=C1[N+](CC3=CC=C(F)C=C3)=CN2C4OC(COP(O)(NCCCCCC(NC(C=CC=C56)=C6CN(C(CC7)C(NC7=O)=O)C5=O)=O)=O)C(O)C4O	O=C1NC(N)=NC2=C1[N+](CC3=CC=C(F)C=C3)=CN2C4OC(COP(O)(NCCCCCC(NC(C=CC=C56)=C6CN(C(CC7)C(NC7=O)=O)C5=O)=O)=O)C(O)C4O	TKAM 5b	https://www.ncbi.nlm.nih.gov/pubmed/30735900/	Uni Michigan	CRBN	Lenalidomide	elF4E	826.756	-1.18	8	13	16	277.56	1	3	-6.61	28.61	5	alkyl	5	0
O=S([O-])(N(CC(C(O)C1O)OC1N2C=[N+](CC3=CC=CC=C3)C4=C2N=C(N)NC4=O)C(CCC(NCCCCCC(NC5=CC=CC6=C5CN(C(CC7)C(NC7=O)=O)C6=O)=O)=O)=O)=O	O=S([O-])(N(CC(C(O)C1O)OC1N2C=[N+](CC3=CC=CC=C3)C4=C2N=C(N)NC4=O)C(CCC(NCCCCCC(NC5=CC=CC6=C5CN(C(CC7)C(NC7=O)=O)C6=O)=O)=O)=O)=O	TKAM 13a	https://www.ncbi.nlm.nih.gov/pubmed/30735900/	Uni Michigan	CRBN	Lenalidomide	elF4E	906.925	-2.25	7	15	20	325.61	2	3	-7.72	33.72	9	alkyl, amide	5	0
