# Supplementary material for: Developing degraders: principles and perspectives on design and chemical space
Source: PubMed Central journal article supplement — Medchemcomm. 2019 Aug 12;10(10):1755–64. doi: 10.1039/c9md00272c (PMC6894040; doi:10.1039/c9md00272c), 2019-08-12
Supplement: MD-010-C9MD00272C-s002.pdf [file MD-010-C9MD00272C-s002.pdf]

## Supplemental Information

### Developing Degraders: principles and perspectives on design and chemical space

Hannah J. Maple,\* Nat Clayden, Anne Baron, Callum Stacey and Robert Felix

**Supplemental Table 1.** Comparison between published experimental and calculated LogP and LogD values.

| Ref                                                                   | Compound          | eLogP | cLogP (this work) |
|-----------------------------------------------------------------------|-------------------|-------|-------------------|
| Steinebach <i>et al. Chem. Commun.</i> , 2019, <b>55</b> , 1821–1824. | CRBN-6-5-5-VHL    | 5.1   | 5.1               |
|                                                                       | CRBN-6-6-6-VHL    | 5.3   | 5.7               |
|                                                                       | CRBN-2-2-2-5-VHL  | 4     | 3.0               |
|                                                                       | CRBN-2-2-2-VHL    | 3.7   | 2.0               |
|                                                                       | CRBN-2-2-2-2-VHL  | 3.8   | 2.1               |
|                                                                       | CRBN-4-4-4-6-VHL  | 5     | 5.1               |
|                                                                       | CRBN-6-(2)5-6-VHL | 4.7   | 4.8               |
|                                                                       | CRBN-6-(4)3-6-VHL | 5.5   | 6.3               |
| Ref                                                                   | Compound          | eLogD | cLogD (this work) |
| Chessum <i>et al. J. Med. Chem.</i> , 2018, <b>61</b> , 918–933.      | 3                 | 2.2   | 2.1               |
|                                                                       | 10                | 1.9   | 1.1               |
|                                                                       | 16                | 2.7   | 2.8               |
